# Supplementary material for: Transcriptome and DNA Methylome Dynamics during Triclosan-Induced Cardiomyocyte Differentiation Toxicity
Source: Stem Cells Int. 2018 Oct 29;2018:8608327. doi: 10.1155/2018/8608327 (PMC6231387; doi:10.1155/2018/8608327)
Supplement: Supplementary 3 — Table S1: gene expressions in H9-derived CMs in the TCS-treated and the control groups. [file 8608327.f3.xlsx]

## Sheet: Sheet1
GeneID	baseMean	log2FoldChange	lfcSE	stat	pvalue	padj	TCS1	TCS2	TCS3	Control1	Control2	Control3
A1BG	314.66	0.360899	0.174188	2.0719	0.0382751	0.112165	396	277	359	297	258	303
A1BG-AS1	148.396	0.248215	0.199065	1.24691	0.212432	0.3998	173	137	159	148	126	149
A1CF	2.01535	-0.375263	0.598278	-0.627239	0.530503	0.721042	3	0	1	1	4	3
A2M	395.106	-3.57732	0.419136	-8.53498	1.4e-17	4.99e-16	53	36	33	585	1049	589
A2M-AS1	101.547	-1.53274	0.259512	-5.90625	3.5e-09	5.57e-08	47	47	51	139	176	153
A2ML1	4.34819	-0.305087	0.605224	-0.504089	0.614199	0.782557	1	8	1	5	5	6
A3GALT2	8.89658	0.9924	0.526718	1.88412	0.059549	0.157458	15	10	12	7	4	5
A4GALT	18.7421	-3.17122	0.544299	-5.82625	5.67e-09	8.83e-08	1	1	2	16	60	29
AAAS	1118.86	0.322254	0.168714	1.91006	0.056125	0.150615	1427	991	1207	1083	1006	977
AACS	479.733	0.198116	0.16175	1.22483	0.22064	0.411011	507	440	544	514	424	450
AACSP1	251.923	-0.0432965	0.175201	-0.247125	0.804811	0.900095	263	202	257	303	207	298
AADAC	0.768467	-0.0750957	0.485134	-0.154794	0.876984	NA	2	0	0	1	0	2
AADAT	133.354	-0.0976982	0.200846	-0.486434	0.62666	0.791759	129	115	130	157	113	166
AAED1	76.1724	0.160492	0.263722	0.608565	0.542813	0.730733	75	71	89	84	45	102
AAGAB	322.278	-0.0255204	0.155915	-0.163681	0.869982	0.937474	317	286	325	350	268	411
AAK1	467.847	-0.836724	0.157421	-5.3152	1.07e-07	1.39e-06	346	321	301	594	502	813
AAMDC	352.693	0.72913	0.187964	3.87909	0.000104849	0.000762634	503	399	380	301	263	251
AAMP	1868.74	-0.068729	0.14696	-0.467672	0.640019	0.800987	2004	1566	1729	1934	1922	2083
AANAT	13.134	-0.192195	0.469412	-0.409439	0.682217	0.828964	10	10	15	17	14	13
AAR2	498.502	-0.00981292	0.158802	-0.0617934	0.950727	0.977473	508	483	449	621	412	541
AARD	72.3087	-1.97093	0.289444	-6.80938	9.8e-12	2.06e-10	27	33	19	134	112	118
AARS	1521.83	-0.0711649	0.121689	-0.584811	0.558675	0.742748	1512	1308	1491	1659	1383	1860
AARS2	543.897	0.419397	0.151131	2.77506	0.00551919	0.0234648	559	563	690	526	369	576
AARSD1	2.05158	-0.161269	0.591775	-0.272518	0.785224	0.889116	0	2	3	0	4	3
AASDH	78.391	-0.196901	0.246046	-0.800261	0.42356	0.630327	65	74	72	83	73	109
AASDHPPT	536.975	-0.281129	0.158284	-1.7761	0.0757162	0.188999	465	471	468	617	442	827
AASS	586.516	-0.901297	0.192336	-4.68606	2.79e-06	2.88e-05	302	438	431	700	626	1123
AATBC	9.25043	-0.276942	0.536393	-0.516305	0.605642	0.775978	4	12	7	6	13	13
AATF	295.799	0.568361	0.196365	2.89442	0.00379864	0.0171256	453	273	307	260	214	268
AATK	491.427	-0.294937	0.16413	-1.79697	0.0723396	0.182306	471	365	444	556	548	578
AATK-AS1	17.6202	-0.288119	0.433739	-0.664269	0.506518	0.702469	13	15	17	14	22	25
ABALON	1001.44	-0.306952	0.160778	-1.90917	0.0562403	0.150834	841	809	943	1149	1163	1109
ABAT	329.923	-3.12517	0.219414	-14.2432	4.94e-46	9.17e-44	40	78	65	578	588	691
ABCA1	119.758	0.00562173	0.214091	0.0262586	0.979051	0.991046	130	111	107	117	111	147
ABCA10	7.42962	0.66276	0.545617	1.2147	0.224481	0.41592	7	11	10	6	5	5
ABCA11P	61.2133	0.206925	0.2851	0.725798	0.467962	0.670305	56	69	66	78	38	64
ABCA12	2.63048	0.238299	0.609547	0.390944	0.695838	0.837382	4	3	2	0	2	5
ABCA13	5.83462	0.25553	0.574049	0.445136	0.656222	0.812419	3	9	7	6	4	6
ABCA17P	5.23658	0.236118	0.581357	0.406151	0.684632	0.83064	7	5	5	3	6	5
ABCA2	1352.16	-1.29777	0.167268	-7.7586	8.59e-15	2.42e-13	804	673	766	1851	2111	1977
ABCA3	138.623	-1.26638	0.237718	-5.32723	9.97e-08	1.31e-06	77	68	85	179	227	200
ABCA4	13.5656	0.950662	0.473384	2.00823	0.0446192	0.126275	14	23	17	10	8	8
ABCA5	72.8495	0.298765	0.278892	1.07126	0.284054	0.488111	80	60	96	56	50	102
ABCA6	0.8191	-0.0970484	0.509133	-0.190615	0.848827	NA	1	1	0	0	1	2
ABCA7	420.362	-0.405455	0.190214	-2.13158	0.0330417	0.100068	341	321	383	465	540	467
ABCA8	132.466	-1.16589	0.238688	-4.88458	1.04e-06	1.17e-05	92	59	82	206	122	269
ABCA9	5.10157	-0.240544	0.586108	-0.410409	0.681506	0.828545	4	2	7	8	5	5
ABCB1	1.05889	0.545374	0.540263	1.00946	0.312754	NA	1	2	2	0	1	0
ABCB10	161.691	-0.786293	0.219046	-3.58962	0.00033116	0.00208923	107	126	107	220	141	302
ABCB11	2.13495	-1.42842	0.590835	-2.41763	0.0156221	0.055107	0	0	0	4	5	4
ABCB4	28.6996	1.26482	0.388682	3.25412	0.00113746	0.00615863	29	52	40	18	9	23
ABCB6	368.993	0.365368	0.178519	2.04667	0.0406905	0.117466	454	335	422	357	321	318
ABCB7	225.41	-0.645433	0.179893	-3.58786	0.000333397	0.00210111	170	174	162	266	260	339
ABCB8	736.627	0.472125	0.153255	3.08065	0.0020655	0.0102271	846	729	919	723	568	627
ABCB9	95.7262	-0.280258	0.301847	-0.928477	0.35316	0.562099	77	80	91	91	146	78
ABCC1	452.209	-0.277879	0.165124	-1.68285	0.0924034	0.219823	370	367	449	524	373	689
ABCC10	758.861	0.296689	0.153276	1.93566	0.0529098	0.143849	783	757	892	762	660	689
ABCC11	3.75066	-0.25357	0.605598	-0.418709	0.675428	0.825879	2	5	2	3	6	4
ABCC13	1.26309	0.080125	0.532569	0.15045	0.88041	NA	0	1	3	0	3	0
ABCC2	8.95027	-0.63475	0.555988	-1.14166	0.253595	0.45179	2	9	7	23	6	8
ABCC3	3.11358	-0.299831	0.610201	-0.491365	0.623169	0.789357	0	2	5	4	6	1
ABCC4	25.2638	-0.319	0.378415	-0.842989	0.399235	0.607124	16	25	23	32	25	32
ABCC5	1262.4	0.374116	0.126578	2.95562	0.00312046	0.0145044	1457	1258	1430	1138	1005	1299
ABCC6	80.4595	-1.56327	0.280389	-5.57535	2.47e-08	3.54e-07	52	23	38	119	120	142
ABCC6P2	13.0119	-1.38472	0.511451	-2.70743	0.00678069	0.0277753	10	4	3	30	9	27
ABCC8	1.16397	-0.897801	0.535188	-1.67754	0.0934365	NA	0	0	0	2	3	2
ABCC9	13.5921	-2.44407	0.525774	-4.64852	3.34e-06	3.4e-05	2	3	2	16	32	27
ABCD1	511.999	-0.172396	0.178477	-0.965931	0.334079	0.541473	478	403	516	593	568	512
ABCD2	1.09972	-0.309459	0.542986	-0.569921	0.568731	NA	2	0	0	1	1	3
ABCD3	274.892	0.0473886	0.171153	0.276878	0.781874	0.887095	250	273	288	284	214	361
ABCD4	1100.95	0.153661	0.127054	1.20942	0.226503	0.41836	1110	1044	1216	1122	872	1298
ABCE1	431.249	-0.170262	0.161917	-1.05154	0.293011	0.49827	403	417	354	462	376	612
ABCF1	1057.15	-0.187696	0.147718	-1.27064	0.203856	0.389107	1139	852	878	1256	1007	1269
ABCF2	633.864	-0.113627	0.148057	-0.767456	0.442811	0.647899	684	502	584	729	571	774
ABCF3	891.024	0.0539092	0.155584	0.346495	0.728971	0.857316	1021	738	882	986	825	911
ABCG1	65.3287	1.90649	0.295776	6.44572	1.15e-10	2.18e-09	93	105	107	37	14	31
ABCG2	7.78138	-0.883171	0.561009	-1.57425	0.115429	0.258627	4	6	3	5	16	12
ABCG4	238.553	0.0928943	0.226011	0.411017	0.68106	0.828366	328	181	209	291	207	221
ABCG5	6.00216	-0.224873	0.581902	-0.386444	0.699168	0.839934	5	8	2	4	10	6
ABCG8	0.809872	0.1855	0.523892	0.35408	0.723279	NA	1	1	1	1	0	1
ABHD1	45.8283	0.100854	0.344397	0.292842	0.769643	0.880557	74	29	36	54	36	49
ABHD10	220.986	-0.177878	0.185541	-0.958697	0.337711	0.545421	233	183	186	256	180	312
ABHD11	219.103	-0.515085	0.187662	-2.74474	0.0060558	0.0253712	163	158	200	301	239	267
ABHD11-AS1	3.83522	0.880705	0.607845	1.4489	0.147367	0.31115	11	3	3	3	1	2
ABHD12	1002.74	-0.117338	0.168481	-0.69645	0.486147	0.684274	1174	748	876	1093	1012	1146
ABHD12B	14.4197	1.29214	0.471507	2.74045	0.00613545	0.0256027	26	18	19	5	6	12
ABHD13	258.641	-0.298555	0.19038	-1.5682	0.116835	0.260892	259	213	200	290	214	411
ABHD14A	183.286	0.168868	0.221041	0.763968	0.444887	0.64984	246	152	168	225	133	186
ABHD14B	210.639	0.500171	0.182963	2.73373	0.00626223	0.0260707	278	220	221	194	151	201
ABHD15	79.7541	-0.0177957	0.272783	-0.0652376	0.947985	0.97631	56	72	102	99	71	81
ABHD16A	788.046	0.355824	0.151918	2.34221	0.01917	0.065142	991	708	880	755	641	759
ABHD16B	197.504	0.0508561	0.191691	0.265303	0.790776	0.891836	218	162	205	237	165	207
ABHD17A	3694.8	0.357225	0.152042	2.34951	0.0187981	0.0641775	4303	3394	4400	3739	3117	3170
ABHD17B	180.11	-0.430402	0.195664	-2.19969	0.0278286	0.0875805	147	141	156	211	157	295
ABHD17C	121.021	0.711095	0.219515	3.2394	0.00119783	0.00641731	167	129	144	113	68	107
ABHD2	517.337	-0.786132	0.154067	-5.10253	3.35e-07	4.1e-06	349	364	382	618	598	852
ABHD3	40.71	-0.39681	0.315522	-1.25763	0.208526	0.394792	34	30	37	43	40	65
ABHD4	848.904	0.135649	0.151613	0.894708	0.370943	0.579568	944	776	863	881	797	830
ABHD5	132.939	-0.665152	0.213105	-3.12125	0.00180088	0.00907563	108	98	89	159	162	190
ABHD6	108.698	0.019963	0.259297	0.0769891	0.938632	0.971816	138	78	103	146	93	98
ABHD8	308.473	0.0829351	0.20383	0.406883	0.684094	0.83027	355	273	294	368	299	256
ABI1	508.314	-0.0761153	0.155917	-0.488177	0.625425	0.790703	438	485	512	584	396	682
ABI2	937.849	-0.37922	0.138753	-2.73306	0.00627492	0.0260992	804	812	742	1169	842	1360
ABI3	16.9473	-0.823897	0.487724	-1.68927	0.0911677	0.217821	10	10	12	18	37	11
ABI3BP	95.5213	3.65275	0.327562	11.1513	7.05e-29	5.77e-27	132	177	213	14	3	20
ABL1	3314.46	0.421681	0.137827	3.0595	0.00221705	0.0108421	3174	3649	4204	3172	2397	3340
ABL2	243.285	-0.157155	0.17911	-0.877421	0.380258	0.58789	248	182	239	257	220	335
ABLIM1	1234.45	-1.71966	0.152717	-11.2604	2.06e-29	1.76e-27	628	518	499	2035	1439	2600
ABLIM2	21.8387	-0.198684	0.397227	-0.500177	0.616951	0.784463	18	23	17	24	24	25
ABLIM3	18.2376	-0.322878	0.436623	-0.73949	0.45961	0.662884	10	13	23	18	22	24
ABO	312.329	0.279564	0.255546	1.09399	0.27396	0.475901	175	419	398	312	216	365
ABR	1339.84	0.329281	0.136013	2.42096	0.0154797	0.0547345	1412	1346	1580	1335	1099	1266
ABRA	16.1396	-1.78436	0.596921	-2.98927	0.00279641	0.0132222	0	0	0	17	7	88
ABRACL	307.593	0.876985	0.199972	4.38553	1.16e-05	0.000104909	506	338	320	234	206	228
ABT1	594.589	0.323345	0.154383	2.09443	0.0362213	0.107542	715	574	634	614	484	547
ABTB1	318.195	0.649032	0.200929	3.23015	0.00123725	0.00660275	391	309	436	204	271	285
ABTB2	248.166	-1.77106	0.211091	-8.39005	4.86e-17	1.64e-15	125	102	90	400	269	578
ACAA1	1047.24	-0.0750796	0.151498	-0.495582	0.620189	0.786873	1016	922	1021	1149	1090	1086
ACAA2	696.819	-0.193151	0.141629	-1.36378	0.172636	0.348654	687	554	648	860	596	899
ACACA	839.708	0.0837911	0.154178	0.54347	0.586806	0.762694	707	859	939	922	730	900
ACACB	678.491	-1.54054	0.171788	-8.96768	3.03e-19	1.25e-17	357	293	342	880	1060	1212
ACAD10	541.072	0.307054	0.159385	1.92648	0.0540439	0.146259	639	461	647	535	385	611
ACAD11	8.09381	-0.10993	0.546249	-0.201245	0.840507	0.920846	3	12	7	8	7	12
ACAD8	377.562	-0.283969	0.155797	-1.82269	0.0683503	0.174596	319	302	366	459	377	464
ACAD9	573.274	0.212503	0.139042	1.52834	0.126428	0.277145	607	539	644	590	454	627
ACADL	6.96416	-2.09667	0.589904	-3.55426	0.000379042	0.00235958	1	1	1	13	18	7
ACADM	457.015	-0.581961	0.151721	-3.83573	0.000125193	0.000889571	334	365	358	570	455	715
ACADS	330.728	0.146596	0.165314	0.886773	0.375201	0.583453	345	292	374	356	288	336
ACADSB	249.756	-1.30568	0.187294	-6.97131	3.14e-12	6.93e-11	130	124	157	335	357	423
ACADVL	8596.02	0.169616	0.134828	1.25802	0.208385	0.39458	10222	7179	9118	8733	7030	9684
ACAN	26.9662	-1.61875	0.39969	-4.05001	5.12e-05	0.000404347	14	8	12	46	47	36
ACAP1	90.4355	0.529928	0.23487	2.25626	0.0240543	0.078115	110	93	109	83	69	77
ACAP2	350.448	0.221196	0.183128	1.20788	0.227095	0.419267	315	381	400	364	226	445
ACAP3	4025.51	0.872857	0.146215	5.96969	2.38e-09	3.89e-08	4923	4465	5801	3206	2713	2863
ACAT1	288.393	-0.025685	0.162154	-0.158399	0.874142	0.939743	290	261	278	307	272	331
ACAT2	1024.22	-0.192677	0.16669	-1.1559	0.247723	0.444377	1065	863	842	1209	1108	1062
ACBD3	408.72	-0.139474	0.18171	-0.767562	0.442748	0.647899	309	425	390	439	334	594
ACBD4	146.128	0.0258247	0.202585	0.127475	0.898564	0.951419	140	128	160	149	142	160
ACBD5	157.372	-0.14289	0.206948	-0.690467	0.489901	0.687928	125	164	143	163	141	219
ACBD6	547.445	0.107224	0.143788	0.745712	0.455841	0.659162	603	497	550	543	483	626
ACBD7	33.1124	-0.282787	0.334955	-0.844253	0.398528	0.606618	28	27	31	39	30	47
ACCS	418.498	0.440332	0.155169	2.83775	0.00454324	0.0199578	466	426	512	368	283	474
ACD	402.967	0.611485	0.153608	3.98082	6.87e-05	0.000525245	471	417	532	351	278	369
ACE	17.7103	-2.4091	0.487836	-4.93834	7.88e-07	9.06e-06	4	2	5	37	36	23
ACE2	83.3931	-3.81094	0.574111	-6.638	NA	NA	3	1	2	86	285	102
ACER1	0.811553	0.404328	0.491991	0.82182	0.411179	NA	2	0	2	0	0	1
ACER2	9.53018	-0.120585	0.516587	-0.233426	0.815431	0.906401	6	12	8	9	8	15
ACER3	223.484	-0.126074	0.193713	-0.650831	0.515156	0.709867	208	207	205	267	157	326
ACHE	1916.51	0.536405	0.189022	2.83778	0.00454278	0.0199578	2947	1605	2091	1865	1423	1560
ACIN1	4263.73	0.334018	0.121283	2.75404	0.00588639	0.0247486	4743	4200	4886	4123	3465	4190
ACKR1	13.0496	-0.820163	0.476765	-1.72027	0.085384	0.207524	6	9	10	21	17	16
ACKR2	12.1135	-0.475699	0.481526	-0.9879	0.323202	0.53	7	11	10	19	11	16
ACKR3	479.635	1.38096	0.213182	6.47784	9.3e-11	1.77e-09	468	727	830	333	183	313
ACKR4	2.05508	-0.397076	0.605162	-0.656148	0.511729	0.707056	1	2	1	2	4	2
ACLY	1756.17	-0.151981	0.152006	-0.999837	0.317389	0.524274	1319	1728	1765	2120	1577	2124
ACMSD	9.77774	-0.276251	0.539448	-0.5121	0.608581	0.778153	11	7	7	16	2	19
ACO1	401.516	-0.205297	0.155266	-1.32223	0.186092	0.366695	386	305	393	489	360	509
ACO2	2409.62	-0.347751	0.128802	-2.69988	0.00693645	0.0283028	2057	1846	2250	2991	2490	2960
ACOT1	75.6136	-0.653902	0.275427	-2.37414	0.0175899	0.0608568	57	62	48	119	89	81
ACOT11	130.12	-0.991942	0.240045	-4.13232	3.59e-05	0.00029488	92	66	90	184	192	160
ACOT12	2.01967	-0.609765	0.60012	-1.01607	0.309595	0.516523	2	1	0	4	1	5
ACOT13	613.766	-0.0734949	0.185473	-0.396257	0.691915	0.835397	747	514	475	688	614	654
ACOT2	612.067	-0.496112	0.160668	-3.0878	0.00201643	0.0100148	516	458	494	751	737	732
ACOT4	15.4777	-0.252277	0.463342	-0.544472	0.586117	0.762327	13	12	15	23	19	10
ACOT6	1.50304	-0.809113	0.571142	-1.41666	0.156583	NA	1	0	0	4	3	1
ACOT7	354.315	0.154563	0.226231	0.683206	0.494477	0.692155	465	302	320	411	349	266
ACOT8	273.04	-0.292441	0.196238	-1.49024	0.136162	0.292902	297	175	241	314	292	333
ACOT9	476.088	0.355125	0.143459	2.47545	0.0133069	0.0486228	513	508	532	447	345	527
ACOX1	453.308	-0.0337125	0.14408	-0.233984	0.814997	0.90615	453	396	452	484	410	547
ACOX2	157.115	0.634777	0.228573	2.77713	0.00548408	0.0233545	139	184	235	150	105	127
ACOX3	172.875	0.180633	0.193771	0.932199	0.351234	0.560109	172	173	188	177	158	168
ACOXL	34.0867	-0.688394	0.363475	-1.89392	0.0582353	0.154926	27	19	28	42	25	73
ACP1	956.163	0.0405195	0.129249	0.313499	0.753902	0.872936	973	899	942	1073	816	1073
ACP2	739.509	-0.00988284	0.152177	-0.0649432	0.948219	0.97631	797	604	742	783	722	804
ACP5	3.52866	-0.0679165	0.607248	-0.111843	0.910948	0.957395	5	1	4	4	2	6
ACP6	144.122	-0.0211049	0.208667	-0.101142	0.919438	0.961488	154	111	151	145	142	166
ACPP	74.2088	-0.82056	0.274602	-2.98818	0.00280642	0.0132589	70	39	44	116	82	103
ACPT	15.4766	0.199519	0.460502	0.433264	0.664823	0.818749	12	21	15	13	18	12
ACR	7.39499	1.44026	0.559067	2.57618	0.00998986	0.0384482	16	8	11	3	2	4
ACRBP	17.9853	0.443373	0.434319	1.02085	0.307327	0.514326	24	17	21	13	9	26
ACRC	33.8142	-0.372229	0.339878	-1.09518	0.273436	0.475454	23	31	30	39	38	43
ACRV1	2.53166	-0.0654571	0.610398	-0.107237	0.914601	0.959242	3	1	3	1	4	3
ACSBG1	3.64597	0.406197	0.607619	0.668506	0.503811	0.700348	4	5	4	1	5	2
ACSBG2	8.41298	-0.104659	0.533108	-0.196319	0.844361	0.923366	6	9	8	6	11	10
ACSF2	672.097	-1.1987	0.22098	-5.42446	5.81e-08	7.9e-07	549	280	336	934	1038	926
ACSF3	310.763	0.0313142	0.171337	0.182764	0.854983	0.929511	358	252	304	338	278	347
ACSL1	217.123	-1.04802	0.217165	-4.82593	1.39e-06	1.53e-05	98	139	167	295	228	419
ACSL3	607.768	0.0686961	0.15126	0.454159	0.649714	0.807835	549	596	661	588	498	793
ACSL4	324.861	-0.469994	0.186925	-2.51435	0.0119252	0.0443652	241	264	282	358	287	568
ACSL5	5.66961	-0.0702947	0.573337	-0.122606	0.902419	0.952966	7	4	5	5	4	10
ACSL6	4.90169	-0.234172	0.598581	-0.391212	0.695641	0.837294	3	8	1	3	7	7
ACSM1	9.68217	-0.638027	0.539472	-1.18269	0.236933	0.431898	14	3	3	14	12	13
ACSM2A	0.542192	0.334989	0.388888	0.861402	0.389017	NA	0	3	0	0	0	0
ACSM2B	0.485488	-0.379108	0.430932	-0.879741	0.378999	NA	0	0	0	1	1	1
ACSM3	147.014	-0.527858	0.281501	-1.87516	0.0607712	0.15986	168	88	91	203	94	275
ACSM4	0.292493	-0.166948	0.352933	-0.473031	0.636191	NA	0	0	0	1	0	1
ACSM5	1.52947	0.14407	0.584238	0.246594	0.805222	NA	2	2	1	0	2	2
ACSM6	1.18489	0.68878	0.550778	1.25056	0.211096	NA	1	3	2	0	0	1
ACSS1	2.25262	0.288567	0.601372	0.479848	0.631335	0.795244	0	3	5	1	3	1
ACSS2	503	-0.516654	0.144863	-3.56651	0.000361772	0.00226076	411	380	406	616	557	682
ACSS3	108.559	0.288103	0.260566	1.10568	0.268864	0.470175	81	135	131	91	74	146
ACTA1	574.198	-4.17273	0.567418	-7.3539	1.93e-13	4.77e-12	13	5	18	337	1687	1378
ACTA2	4127.48	-0.610834	0.132897	-4.59629	4.3e-06	4.28e-05	3347	2946	3161	4982	4950	5611
ACTA2-AS1	2595.85	-0.602826	0.133633	-4.51106	6.45e-06	6.17e-05	2234	1753	1986	3180	2985	3631
ACTB	59522.5	0.193405	0.148423	1.30306	0.192553	0.374748	71604	51428	61970	66523	40489	69903
ACTC1	17381.8	-5.67551	0.147217	-38.552	0	0	669	514	649	31641	29340	47190
ACTG1	40455.5	0.742174	0.191024	3.88523	0.000102232	0.000747254	52155	43845	51930	39910	16863	40513
ACTG1P17	5.87199	-0.67236	0.580181	-1.15888	0.246505	0.442919	3	6	2	5	10	9
ACTG1P20	15.8029	-0.225723	0.469073	-0.48121	0.630367	0.794546	6	19	16	19	19	15
ACTG1P4	2.88469	-1.48778	0.609262	-2.44194	0.0146087	0.0521821	0	1	0	5	5	7
ACTG2	21.8746	-0.595661	0.417431	-1.42697	0.153589	0.320455	13	14	22	26	16	46
ACTL10	27.3943	-0.0457147	0.394321	-0.115933	0.907706	0.955683	39	21	18	22	32	32
ACTL6A	406.496	0.30289	0.155169	1.952	0.0509377	0.139861	470	413	423	426	282	444
ACTL6B	0.709982	0.516259	0.449319	1.14898	0.250564	NA	0	3	1	0	0	0
ACTL7B	0.699179	0.517627	0.450287	1.14955	0.25033	NA	2	2	0	0	0	0
ACTL8	20.4097	1.92599	0.431247	4.4661	7.97e-06	7.47e-05	33	31	34	10	6	6
ACTN1	2136.53	-0.568086	0.162594	-3.49388	0.000476049	0.00288492	1370	1675	1925	2550	2002	3615
ACTN1-AS1	2.03209	0.178725	0.591308	0.302253	0.762459	0.876924	2	2	3	0	0	6
ACTN2	2690.31	-3.8239	0.167718	-22.7996	4.63e-115	6.88e-112	323	342	314	4452	5389	5747
ACTN3	63.4739	-2.31376	0.299386	-7.72836	1.09e-14	3.04e-13	22	20	14	110	102	124
ACTN4	7522.75	-0.263221	0.117371	-2.24264	0.02492	0.0804301	6538	6335	6955	8255	7505	10019
ACTR10	768.171	0.0753268	0.132026	0.570547	0.568307	0.749298	776	747	764	768	659	928
ACTR1A	2436.24	0.171664	0.149318	1.14966	0.250286	0.447773	2890	2216	2401	2536	2227	2343
ACTR1B	1478.11	0.180391	0.135917	1.32721	0.184438	0.364523	1633	1393	1538	1554	1297	1465
ACTR2	1317.13	-0.0527693	0.13908	-0.379417	0.704378	0.843297	1173	1366	1201	1403	1146	1686
ACTR3	961.66	-0.154363	0.141268	-1.0927	0.274527	0.476522	887	830	925	1106	765	1363
ACTR3B	189.043	-0.125074	0.185743	-0.67337	0.500712	0.697711	190	164	171	230	151	246
ACTR3C	75.8078	0.0530498	0.251049	0.211312	0.832644	0.916679	88	61	76	84	61	90
ACTR5	153.296	0.174655	0.203755	0.857182	0.391345	0.599625	147	149	177	181	113	160
ACTR6	144.013	0.168696	0.202103	0.8347	0.403887	0.612006	161	136	147	144	104	183
ACTR8	289.156	0.0579265	0.169972	0.340801	0.733254	0.859745	269	303	283	295	228	376
ACTRT1	0.502756	0.148268	0.43154	0.343578	0.731164	NA	0	1	1	1	0	0
ACTRT2	1.81152	-0.958359	0.583659	-1.64199	0.100593	NA	1	0	0	6	3	1
ACTRT3	30.585	-0.0274288	0.372672	-0.0736006	0.941328	0.973026	22	30	36	46	18	35
ACVR1	185.067	-0.0156983	0.189175	-0.0829828	0.933865	0.969519	189	167	179	192	144	257
ACVR1B	868.794	-0.566758	0.155935	-3.63458	0.000278435	0.0017908	720	622	683	944	1062	1227
ACVR1C	2.37771	0.426388	0.606841	0.702635	0.482283	0.681247	2	5	2	0	2	3
ACVR2A	269.213	-0.1668	0.165814	-1.00595	0.31444	0.521677	261	236	238	285	258	353
ACVR2B	479.788	-0.700486	0.157964	-4.43447	9.23e-06	8.55e-05	361	324	372	596	471	832
ACVR2B-AS1	26.2119	0.548118	0.373781	1.46642	0.142535	0.303391	26	28	38	19	20	26
ACVRL1	78.2598	-0.865338	0.35504	-2.4373	0.0147974	0.052725	35	50	69	73	156	75
ACY1	37.3705	0.0258341	0.325363	0.0794008	0.936714	0.970808	43	28	39	43	30	44
ACY3	0.919209	0.0513443	0.5046	0.101752	0.918953	NA	1	0	2	0	0	3
ACYP1	58.1197	-0.606525	0.296738	-2.04397	0.0409561	0.118043	54	41	36	68	79	71
ACYP2	75.972	-0.758881	0.254026	-2.98741	0.00281352	0.013289	60	54	47	93	88	122
ADA	130.58	0.433843	0.227866	1.90394	0.0569184	0.152332	172	130	136	147	92	107
ADAD2	0.667508	0.300034	0.465161	0.645012	0.51892	NA	0	2	1	0	0	1
ADAL	86.6877	-0.0553147	0.265094	-0.208661	0.834713	0.917932	72	66	110	93	62	129
ADAM10	834.698	-0.0427182	0.154338	-0.276783	0.781947	0.887095	723	809	852	840	671	1189
ADAM11	444.322	-0.848455	0.1544	-5.49517	3.9e-08	5.41e-07	306	288	321	552	546	696
ADAM12	1482.16	1.81544	0.17674	10.2718	9.44e-25	5.91e-23	1975	2271	2489	816	408	839
ADAM15	602.067	1.32644	0.177978	7.45287	9.13e-14	2.33e-12	794	754	967	384	347	313
ADAM17	225.642	-0.497864	0.191465	-2.60028	0.00931478	0.0363045	149	198	192	276	213	353
ADAM18	11.0733	1.40698	0.510412	2.75655	0.00584139	0.0246	22	15	13	4	6	5
ADAM19	1056.93	-0.0250167	0.152602	-0.163934	0.869783	0.937373	953	1014	1071	966	929	1481
ADAM1A	99.6657	-0.464135	0.241131	-1.92482	0.0542516	0.146664	70	89	82	120	85	167
ADAM2	0.660811	0.242343	0.439932	0.550864	0.581727	NA	3	0	0	1	0	0
ADAM20	0.276515	-0.149727	0.335972	-0.445652	0.655848	NA	0	0	0	0	0	2
ADAM20P1	5.60801	-0.371805	0.578948	-0.642209	0.520737	0.713753	5	4	4	7	9	4
ADAM22	74.4059	-1.85794	0.27404	-6.77981	1.2e-11	2.51e-10	27	35	26	132	90	155
ADAM23	113.233	-1.79179	0.259765	-6.89775	5.28e-12	1.14e-10	28	51	61	178	163	218
ADAM28	79.7073	-3.98801	0.390161	-10.2214	1.59e-24	9.68e-23	4	5	10	129	86	289
ADAM32	5.11242	0.259445	0.588211	0.441075	0.659159	0.814784	6	5	6	9	2	3
ADAM33	4447.89	2.52944	0.186533	13.5603	6.89e-42	1.12e-39	5195	7384	9555	1473	1007	1529
ADAM3A	4.66768	1.28318	0.601157	2.13452	0.0328	0.0994707	4	12	6	1	2	2
ADAM8	185.513	0.253725	0.186627	1.35953	0.173977	0.350609	216	169	203	198	141	193
ADAM9	644.07	0.0264312	0.206282	0.128131	0.898045	0.951275	409	738	731	639	574	793
ADAMTS1	1318.77	-1.26967	0.171814	-7.3898	1.47e-13	3.69e-12	878	687	652	1994	1317	2714
ADAMTS10	2916.08	0.580798	0.135418	4.28893	1.8e-05	0.000157117	3504	3020	3656	2671	2164	2427
ADAMTS12	132.876	-1.64675	0.216356	-7.6113	2.71e-14	7.32e-13	53	66	62	214	172	256
ADAMTS13	337.798	0.614299	0.176686	3.47678	0.000507468	0.00305148	348	361	483	259	238	339
ADAMTS14	135.286	-0.990196	0.220374	-4.49326	7.01e-06	6.64e-05	110	74	75	186	169	213
ADAMTS15	793.804	0.313757	0.185433	1.69202	0.0906416	0.216701	618	900	1036	724	670	810
ADAMTS16	32.6613	1.27596	0.352535	3.61937	0.000295316	0.00188645	42	43	53	23	12	22
ADAMTS17	41.6678	0.0941325	0.308121	0.305505	0.759982	0.875599	38	44	43	45	33	49
ADAMTS18	181.406	0.96542	0.266455	3.62321	0.000290973	0.00186004	146	273	283	94	100	189
ADAMTS19	183.154	-0.750059	0.263981	-2.84133	0.00449254	0.0197741	127	135	128	231	119	414
ADAMTS19-AS1	23.6703	-0.751967	0.395571	-1.90097	0.0573064	0.153015	18	18	13	38	19	41
ADAMTS2	204.637	0.203288	0.219077	0.927929	0.353444	0.562427	169	246	220	176	146	285
ADAMTS20	8.64478	-0.520576	0.582586	-0.893561	0.371557	0.580004	3	13	2	4	5	28
ADAMTS3	96.8449	-0.252036	0.240566	-1.04768	0.294787	0.500056	103	80	73	111	80	146
ADAMTS4	94.5033	1.44552	0.284106	5.08794	3.62e-07	4.41e-06	86	138	183	52	48	51
ADAMTS5	41.7003	-0.464593	0.359447	-1.29252	0.196177	0.379852	40	18	43	55	27	78
ADAMTS6	212.351	0.686678	0.225856	3.04034	0.00236313	0.0114528	194	270	301	171	106	242
ADAMTS7	3819.82	0.920426	0.153564	5.99377	2.05e-09	3.38e-08	4842	4151	5605	3391	2092	2783
ADAMTS7P1	3.3572	0.459676	0.611085	0.752229	0.451913	0.656341	2	4	7	1	0	7
ADAMTS8	15.0464	-1.28611	0.473268	-2.71751	0.00657761	0.0271304	11	3	8	23	23	24
ADAMTS9	3077.78	0.752209	0.197263	3.81323	0.000137164	0.00096047	3022	3941	4287	2614	1361	3400
ADAMTS9-AS1	114.936	0.383889	0.298477	1.28616	0.198386	0.382303	82	134	165	119	48	156
ADAMTS9-AS2	6.84359	0.969822	0.558982	1.73498	0.0827448	0.202546	12	6	11	4	3	5
ADAMTSL1	84.1326	-4.22246	0.400327	-10.5475	5.21e-26	3.52e-24	1	6	9	166	208	113
ADAMTSL2	291.189	-0.234783	0.189951	-1.23602	0.216452	0.405293	320	202	255	348	302	332
ADAMTSL3	45.8769	-1.17321	0.337151	-3.47977	0.000501846	0.00301869	26	36	15	61	60	83
ADAMTSL4	513.757	-0.476221	0.158241	-3.00946	0.00261713	0.0125071	365	408	469	595	568	711
ADAMTSL4-AS1	7.31733	-0.322626	0.547905	-0.588835	0.555972	0.740424	7	6	5	6	7	14
ADAMTSL5	67.4031	-0.751663	0.331365	-2.26838	0.023306	0.0761655	35	46	60	77	116	64
ADAP1	344.572	2.14569	0.190045	11.2904	1.46e-29	1.27e-27	624	443	581	159	105	122
ADAP2	13.7477	0.0540796	0.460894	0.117336	0.906594	0.955169	12	12	17	13	10	20
ADAR	1855.27	0.126525	0.122744	1.03081	0.302631	0.508952	1838	1829	1954	2039	1463	2095
ADARB1	532.01	-0.0759581	0.153434	-0.495053	0.620563	0.787123	446	515	540	562	454	714
ADARB2	6.3762	-0.696063	0.570897	-1.21924	0.222752	0.413702	5	5	2	6	11	9
ADAT1	104.353	-0.546502	0.246313	-2.21873	0.0265051	0.0843236	71	85	88	146	79	177
ADAT2	140.154	-0.253551	0.219521	-1.15502	0.248081	0.444809	140	112	119	157	108	226
ADAT3	259.543	0.545401	0.195249	2.79336	0.00521638	0.0224017	305	246	349	263	190	201
ADCK1	198.98	-0.129361	0.185727	-0.696511	0.486109	0.684274	200	150	203	230	169	260
ADCK2	263.666	0.766877	0.167875	4.56815	4.92e-06	4.81e-05	354	284	331	210	173	226
ADCK3	328.726	-0.632487	0.193907	-3.2618	0.00110705	0.00601594	271	236	235	337	437	467
ADCK4	1216.19	0.571583	0.152527	3.74741	0.000178668	0.00121485	1588	1181	1472	1052	958	1016
ADCK5	760.869	0.249969	0.158452	1.57757	0.114664	0.257656	936	618	859	778	573	842
ADCY1	82.3193	-2.05207	0.276397	-7.42435	1.13e-13	2.87e-12	28	26	33	113	119	195
ADCY10	4.55521	0.0250953	0.6035	0.0415829	0.966831	0.985564	3	8	2	2	8	3
ADCY10P1	23.5844	-0.516232	0.40067	-1.28842	0.197599	0.381495	15	12	28	32	25	32
ADCY2	13.8468	-1.26447	0.481096	-2.62832	0.00858089	0.0339146	5	10	5	19	22	23
ADCY3	372.671	-0.0584717	0.172059	-0.339835	0.733981	0.860145	327	341	390	400	386	392
ADCY4	14.9165	-0.767314	0.488569	-1.57053	0.116291	0.260037	7	11	11	15	30	13
ADCY5	339.833	-0.0149247	0.191938	-0.0777579	0.938021	0.971634	397	283	304	384	232	482
ADCY6	1186.69	-0.451037	0.130057	-3.46799	0.000524357	0.00313753	1030	898	978	1378	1185	1773
ADCY7	377.835	-0.591384	0.159963	-3.697	0.000218161	0.00144967	284	283	303	465	446	507
ADCY8	13.3286	0.332423	0.518019	0.641721	0.521055	0.714023	30	8	7	9	7	21
ADCY9	157.001	-1.12676	0.257323	-4.37877	1.19e-05	0.000107887	52	102	124	224	208	248
ADCYAP1	6.48467	1.96529	0.582608	3.37327	0.000742811	0.00424616	10	10	14	2	1	1
ADCYAP1R1	14.6553	-0.318624	0.481822	-0.661289	0.508427	0.704185	12	5	20	14	20	17
ADD1	4674.09	-0.306248	0.126539	-2.42019	0.0155125	0.0548178	4384	3509	4247	5741	4701	5745
ADD2	43.5416	-0.209465	0.321943	-0.650628	0.515286	0.709907	28	48	40	57	35	57
ADD3	578.696	-0.260574	0.154333	-1.68839	0.0913364	0.21807	454	527	543	669	500	839
ADD3-AS1	20.604	-0.669746	0.420855	-1.5914	0.11152	0.252386	21	15	8	29	22	31
ADGRA1	0.55378	-0.134411	0.416246	-0.322912	0.746762	NA	0	0	1	0	2	0
ADGRA2	5377.4	-0.262398	0.160312	-1.6368	0.101672	0.235788	3839	4809	5501	6395	5721	6123
ADGRA3	891.981	0.143115	0.134937	1.06061	0.288866	0.493648	940	862	918	905	672	1115
ADGRB1	61.3115	1.81048	0.29995	6.03593	1.58e-09	2.64e-08	81	94	107	37	19	24
ADGRB2	1484.67	-0.606363	0.157385	-3.85274	0.000116804	0.000836287	1202	1017	1186	1762	1907	1874
ADGRB3	18.905	-0.322528	0.421593	-0.765023	0.444258	0.649456	15	16	17	27	12	30
ADGRD1	289.446	-2.36735	0.186901	-12.6663	9.09e-37	1.22e-34	74	99	90	495	415	633
ADGRE1	0.693107	-0.264937	0.468756	-0.565192	0.571943	NA	1	0	0	0	2	1
ADGRE2	2.87404	-0.41718	0.611135	-0.682633	0.494839	0.692346	2	2	2	1	3	8
ADGRE3	0.872018	-0.33365	0.474111	-0.703738	0.481596	NA	0	1	0	0	0	5
ADGRE4P	0.524248	-0.358063	0.413803	-0.865298	0.386875	NA	0	0	0	0	2	1
ADGRE5	67.7299	-0.969777	0.276952	-3.50161	0.00046246	0.00281309	42	45	42	76	96	110
ADGRF2	0.671614	0.315413	0.485497	0.64967	0.515905	NA	1	1	1	1	0	0
ADGRF3	15.0896	-0.61342	0.446395	-1.37416	0.169391	0.343813	12	9	12	21	17	21
ADGRF4	2.8795	-0.633722	0.610828	-1.03748	0.299512	0.505373	2	1	2	4	3	6
ADGRF5	0.97469	-0.48594	0.529207	-0.918242	0.358492	NA	0	1	0	3	1	1
ADGRG1	64.3321	-0.112538	0.26545	-0.423951	0.671602	0.823444	59	54	66	78	62	69
ADGRG2	63.9731	-3.49276	0.347396	-10.0541	8.81e-24	5.09e-22	9	10	5	114	97	170
ADGRG3	2.90335	-0.619812	0.611136	-1.0142	0.310488	0.517467	3	1	1	2	4	7
ADGRG5	45.5926	-0.194474	0.349078	-0.557107	0.577454	0.75616	67	30	26	60	41	53
ADGRG6	251.831	-1.55452	0.211889	-7.33647	2.19e-13	5.42e-12	111	119	132	325	297	593
ADGRG7	0.893457	-0.640062	0.481689	-1.32879	0.183918	NA	0	0	0	4	0	2
ADGRL1	3858.11	-0.0784658	0.137849	-0.569216	0.56921	0.749768	4128	3067	3721	4253	3756	4351
ADGRL2	807.048	0.100532	0.142542	0.70528	0.480636	0.679681	849	773	804	807	611	1061
ADGRL3	106.746	-0.440398	0.246385	-1.78744	0.0738662	0.185341	66	108	85	130	119	136
ADGRL3-AS1	11.3648	-0.473944	0.498617	-0.950517	0.34185	0.550162	5	10	11	15	15	12
ADGRL4	8.07808	-1.20454	0.575517	-2.09296	0.0363523	0.107842	1	7	2	13	18	6
ADGRV1	116.263	-0.0866952	0.217306	-0.398954	0.689927	0.834001	114	96	118	126	92	164
ADH1A	9.80353	-0.19843	0.523771	-0.378848	0.704801	0.843486	6	7	13	6	10	18
ADH1B	0.385991	-0.165878	0.351914	-0.47136	0.637384	NA	0	0	0	0	2	0
ADH5	1369.78	0.0817228	0.125623	0.650538	0.515345	0.709907	1404	1366	1315	1429	1114	1662
ADH6	6.3063	0.370153	0.576924	0.641597	0.521135	0.714023	4	4	14	8	4	4
ADHFE1	87.6054	-0.389633	0.234547	-1.66121	0.096671	0.227547	74	71	74	107	79	131
ADI1	608.021	-0.0614768	0.14704	-0.418095	0.675878	0.826036	591	541	594	669	600	664
ADIPOR1	644.471	-0.234437	0.144362	-1.62396	0.104385	0.240157	652	500	568	771	576	858
ADIPOR2	704.467	-0.201616	0.159754	-1.26204	0.206933	0.392915	624	658	615	866	532	1018
ADIRF	18.9303	0.400727	0.453242	0.884135	0.376623	0.584907	13	16	35	15	20	13
ADK	150.917	-0.0955082	0.216822	-0.440492	0.65958	0.815008	137	151	133	162	166	153
ADM	56.4331	-2.5333	0.333003	-7.60745	2.8e-14	7.53e-13	8	16	18	85	93	131
ADM2	15.2932	-0.0199936	0.450752	-0.0443561	0.964621	0.984211	13	16	15	23	10	16
ADM5	95.1911	-0.00212135	0.290186	-0.00731032	0.994167	0.997186	122	61	94	105	110	75
ADNP	1279.7	-0.082506	0.127298	-0.648133	0.516899	0.711115	1233	1131	1245	1434	1053	1691
ADNP-AS1	51.2571	0.157152	0.302207	0.520013	0.603055	0.774084	55	51	52	58	28	70
ADNP2	276.935	-0.000296614	0.170222	-0.00174252	0.99861	0.99945	257	279	266	267	252	352
ADO	467.449	0.0235325	0.177789	0.132362	0.894698	0.95027	381	521	461	550	345	580
ADORA1	111.998	-2.4847	0.26209	-9.48032	2.54e-21	1.23e-19	35	32	24	199	203	191
ADORA2A	12.1149	-0.20682	0.487226	-0.424486	0.671212	0.823206	11	9	12	8	15	18
ADORA2A-AS1	50.2586	-0.939407	0.29756	-3.15703	0.00159385	0.00819202	36	28	33	69	68	71
ADORA2B	33.2952	-0.440714	0.337617	-1.30537	0.191768	0.373914	28	22	31	43	31	49
ADORA3	0.349589	0.208326	0.371027	0.561485	0.574467	NA	1	1	0	0	0	0
ADPGK	589.989	0.150858	0.141587	1.06548	0.286658	0.49093	591	561	652	646	478	633
ADPGK-AS1	63.0886	-0.343221	0.268099	-1.2802	0.200473	0.384994	49	59	52	75	57	93
ADPRH	59.1669	-0.64299	0.288852	-2.22602	0.0260127	0.0831874	37	52	42	89	67	71
ADPRHL1	1129.19	-4.74005	0.224074	-21.154	2.54e-99	2.51e-96	87	56	68	2054	2609	1972
ADPRHL2	611.212	0.58971	0.166056	3.55128	0.000383364	0.00238234	822	589	733	598	425	497
ADPRM	44.2785	0.5774	0.315033	1.83282	0.0668289	0.171718	58	46	52	27	33	50
ADRA1B	43.8964	0.747529	0.340716	2.19399	0.0282359	0.088473	77	37	49	36	34	28
ADRA1D	45.2428	-3.23405	0.387826	-8.33892	7.5e-17	2.5e-15	11	6	2	99	76	87
ADRA2A	32.4993	2.55642	0.425511	6.00787	1.88e-09	3.11e-08	32	53	83	12	4	7
ADRA2B	169.52	-2.88726	0.226126	-12.7684	2.46e-37	3.45e-35	48	27	35	332	256	362
ADRA2C	103.695	-0.986536	0.226809	-4.34964	1.36e-05	0.00012221	66	69	63	158	125	152
ADRB1	1.37727	-0.421135	0.548115	-0.768333	0.44229	NA	0	0	2	3	3	0
ADRB2	9.72043	-2.2894	0.552495	-4.14374	3.42e-05	0.000282779	2	2	1	25	13	18
ADRB3	1130.77	0.679421	0.188548	3.60343	0.000314039	0.00199249	1653	1070	1352	1196	604	943
ADRBK1	1589.13	-0.00137485	0.15206	-0.00904148	0.992786	0.996869	1838	1312	1469	1629	1551	1769
ADRBK2	175.46	-1.00258	0.201225	-4.98241	6.28e-07	7.33e-06	121	106	108	227	188	336
ADRM1	2281.8	0.25092	0.157606	1.59207	0.111369	0.252193	2689	1956	2585	2415	1992	2051
ADSL	619.719	0.0718391	0.149866	0.479356	0.631685	0.79542	651	625	566	705	467	745
ADSS	307.035	-0.150279	0.163555	-0.918826	0.358187	0.567593	269	290	284	373	256	395
ADSSL1	378.041	-0.460679	0.185296	-2.48618	0.0129122	0.0474138	314	280	325	422	484	444
ADTRP	1.84914	-0.30291	0.60203	-0.503147	0.614861	NA	1	1	2	2	3	2
AEBP1	8294.02	0.457428	0.130109	3.51572	0.000438555	0.00268416	8886	8489	10558	7788	6405	7598
AEBP2	298.983	0.506175	0.160343	3.15683	0.00159494	0.00819527	329	333	359	278	201	299
AEN	233.583	0.0534653	0.174319	0.30671	0.759064	0.875221	235	225	231	271	176	280
AES	5160.87	-0.464417	0.16853	-2.7557	0.00585675	0.0246531	5341	3192	4063	6873	5557	6277
AFAP1	384.96	-0.0918231	0.160642	-0.571602	0.567592	0.748746	318	378	383	452	338	461
AFAP1-AS1	25.7999	-0.204467	0.381932	-0.535348	0.592409	0.766568	18	24	27	24	22	43
AFAP1L1	134.689	-3.09608	0.246956	-12.537	4.68e-36	6.1e-34	25	23	27	228	226	311
AFAP1L2	576.568	1.02526	0.192227	5.33359	9.63e-08	1.26e-06	581	829	842	448	256	498
AFF1	476.762	-0.09474	0.179343	-0.528263	0.597317	0.769903	430	462	444	475	360	748
AFF2	136.935	-2.29978	0.23572	-9.7564	1.73e-22	9.03e-21	48	38	41	209	238	267
AFF3	113.535	-0.658884	0.248438	-2.65211	0.00799914	0.0319018	74	95	83	129	101	221
AFF4	796.652	-0.0503102	0.163966	-0.306834	0.75897	0.875221	720	814	732	849	589	1161
AFG3L1P	328.217	-0.0584275	0.161991	-0.360683	0.718337	0.851151	281	312	339	378	290	385
AFG3L2	941.534	-0.20673	0.126158	-1.63866	0.101283	0.235145	856	810	869	1118	861	1202
AFMID	211.025	-0.275403	0.179572	-1.53366	0.125113	0.274936	208	156	190	251	204	273
AFP	20.9574	-1.52579	0.495125	-3.08162	0.00205875	0.0102022	13	8	4	14	55	28
AFTPH	122.125	-0.189882	0.239066	-0.794268	0.42704	0.633907	77	123	129	130	121	158
AGA	166.878	0.635594	0.198394	3.2037	0.00135676	0.00711908	194	174	226	150	96	167
AGAP1	494.37	-0.205718	0.153717	-1.33829	0.180801	0.359687	388	444	498	562	460	648
AGAP1-IT1	0.51609	-0.13045	0.433688	-0.300793	0.763573	NA	1	0	0	1	1	0
AGAP11	13.515	-0.330734	0.471361	-0.701659	0.482892	0.681629	12	10	12	13	10	27
AGAP2	12.7115	0.934771	0.487106	1.91903	0.0549808	0.148259	23	13	15	6	10	8
AGAP2-AS1	5.35158	1.24295	0.587621	2.11522	0.034411	0.103355	11	7	7	2	1	4
AGAP3	2500.6	0.0046585	0.137122	0.0339734	0.972898	0.98836	2449	2213	2614	2787	2390	2585
AGAP4	224.316	1.08191	0.222459	4.86339	1.15e-06	1.29e-05	231	319	341	170	88	197
AGAP5	133.483	-0.390476	0.200278	-1.94968	0.0512146	0.140396	113	103	118	164	133	181
AGAP6	992.138	1.06514	0.145627	7.31412	2.59e-13	6.36e-12	1235	1225	1454	733	475	821
AGAP7P	66.5798	0.871065	0.279312	3.11861	0.00181704	0.00914932	63	97	92	53	38	54
AGAP9	6.63778	-0.832524	0.583799	-1.42605	0.153855	0.320824	1	8	2	8	5	18
AGBL2	25.4893	0.691944	0.384652	1.79888	0.0720369	0.181715	35	25	34	15	15	30
AGBL3	39.063	0.625464	0.334489	1.86991	0.0614961	0.161186	46	44	50	23	24	49
AGBL4	89.8148	-0.00180183	0.238845	-0.00754395	0.993981	0.997168	104	78	79	94	73	118
AGBL5	2376.37	0.484392	0.170964	2.83329	0.00460709	0.0201737	3491	2080	2528	2195	1843	2116
AGBL5-AS1	4.68426	0.180588	0.594174	0.303931	0.76118	0.876128	9	3	3	3	5	5
AGER	575.568	0.128896	0.194881	0.661412	0.508348	0.704185	740	424	591	587	563	547
AGFG1	491.784	-0.127187	0.158849	-0.800676	0.423319	0.630156	438	470	454	546	388	706
AGFG2	165.467	-0.209568	0.259189	-0.80855	0.418774	0.625531	193	134	116	192	207	142
AGGF1	258.061	-0.00911106	0.193305	-0.0471332	0.962407	0.982965	225	287	232	306	186	334
AGK	251.388	0.000243621	0.171784	0.00141818	0.998868	0.999611	245	219	266	276	235	274
AGL	319.694	-0.991978	0.176691	-5.61419	1.97e-08	2.87e-07	212	202	200	378	409	554
AGMAT	24.3855	-0.0293877	0.379498	-0.0774382	0.938275	0.971646	21	20	29	25	24	28
AGMO	8.53405	0.2789	0.526676	0.529549	0.596425	0.769253	9	10	9	10	4	10
AGO1	271.875	0.00215948	0.178765	0.01208	0.990362	0.996002	230	264	295	258	244	354
AGO2	52.5703	-0.397626	0.293937	-1.35276	0.176133	0.353633	43	49	38	55	51	85
AGO3	58.975	-0.366662	0.287762	-1.27419	0.202598	0.387613	45	56	47	62	51	101
AGO4	412.506	-0.512165	0.162272	-3.1562	0.00159837	0.00821052	312	341	329	489	389	669
AGPAT1	1729.37	-0.295828	0.157896	-1.87356	0.0609911	0.160273	1850	1284	1372	2070	1824	2050
AGPAT2	526.839	0.0566355	0.195526	0.289657	0.772078	0.882071	679	391	496	584	507	509
AGPAT3	601.404	-0.134961	0.143364	-0.941384	0.346508	0.555254	589	509	567	691	493	818
AGPAT4	601.028	0.190576	0.153398	1.24236	0.214102	0.401973	551	629	680	600	443	739
AGPAT4-IT1	12.587	-0.00256608	0.488094	-0.00525734	0.995805	0.998043	12	7	18	14	7	20
AGPAT5	202.005	-0.739041	0.198674	-3.71986	0.000199332	0.00133801	148	142	146	272	177	367
AGPAT6	1156	0.202303	0.134779	1.501	0.133357	0.288076	1365	1049	1185	1137	943	1300
AGPAT9	10.4263	-2.312	0.561426	-4.11808	3.82e-05	0.00031212	1	2	2	24	6	34
AGPS	381.84	-0.222045	0.163736	-1.35612	0.175062	0.352218	304	360	356	450	323	535
AGRN	13254	0.456537	0.148423	3.07591	0.00209862	0.0103738	12818	14184	17607	11682	10831	12149
AGRP	4.49666	0.528252	0.596367	0.885783	0.375734	0.584086	10	3	4	3	3	4
AGT	45.2683	-2.60094	0.361334	-7.19818	6.1e-13	1.44e-11	9	14	8	69	87	90
AGTPBP1	249.243	0.413896	0.190832	2.16891	0.0300895	0.0930062	231	295	302	233	158	288
AGTR1	0.666219	-0.265865	0.484375	-0.548884	0.583085	NA	0	1	0	1	1	1
AGTR2	30.9035	3.70904	0.448687	8.26641	1.38e-16	4.53e-15	64	55	53	3	2	3
AGTRAP	639.424	0.666815	0.167477	3.98152	6.85e-05	0.000524027	922	616	754	574	445	517
AHCTF1	296.763	-0.0529872	0.176794	-0.299711	0.764398	0.877682	317	276	252	295	249	416
AHCTF1P1	3.06623	-0.487636	0.61097	-0.798134	0.424793	0.631611	2	2	2	6	0	8
AHCY	2654.51	0.000381909	0.123176	0.00310051	0.997526	0.998926	2665	2481	2556	2926	2439	2931
AHCYL1	809.064	-0.00636502	0.139107	-0.0457563	0.963505	0.983579	730	787	824	929	647	992
AHCYL2	276.52	-0.913181	0.165738	-5.5098	3.59e-08	5.02e-07	173	185	194	387	305	454
AHDC1	3573.33	0.504955	0.139524	3.61912	0.000295609	0.00188764	3712	3903	4576	3232	2811	3127
AHI1	117.723	-0.0667264	0.24297	-0.274628	0.783602	0.887674	142	92	101	131	81	176
AHNAK	6466.44	0.99601	0.158637	6.27854	3.42e-10	6.11e-09	6776	9105	9146	4067	3737	5740
AHNAK2	30.8783	0.93468	0.356304	2.62327	0.00870911	0.0343188	35	40	45	24	20	19
AHR	58.6022	1.64927	0.294399	5.60217	2.12e-08	3.07e-07	74	98	90	28	20	37
AHRR	101.655	1.19228	0.228254	5.22349	1.76e-07	2.23e-06	150	127	138	62	49	81
AHSA1	785.775	-0.0877744	0.141841	-0.618823	0.536033	0.725204	791	656	766	941	721	874
AHSA2	912.286	0.289091	0.170236	1.69817	0.0894748	0.214458	813	965	1139	818	627	1174
AHSG	3.30754	-1.54676	0.609145	-2.53923	0.0111097	0.0418283	1	0	0	3	11	4
AHSP	1.02502	0.700431	0.492922	1.42098	0.155324	NA	5	1	0	0	0	0
AIDA	163.515	-0.845793	0.239886	-3.52582	0.00042218	0.0025973	73	140	119	203	186	280
AIF1	22.8365	0.838047	0.421113	1.99007	0.0465827	0.130704	45	22	21	21	14	13
AIF1L	384.581	-0.177015	0.159368	-1.11073	0.266683	0.467678	373	347	325	400	386	493
AIFM1	1492.31	-0.0673875	0.128717	-0.523534	0.600603	0.772358	1469	1341	1418	1618	1444	1705
AIFM2	107.955	-0.371655	0.258643	-1.43694	0.150735	0.315943	123	65	84	111	131	137
AIFM3	9.58621	-0.553612	0.526409	-1.05168	0.292949	0.498249	11	3	7	15	12	10
AIG1	212.363	0.16684	0.184109	0.906202	0.364829	0.573988	231	223	197	210	192	221
AIM1	7.54167	-0.790847	0.545301	-1.45029	0.146977	0.310474	6	3	5	11	10	11
AIM1L	7.48969	0.827765	0.553164	1.49642	0.134544	0.290087	8	8	14	5	6	3
AIM2	1.0049	0.03961	0.488711	0.08105	0.935402	NA	0	3	0	3	0	0
AIMP1	398.766	0.515497	0.154671	3.33286	0.000859589	0.00481343	474	450	441	349	259	431
AIMP2	360.459	-0.190631	0.185078	-1.03	0.303008	0.509441	413	263	302	442	352	408
AIP	457.935	0.162558	0.166453	0.976597	0.328769	0.536271	542	390	477	528	365	463
AIPL1	0.98453	-0.510726	0.532178	-0.95969	0.337211	NA	0	0	1	1	2	2
AIRE	2.34346	-0.515472	0.606138	-0.850421	0.395091	0.60318	0	3	1	2	4	4
AJAP1	2.19423	0.151531	0.602021	0.251703	0.80127	0.898036	0	5	2	1	2	3
AJUBA	1651.33	0.332985	0.156838	2.12311	0.0337444	0.101867	1485	1862	1997	1592	1108	1950
AK1	1191.97	0.207722	0.187154	1.1099	0.267042	0.468078	1519	1026	1178	1213	1175	1002
AK2	891.332	-0.136972	0.129655	-1.05643	0.290772	0.496021	840	782	841	1069	792	1080
AK3	567.931	-0.232838	0.153465	-1.5172	0.129215	0.281627	534	521	456	618	512	817
AK4	175.962	-0.865681	0.186678	-4.63729	3.53e-06	3.57e-05	127	105	127	246	199	274
AK5	6.05474	-0.145944	0.574078	-0.254223	0.799323	0.89661	6	8	2	7	7	6
AK6	162.212	0.0777897	0.214705	0.362311	0.71712	0.850218	197	138	149	167	162	159
AK7	28.5392	-0.482889	0.386285	-1.25008	0.211269	0.398349	24	20	23	28	45	29
AK8	36.0064	0.725726	0.336653	2.15571	0.0311062	0.0954706	55	33	45	26	24	33
AK9	32.6017	-0.242012	0.34062	-0.710505	0.477391	0.677348	25	27	34	35	32	45
AKAP1	230.482	-0.868308	0.174887	-4.96496	6.87e-07	7.98e-06	158	160	151	304	259	381
AKAP10	201.733	-0.132145	0.210659	-0.627295	0.530466	0.721042	136	211	209	217	178	273
AKAP11	308.828	-0.171732	0.169145	-1.01529	0.309967	0.516902	271	295	275	365	248	430
AKAP12	1574.86	0.735781	0.16851	4.36639	1.26e-05	0.000113667	1813	1895	2023	1427	751	1604
AKAP13	1025.74	0.298985	0.16168	1.84924	0.0644231	0.16715	957	1107	1224	1004	661	1275
AKAP14	1.48424	0.63937	0.580768	1.1009	0.270938	NA	4	1	2	1	0	1
AKAP3	4.69557	0.326927	0.588178	0.55583	0.578327	0.756852	4	5	7	4	4	4
AKAP4	3.40954	1.43893	0.61099	2.35508	0.0185186	0.0634544	3	6	9	2	0	0
AKAP5	52.89	0.0711883	0.304081	0.23411	0.8149	0.90615	51	54	53	56	30	81
AKAP6	54.8635	-2.816	0.350012	-8.04545	8.59e-16	2.62e-14	8	12	13	80	112	110
AKAP7	124.847	-0.355604	0.231446	-1.53644	0.12443	0.27379	94	129	91	153	135	150
AKAP8	473.299	0.0579003	0.147445	0.392691	0.694548	0.836884	438	469	493	475	417	565
AKAP8L	2192.6	0.197305	0.148196	1.33138	0.183066	0.362775	2710	1844	2272	2201	1899	2275
AKAP9	463.987	0.181291	0.173392	1.04556	0.295765	0.50128	422	504	505	448	321	621
AKIP1	209.776	0.486272	0.190286	2.55547	0.0106043	0.0403259	246	226	240	196	173	170
AKIRIN1	1278.67	-0.629621	0.134821	-4.67005	3.01e-06	3.08e-05	948	946	1010	1758	1190	2006
AKIRIN2	513.648	-0.255056	0.141421	-1.80353	0.0713054	0.180208	447	447	463	622	460	687
AKNA	418.886	-0.0184128	0.183583	-0.100297	0.920109	0.96202	349	410	446	413	451	436
AKNAD1	0.51609	-0.13045	0.433688	-0.300793	0.763573	NA	1	0	0	1	1	0
AKR1A1	1511.14	0.420845	0.159797	2.63362	0.00844797	0.0334375	2018	1446	1577	1488	1218	1301
AKR1B1	2718.97	0.411317	0.185605	2.21609	0.0266855	0.0847312	3931	2442	2690	3024	1992	2254
AKR1B10	102.16	0.68669	0.295324	2.32521	0.0200608	0.0676596	171	94	107	124	48	72
AKR1B15	418.947	0.3206	0.168762	1.89972	0.0574701	0.153302	504	442	407	452	272	459
AKR1C1	127.9	-2.82057	0.277923	-10.1487	3.36e-24	2.01e-22	30	25	28	193	274	224
AKR1C2	27.2155	-0.42257	0.407135	-1.03791	0.299311	0.505129	21	13	32	34	39	23
AKR1C3	10.1509	-1.57692	0.52968	-2.97712	0.00290972	0.013689	6	2	3	13	16	23
AKR1C6P	1.10923	-0.874548	0.531435	-1.64563	0.0998392	NA	0	0	0	2	2	3
AKR1D1	1.48295	0.138076	0.577704	0.239009	0.811099	NA	4	0	1	2	1	1
AKR1E2	32.9414	-0.710793	0.34556	-2.05693	0.0396927	0.115353	21	26	23	44	42	43
AKR7A2	582.858	0.338084	0.157825	2.14215	0.0321814	0.0980114	720	561	613	589	480	532
AKR7A2P1	3.0077	0.0595379	0.611025	0.0974393	0.922377	0.963147	5	4	0	2	3	4
AKR7A3	54.5823	0.841934	0.28523	2.95177	0.00315958	0.0146595	77	59	70	40	38	41
AKR7L	36.3219	0.347592	0.329019	1.05645	0.290763	0.496021	45	41	33	33	26	41
AKT1	3744.34	0.248243	0.140647	1.76501	0.0775625	0.192852	4406	3381	4051	3805	3257	3574
AKT1S1	1437.06	0.166313	0.168013	0.98988	0.322233	0.529045	1592	1270	1562	1586	1353	1236
AKT2	2839.39	0.207474	0.130006	1.59588	0.110516	0.250648	3047	2665	3137	2856	2505	2842
AKT3	301.668	-0.449664	0.161883	-2.77772	0.00547424	0.0233182	236	240	262	382	280	445
AKTIP	287.717	-0.0464998	0.17701	-0.262695	0.792785	0.892522	294	228	301	275	285	354
ALAD	810.675	0.411456	0.138652	2.96755	0.0030018	0.0140407	908	859	922	729	668	767
ALAS1	545.483	-0.315632	0.158748	-1.98826	0.0467826	0.131107	544	427	437	653	581	653
ALAS2	9.93492	-1.14177	0.524983	-2.17487	0.0296398	0.091839	7	5	3	17	8	23
ALB	16.839	0.344157	0.437933	0.785867	0.431945	0.637886	17	18	21	16	8	23
ALCAM	257.748	0.0189951	0.169787	0.111876	0.910922	0.957395	281	239	233	287	219	300
ALDH16A1	1424.15	0.182359	0.14822	1.23032	0.218576	0.408055	1655	1182	1576	1511	1215	1440
ALDH18A1	1085.53	0.508185	0.148064	3.4322	0.000598711	0.00353694	1142	1236	1328	1042	654	1154
ALDH1A1	141.703	-4.55802	0.552569	-8.24878	1.6e-16	5.21e-15	2	4	0	231	403	197
ALDH1A2	180.234	1.73208	0.202153	8.56815	1.05e-17	3.81e-16	267	291	251	93	60	105
ALDH1A3	2.0077	0.0298701	0.603396	0.0495033	0.960518	0.982386	1	1	4	3	2	1
ALDH1B1	252.201	-0.601678	0.169873	-3.54193	0.000397214	0.00245642	187	199	192	329	249	388
ALDH1L1	10.9733	0.917352	0.512288	1.7907	0.0733422	0.184337	13	13	18	6	10	4
ALDH1L1-AS1	1.81578	0.14927	0.600305	0.248656	0.803627	NA	2	1	3	3	1	1
ALDH1L1-AS2	0.511984	-0.120386	0.433213	-0.277892	0.781096	NA	0	1	0	0	1	1
ALDH1L2	7.45561	-1.31284	0.566095	-2.31911	0.0203888	0.0684425	1	2	6	16	10	11
ALDH2	777.074	-0.685294	0.162888	-4.20713	2.59e-05	0.000218092	698	490	535	1033	929	1029
ALDH3A1	6.29416	0.0126962	0.604418	0.0210057	0.983241	0.992574	9	9	0	7	10	1
ALDH3A2	1023.06	-0.727463	0.130233	-5.58585	2.33e-08	3.34e-07	728	720	780	1403	1032	1617
ALDH3B1	42.3628	2.10568	0.350152	6.01362	1.81e-09	3.01e-08	51	68	86	13	11	21
ALDH3B2	1.13877	-0.619551	0.549932	-1.1266	0.259913	NA	0	0	1	2	2	2
ALDH4A1	818.508	-1.47478	0.165911	-8.889	6.17e-19	2.46e-17	515	340	387	1217	1168	1389
ALDH5A1	276.582	-0.372567	0.165555	-2.25041	0.0244229	0.0791247	248	228	221	352	277	352
ALDH6A1	312.817	-0.331445	0.162733	-2.03674	0.0416763	0.119559	251	253	298	370	323	400
ALDH7A1	1062.45	-0.0541234	0.130914	-0.413426	0.679294	0.827522	1049	945	1032	1257	938	1204
ALDH8A1	19.2313	-0.724561	0.439003	-1.65047	0.098847	0.231174	9	13	18	27	13	41
ALDH9A1	605.869	0.0452474	0.148625	0.30444	0.760793	0.875925	570	606	609	682	452	763
ALDOA	6500.64	-1.01503	0.184415	-5.50405	3.71e-08	5.16e-07	4813	3424	4148	9547	9565	7628
ALDOB	1.14787	0.149652	0.544693	0.274746	0.783511	NA	1	1	2	3	0	0
ALDOC	138.461	-1.0214	0.246069	-4.15089	3.31e-05	0.000275376	84	82	93	188	220	162
ALG1	476.017	0.211953	0.160569	1.32002	0.18683	0.367742	588	414	486	480	400	500
ALG10	27.8866	0.072512	0.366406	0.197901	0.843122	0.922679	31	31	21	27	22	37
ALG10B	126.672	-0.147448	0.21374	-0.689849	0.490289	0.688203	125	109	115	141	99	186
ALG11	41.3117	0.87912	0.368288	2.38704	0.0169846	0.0590256	34	63	62	34	12	45
ALG12	475.557	0.54036	0.146922	3.67786	0.000235199	0.00154894	547	521	571	441	345	424
ALG13	458.094	0.00427178	0.155303	0.027506	0.978056	0.990778	451	434	447	508	341	610
ALG14	99.0367	0.424929	0.223483	1.90139	0.0572504	0.152926	112	103	116	97	73	94
ALG1L	21.7746	0.229514	0.414114	0.554231	0.579421	0.757678	34	20	15	25	17	20
ALG1L2	43.7253	-0.220088	0.309824	-0.710366	0.477477	0.677388	42	41	33	46	48	53
ALG1L9P	26.0676	-0.160832	0.375965	-0.427785	0.668808	0.821811	21	19	31	29	28	29
ALG2	407.653	-0.134224	0.153419	-0.874886	0.381636	0.589204	372	374	381	449	341	566
ALG3	344.632	0.42901	0.166688	2.57374	0.0100607	0.0386551	383	343	426	353	257	307
ALG5	237.977	0.240651	0.194496	1.2373	0.215975	0.40457	283	194	275	204	219	255
ALG6	93.593	0.316435	0.240671	1.3148	0.188577	0.370034	104	96	102	71	87	100
ALG8	310.965	0.363868	0.172093	2.11437	0.0344834	0.103537	366	283	371	274	266	305
ALG9	348.526	0.0622217	0.158131	0.393483	0.693963	0.836526	351	305	380	386	272	422
ALK	49.343	0.951925	0.296842	3.20684	0.00134202	0.00705748	60	62	70	39	23	42
ALKBH1	122.675	-0.0434857	0.221245	-0.19655	0.844179	0.923281	134	96	122	151	90	156
ALKBH2	248.402	0.120704	0.207436	0.581884	0.560645	0.743843	320	218	215	306	201	238
ALKBH3	120.098	0.195044	0.225943	0.863243	0.388004	0.596042	153	111	109	130	102	117
ALKBH3-AS1	2.41303	0.819074	0.607795	1.34762	0.177782	0.356024	4	3	4	0	2	1
ALKBH4	368.229	0.170306	0.161246	1.05619	0.290883	0.49607	403	344	386	384	330	364
ALKBH5	1514	-0.393299	0.139369	-2.822	0.00477245	0.0208313	1212	1308	1263	1912	1626	1825
ALKBH6	308.913	0.546931	0.188574	2.90035	0.00372747	0.0168601	420	280	372	298	231	249
ALKBH7	1704.97	0.56418	0.159832	3.52982	0.000415838	0.00256182	2350	1654	1931	1661	1238	1375
ALKBH8	85.859	0.509302	0.243026	2.09567	0.0361119	0.107289	82	103	109	76	61	84
ALLC	1.1935	-0.632029	0.550272	-1.14858	0.250731	NA	0	0	1	2	3	1
ALMS1	186.488	-0.16302	0.185959	-0.876646	0.380679	0.588439	173	155	183	205	157	265
ALMS1-IT1	6.18701	0.563425	0.569726	0.988939	0.322693	0.529362	9	7	7	8	3	3
ALMS1P	2.60495	-0.478006	0.609152	-0.784707	0.432625	0.63852	1	0	4	5	3	3
ALOX12	102.212	-0.437538	0.222302	-1.96822	0.049043	0.135975	92	72	87	130	99	144
ALOX12-AS1	30.8279	-0.469689	0.366614	-1.28116	0.200139	0.384642	30	28	15	37	36	40
ALOX12B	4.39939	-1.4939	0.607569	-2.45882	0.0139395	0.0503773	2	0	1	7	11	5
ALOX12P2	36.3789	0.316003	0.349387	0.904448	0.365758	0.574805	54	35	29	36	33	30
ALOX15	1480.05	3.12477	0.365442	8.55067	1.22e-17	4.39e-16	2280	2588	3010	357	109	334
ALOX15B	43.7615	1.20308	0.368904	3.26124	0.00110927	0.00602616	31	68	82	24	29	23
ALOX15P1	9.7257	-1.02959	0.517822	-1.9883	0.0467786	0.131107	6	3	7	16	12	16
ALOX5	28.9971	1.71245	0.384919	4.44887	8.63e-06	8.06e-05	51	41	42	13	6	20
ALOX5AP	5.19489	0.513885	0.585127	0.878245	0.379811	0.587635	3	9	7	4	3	5
ALPK1	32.2501	1.46	0.360797	4.04658	5.2e-05	0.000409224	42	48	51	12	15	23
ALPK2	1817.9	-0.960123	0.208446	-4.6061	4.1e-06	4.1e-05	1045	1194	1292	2537	1375	3994
ALPK3	1844.16	-2.79839	0.166741	-16.7829	3.25e-63	1.21e-60	416	452	431	2902	3476	3627
ALPL	28.3993	-0.606846	0.416144	-1.45826	0.144769	0.306973	38	12	13	32	40	36
ALPP	2.47611	-0.733014	0.601088	-1.21948	0.222663	0.41358	1	1	1	0	8	3
ALPPL2	0.292493	-0.166948	0.352933	-0.473031	0.636191	NA	0	0	0	1	0	1
ALS2	315.122	-0.164419	0.170274	-0.965615	0.334237	0.541532	261	281	320	362	255	445
ALS2CL	144.889	-0.832845	0.281832	-2.95511	0.00312561	0.0145236	107	91	97	139	259	164
ALS2CR11	4.38202	0.0346403	0.597329	0.057992	0.953755	0.978893	4	5	4	2	3	9
ALS2CR12	0.88571	-0.107792	0.497782	-0.216544	0.828564	NA	0	2	0	0	2	1
ALX1	96.5672	0.707248	0.275729	2.56501	0.0103173	0.0395207	145	99	108	110	56	60
ALX3	103.422	0.125952	0.218845	0.575532	0.564931	0.746773	103	98	113	105	83	124
ALX4	143.328	1.89332	0.267274	7.0838	1.4e-12	3.19e-11	190	233	242	87	26	73
ALYREF	803.494	0.17041	0.140577	1.21222	0.225429	0.416894	931	727	818	832	612	949
AMACR	24.0713	-0.185406	0.41672	-0.444917	0.65638	0.812558	12	33	19	22	22	38
AMBP	2.72278	-0.759531	0.596902	-1.27246	0.203211	0.388287	0	1	2	0	10	2
AMBRA1	678.966	0.0647188	0.13694	0.472605	0.636495	0.798922	658	653	703	723	606	748
AMD1	400.093	-0.61168	0.165135	-3.70412	0.000212129	0.0014138	279	331	302	484	404	650
AMDHD1	5.67465	-1.15781	0.591327	-1.95799	0.0502315	0.138295	5	2	0	10	8	10
AMDHD2	863.168	0.542475	0.159391	3.40343	0.000665462	0.00386849	1148	822	1016	715	702	756
AMELX	0.306047	0.00990987	0.357212	0.0277422	0.977868	NA	0	0	1	0	0	1
AMER1	163.994	-0.665627	0.206377	-3.2253	0.00125842	0.00668677	134	119	111	210	207	209
AMER2	9.48842	-1.47113	0.529847	-2.77652	0.00549436	0.0233871	3	5	3	16	15	16
AMER3	23.2886	0.0662164	0.398815	0.166033	0.868131	0.936384	26	26	17	17	23	31
AMFR	771.445	0.0709649	0.130987	0.541771	0.587976	0.763719	769	747	778	802	632	943
AMH	1005.07	0.0984187	0.175626	0.560388	0.575215	0.754391	1062	766	1204	1066	972	964
AMHR2	1043.88	0.248393	0.178505	1.39152	0.164069	0.335674	1387	876	1043	1073	938	939
AMICA1	3.1936	-0.19892	0.426128	-0.466808	0.640637	0.801361	4	0	1	0	0	17
AMIGO1	45.823	-1.51225	0.311531	-4.85426	1.21e-06	1.34e-05	20	21	24	70	64	83
AMIGO2	756.486	1.02485	0.189627	5.40454	6.5e-08	8.77e-07	1014	938	1012	642	287	662
AMIGO3	326.633	0.338362	0.177158	1.90994	0.0561413	0.150636	365	286	413	282	283	332
AMMECR1	175.421	-0.224559	0.188707	-1.18999	0.234051	0.428221	162	160	146	191	163	244
AMMECR1L	322.271	-0.209962	0.162908	-1.28884	0.197455	0.381464	278	289	299	402	266	431
AMN	17.1022	0.92429	0.46775	1.97603	0.0481511	0.133974	28	9	32	15	8	11
AMN1	156.871	0.397611	0.198073	2.00739	0.0447078	0.126485	181	176	162	162	104	161
AMOT	1081.08	0.880723	0.186855	4.7134	2.44e-06	2.56e-05	1206	1477	1395	814	479	1146
AMOTL1	723.752	0.578414	0.138563	4.17438	2.99e-05	0.000249953	815	812	893	601	545	663
AMOTL2	1268.7	0.376248	0.411843	0.913572	0.360942	0.57054	849	1602	1764	1175	550	1826
AMPD2	1576.05	0.508759	0.132985	3.82567	0.000130414	0.000919344	1862	1613	1914	1536	1125	1410
AMPD3	34.8487	-0.991486	0.345296	-2.87141	0.00408645	0.0182387	25	18	22	42	39	70
AMPH	14.9811	-1.54756	0.478813	-3.23208	0.00122891	0.00656414	6	7	5	27	27	18
AMT	644.088	-0.247438	0.143	-1.73033	0.083571	0.204149	619	518	571	727	663	796
AMY2A	1.73944	-0.692411	0.58767	-1.17823	0.238705	NA	2	0	0	3	2	4
AMY2B	237.984	-0.876878	0.19989	-4.38679	1.15e-05	0.000104408	160	144	179	299	227	470
AMZ1	2.78714	-0.0147789	0.611054	-0.0241859	0.980704	0.991495	4	3	1	3	2	4
AMZ2	544.542	-0.0624444	0.156782	-0.398287	0.690419	0.834425	495	531	517	692	461	597
AMZ2P1	158.439	0.615487	0.197553	3.11556	0.00183597	0.00922642	205	173	182	145	93	157
ANAPC1	288.351	-0.258598	0.185306	-1.39552	0.16286	0.333987	251	275	233	354	222	432
ANAPC10	123.244	0.144931	0.211291	0.68593	0.492757	0.690512	131	116	130	121	91	160
ANAPC11	1483.55	0.260917	0.149884	1.74079	0.0817201	0.200699	1863	1299	1551	1577	1178	1471
ANAPC13	678.12	0.127484	0.144357	0.883114	0.377175	0.585584	766	651	639	746	557	733
ANAPC15	401.948	0.156168	0.192699	0.810424	0.417696	0.624444	546	329	360	448	330	413
ANAPC16	1127.08	-0.0918936	0.131757	-0.697447	0.485523	0.683935	1133	1006	1026	1311	1042	1291
ANAPC2	1858.87	0.412065	0.141123	2.9199	0.00350147	0.0159879	2226	1800	2155	1771	1524	1655
ANAPC4	384.312	0.00769208	0.164001	0.0469027	0.962591	0.983096	352	413	350	412	312	490
ANAPC5	1281.51	0.315465	0.129399	2.43793	0.0147718	0.0526488	1371	1303	1456	1338	969	1279
ANAPC7	615.014	-0.0642705	0.141698	-0.453575	0.650135	0.807999	625	543	578	730	501	760
ANG	16.8473	1.29959	0.458572	2.834	0.00459695	0.020144	32	26	15	7	7	13
ANGEL1	396.024	-0.360574	0.16096	-2.24014	0.0250817	0.0807751	329	311	365	426	381	606
ANGEL2	316.736	-0.10059	0.159193	-0.631876	0.527468	0.718725	298	306	281	359	284	389
ANGPT1	62.8552	-0.132537	0.307674	-0.430771	0.666635	0.820131	75	55	44	82	36	96
ANGPT2	19.6683	0.551951	0.42097	1.31114	0.18981	0.371272	27	21	22	17	8	25
ANGPT4	6.3731	0.296854	0.569167	0.521559	0.601978	0.773395	3	11	7	5	5	7
ANGPTL1	15.5192	-3.22989	0.543738	-5.94015	2.85e-09	4.6e-08	3	0	0	20	31	43
ANGPTL2	1180.12	1.73111	0.144747	11.9596	5.79e-33	6.29e-31	1602	1701	1981	599	503	581
ANGPTL3	0.644833	0.251159	0.436641	0.575208	0.565151	NA	3	0	0	0	0	1
ANGPTL4	426.55	0.208611	0.193898	1.07588	0.28198	0.485577	579	348	407	473	360	399
ANGPTL5	0.631565	-0.203651	0.434327	-0.468888	0.63915	NA	1	0	0	3	0	0
ANGPTL6	96.9388	0.696367	0.27047	2.57466	0.010034	0.0385764	149	74	131	96	59	74
ANGPTL7	3.05659	-0.129115	0.610714	-0.211416	0.832563	0.916646	3	3	2	1	5	4
ANK1	48.2127	-0.797704	0.36935	-2.15975	0.0307917	0.0947172	52	26	20	68	76	45
ANK2	243.568	-1.40196	0.179816	-7.79664	6.36e-15	1.8e-13	116	121	145	353	321	444
ANK3	1933.87	0.840349	0.143076	5.87345	4.27e-09	6.73e-08	2344	2478	2391	1568	1004	1833
ANKAR	19.5661	-0.193699	0.423428	-0.457453	0.647345	0.806596	16	24	12	20	17	30
ANKDD1A	64.6923	-0.115936	0.272804	-0.424979	0.670852	0.823049	76	54	50	68	58	87
ANKDD1B	3.50807	1.34263	0.610567	2.19898	0.0278791	0.0876785	5	4	9	1	0	2
ANKEF1	34.9625	-0.467075	0.337041	-1.38581	0.165804	0.338498	33	23	28	37	36	57
ANKFN1	1.05929	0.208789	0.520173	0.401385	0.688137	NA	2	0	2	0	2	0
ANKFY1	573.562	-0.0903757	0.145447	-0.621367	0.534358	0.724021	510	525	577	661	464	754
ANKH	444.899	-0.977103	0.169202	-5.77476	7.71e-09	1.17e-07	242	304	315	669	453	764
ANKHD1	83.429	0.720263	0.255388	2.82027	0.00479834	0.0209289	126	77	102	67	59	68
ANKHD1-EIF4EBP3	22.5076	0.152341	0.444153	0.342992	0.731605	0.858907	23	14	33	9	21	37
ANKIB1	287.963	-0.138957	0.169865	-0.818046	0.413331	0.620361	258	275	261	317	237	407
ANKK1	12.224	-0.200282	0.520188	-0.385018	0.700224	0.840807	11	9	12	15	20	4
ANKLE1	128.701	-0.102932	0.207628	-0.495752	0.620069	0.786873	120	106	134	144	125	148
ANKLE2	805.085	-0.0569626	0.138146	-0.412337	0.680093	0.827836	746	726	819	834	681	1088
ANKMY1	126.868	-0.096626	0.217559	-0.444137	0.656943	0.812918	105	114	136	125	131	153
ANKMY2	269.942	0.0287928	0.17614	0.163465	0.870152	0.937549	245	285	260	294	205	351
ANKRA2	184.658	0.151255	0.199547	0.757993	0.448455	0.652967	162	186	217	170	143	242
ANKRD1	512.057	-2.58414	0.610687	-4.23154	NA	NA	5	23	16	366	156	3022
ANKRD10	1281.14	0.0927986	0.129089	0.718873	0.472219	0.673493	1295	1212	1333	1218	1106	1580
ANKRD11	2066.49	-0.103022	0.16324	-0.631106	0.527972	0.719081	1507	1911	2359	2176	1929	2625
ANKRD12	206.998	-0.190388	0.204914	-0.929113	0.35283	0.561801	192	178	191	210	159	342
ANKRD13A	328.432	-0.331333	0.163638	-2.02478	0.0428896	0.12239	323	252	268	373	329	451
ANKRD13B	295.48	1.62054	0.176142	9.2002	3.57e-20	1.59e-18	448	359	499	163	122	163
ANKRD13C	364.746	0.146753	0.17367	0.845012	0.398104	0.606266	338	394	380	360	259	486
ANKRD13D	937.592	0.245171	0.14205	1.72595	0.0843571	0.205646	1084	821	1058	951	769	966
ANKRD16	165.117	-0.27992	0.197943	-1.41414	0.157321	0.326145	140	137	154	201	177	186
ANKRD17	656.88	-0.538702	0.157006	-3.4311	0.000601144	0.00354896	504	533	510	938	562	989
ANKRD18A	8.61623	-0.534862	0.540966	-0.988716	0.322802	0.529493	4	3	12	12	9	13
ANKRD18B	14.6801	-0.583758	0.486071	-1.20097	0.229762	0.422497	16	7	9	11	26	18
ANKRD18DP	0.276515	-0.149727	0.335972	-0.445652	0.655848	NA	0	0	0	0	0	2
ANKRD19P	19.8722	0.178038	0.411314	0.432852	0.665123	0.81899	27	15	20	22	16	20
ANKRD2	1.33654	-0.462692	0.572182	-0.808645	0.418719	NA	1	1	0	3	2	1
ANKRD20A12P	1.85156	-0.525612	0.599265	-0.877095	0.380435	NA	1	1	1	4	3	1
ANKRD20A19P	70.2351	0.439884	0.283959	1.54911	0.121355	0.268498	72	65	101	75	35	80
ANKRD20A4	0.832719	-0.67876	0.49285	-1.37721	0.168446	NA	0	0	0	2	2	1
ANKRD20A9P	0.331253	-0.18007	0.365081	-0.493232	0.621848	NA	0	0	0	0	1	1
ANKRD22	0.679773	0.0178661	0.48601	0.0367608	0.970676	NA	0	1	1	0	1	1
ANKRD23	79.9885	0.183788	0.247556	0.742409	0.45784	0.661073	75	73	100	85	64	86
ANKRD24	69.3492	0.276257	0.256472	1.07714	0.281416	0.484793	80	65	77	63	51	84
ANKRD26	68.9654	-0.61732	0.281706	-2.19136	0.0284257	0.088849	51	50	55	75	60	137
ANKRD26P1	0.414772	-0.240076	0.361316	-0.664449	0.506403	NA	0	0	0	0	0	3
ANKRD27	176.508	0.263276	0.201911	1.30392	0.192261	0.374424	164	214	180	157	139	209
ANKRD28	227.775	-0.145681	0.197782	-0.736575	0.461381	0.664571	192	206	229	211	198	354
ANKRD29	5.84163	-1.17822	0.591922	-1.9905	0.0465356	0.1306	4	1	2	6	15	6
ANKRD30A	0.361854	0.0110667	0.375186	0.0294967	0.976468	NA	1	0	0	0	1	0
ANKRD30BL	5.23018	-0.384883	0.581681	-0.661674	0.50818	0.704007	4	4	4	6	8	5
ANKRD30BP2	0.385991	-0.165878	0.351914	-0.47136	0.637384	NA	0	0	0	0	2	0
ANKRD31	2.67047	-0.317479	0.608071	-0.522109	0.601595	0.773237	2	1	3	8	0	3
ANKRD32	56.9751	0.0348937	0.293816	0.118761	0.905465	0.954942	54	45	69	45	54	78
ANKRD33	18.0595	1.88758	0.459415	4.10866	3.98e-05	0.000323202	36	24	27	3	8	8
ANKRD33B	73.119	-3.13675	0.338016	-9.27989	1.7e-20	7.72e-19	13	12	11	97	113	218
ANKRD34A	37.8946	-1.06687	0.339152	-3.14569	0.00165694	0.00847232	22	16	30	58	51	54
ANKRD34B	0.360785	0.0110456	0.37487	0.0294652	0.976494	NA	0	0	1	0	1	0
ANKRD34C	0.292493	-0.166948	0.352933	-0.473031	0.636191	NA	0	0	0	1	0	1
ANKRD35	19.1122	-0.327319	0.445083	-0.735412	0.462089	0.665323	18	10	20	21	29	15
ANKRD36	33.4151	-0.784538	0.338208	-2.31969	0.0203576	0.0683506	23	23	23	43	37	56
ANKRD36B	14.2596	-0.47875	0.458921	-1.04321	0.296852	0.502406	8	13	12	18	17	18
ANKRD36BP1	14.9658	-0.993696	0.47504	-2.09182	0.0364548	0.108056	8	12	6	17	14	37
ANKRD36BP2	0.623746	-0.518213	0.459457	-1.12788	0.259369	NA	0	0	0	1	1	2
ANKRD36C	13.4224	-0.153468	0.495065	-0.309995	0.756564	0.874193	7	17	12	7	15	23
ANKRD37	55.3985	0.268436	0.28403	0.945097	0.344609	0.553106	61	59	56	58	49	48
ANKRD39	93.2094	-0.0655249	0.24895	-0.263205	0.792393	0.89231	107	75	82	105	98	92
ANKRD40	579.132	-0.400367	0.140706	-2.84541	0.0044354	0.019566	496	469	481	711	533	849
ANKRD42	97.5286	-0.0201049	0.237526	-0.0846432	0.932545	0.968778	93	85	104	102	70	143
ANKRD44	46.2583	-0.0876525	0.303352	-0.288947	0.772622	0.88225	41	46	43	53	33	67
ANKRD44-IT1	0.34852	0.207954	0.370734	0.560926	0.574848	NA	0	1	1	0	0	0
ANKRD45	18.6465	-0.623291	0.422424	-1.47551	0.140075	0.29937	17	11	13	21	19	34
ANKRD46	209.007	-0.334217	0.192062	-1.74015	0.0818324	0.20092	190	166	180	245	169	335
ANKRD49	86.8866	0.633961	0.251425	2.52147	0.0116865	0.0436593	84	97	128	69	65	76
ANKRD50	347.826	0.271929	0.181331	1.49963	0.13371	0.288742	308	416	379	326	248	426
ANKRD52	2415.32	-0.118937	0.160842	-0.739462	0.459626	0.662884	2485	2062	2172	2371	2716	2667
ANKRD53	25.9952	0.892765	0.379353	2.35339	0.0186031	0.0636704	29	29	43	17	14	24
ANKRD54	376.317	0.0378195	0.172188	0.21964	0.826151	0.913029	397	295	418	401	358	397
ANKRD55	1.84299	-0.9946	0.588141	-1.69109	0.0908192	NA	0	1	0	2	2	7
ANKRD6	247.518	-0.724981	0.182395	-3.97478	7.04e-05	0.000537148	163	186	188	294	265	422
ANKRD61	11.6427	-0.450883	0.503284	-0.895882	0.370316	0.579096	8	11	8	7	14	23
ANKRD63	17.162	-3.63335	0.56506	-6.43002	1.28e-10	2.4e-09	0	1	0	28	52	19
ANKRD65	88.8406	0.586547	0.246574	2.37879	0.0173698	0.0601651	107	87	118	80	70	68
ANKRD7	4.50951	-0.419094	0.594748	-0.704659	0.481022	0.680012	2	3	5	7	6	4
ANKRD9	359.926	-0.769378	0.185949	-4.13758	3.51e-05	0.000289945	293	193	283	520	436	461
ANKS1A	569.238	-0.948044	0.149596	-6.33734	2.34e-10	4.26e-09	339	373	408	784	621	979
ANKS1B	181.132	1.34197	0.239756	5.59721	2.18e-08	3.15e-07	238	276	247	148	55	117
ANKS3	577.288	0.347633	0.163746	2.123	0.0337534	0.101877	698	535	650	537	512	521
ANKS6	609.516	0.0534496	0.145015	0.368579	0.712441	0.847149	551	568	684	657	518	707
ANKZF1	910.815	0.183297	0.132413	1.38428	0.166272	0.339143	960	837	1020	923	767	983
ANLN	157.586	-0.217586	0.227751	-0.955368	0.339392	0.547308	109	167	143	157	176	194
ANO1	9.36476	-1.80748	0.542161	-3.33384	0.000856559	0.00479797	3	3	2	12	16	22
ANO10	303.448	0.104375	0.171451	0.608772	0.542675	0.730682	331	270	313	348	264	301
ANO2	6.42654	-0.586472	0.573826	-1.02204	0.306763	0.513624	1	7	5	11	7	8
ANO3	1.4432	-0.000565411	0.560955	-0.00100794	0.999196	NA	0	3	1	1	3	0
ANO4	12.9363	-2.30979	0.539787	-4.27909	1.88e-05	0.000163506	1	5	1	32	25	14
ANO5	79.1457	-0.614805	0.250516	-2.45416	0.0141215	0.0508185	69	47	64	97	83	125
ANO6	732.143	0.399978	0.183367	2.1813	0.0291612	0.0906578	680	864	876	704	417	905
ANO7	31.1082	-0.735355	0.358633	-2.05044	0.0403216	0.116743	17	27	21	40	40	43
ANO8	2259.78	1.04071	0.156739	6.6398	3.14e-11	6.29e-10	2690	2655	3531	1768	1329	1476
ANO9	200.064	1.56784	0.201634	7.77567	7.5e-15	2.12e-13	288	241	350	109	73	132
ANOS1	261.624	-0.524773	0.232513	-2.25697	0.0240102	0.0780215	261	172	187	364	176	470
ANP32A	1660.06	-0.695755	0.132275	-5.25992	1.44e-07	1.85e-06	1248	1183	1232	2263	1944	2203
ANP32A-IT1	7.30602	-1.19969	0.585013	-2.05071	0.0402949	0.116684	1	1	7	6	18	10
ANP32AP1	1.02329	-0.47619	0.516881	-0.921276	0.356907	NA	0	0	1	0	3	2
ANP32B	1042.14	-0.12158	0.159337	-0.763037	0.445442	0.650076	1192	871	834	1160	1008	1230
ANP32C	0.566722	-0.136038	0.418569	-0.325008	0.745175	NA	0	1	0	0	2	0
ANP32E	490.123	-0.323568	0.14914	-2.16956	0.0300402	0.092886	400	429	430	546	507	657
ANPEP	20.2716	0.484443	0.40765	1.18838	0.234683	0.42907	19	24	27	15	14	23
ANTXR1	795.609	-0.061355	0.147545	-0.415839	0.677528	0.826664	679	784	793	888	635	1061
ANTXR2	485.767	-0.488849	0.163831	-2.98386	0.0028464	0.0134194	439	377	353	564	457	789
ANTXRL	0.849987	-0.114917	0.512131	-0.224389	0.822455	NA	0	1	1	2	1	0
ANXA1	1008.8	0.905952	0.215275	4.20835	2.57e-05	0.000217126	896	1429	1506	654	788	677
ANXA11	1502.92	0.346143	0.157614	2.19613	0.0280823	0.0881	1754	1456	1687	1453	1348	1275
ANXA13	2.52654	0.740223	0.610459	1.21257	0.225295	0.416811	5	4	2	1	1	2
ANXA2	5220.5	0.818521	0.156385	5.23402	1.66e-07	2.11e-06	5586	6673	7113	4077	3767	3775
ANXA2P1	1.20813	-0.381721	0.560635	-0.680873	0.495952	NA	1	0	1	1	3	1
ANXA2P2	32.3046	0.611903	0.355958	1.71903	0.0856085	0.207816	30	44	41	21	21	37
ANXA2R	8.67308	0.169484	0.541188	0.313169	0.754152	0.873127	13	8	6	10	10	4
ANXA3	295.867	-0.313449	0.222921	-1.4061	0.159695	0.329506	177	320	260	295	328	403
ANXA4	418.409	0.251692	0.150655	1.67065	0.0947908	0.224336	437	442	442	419	303	488
ANXA5	2342.08	0.0643379	0.133212	0.482972	0.629115	0.793609	2351	2262	2333	2567	2164	2396
ANXA6	8006.14	0.140834	0.153986	0.914593	0.360405	0.570146	9257	7021	8160	8448	7629	7447
ANXA7	353.957	-0.260742	0.171409	-1.52117	0.128216	0.280041	318	330	283	477	295	453
ANXA8	112.364	3.97346	0.359342	11.0576	2.01e-28	1.6e-26	100	239	282	10	7	15
ANXA8L1	164.767	3.73287	0.482506	7.73644	1.02e-14	2.86e-13	124	393	397	14	13	11
ANXA9	60.4983	-0.576768	0.269	-2.14412	0.0320232	0.0977298	45	45	49	83	65	81
AOAH	2.61961	-0.296554	0.605712	-0.489595	0.62442	0.790218	5	0	1	2	1	8
AOC1	2.85111	-0.199756	0.610736	-0.327075	0.743611	0.866531	4	3	0	2	4	4
AOC2	49.1102	-0.673171	0.309758	-2.17322	0.029764	0.0921758	40	36	31	55	69	64
AOC3	111.75	-0.223397	0.216439	-1.03215	0.302003	0.508277	101	86	112	123	107	150
AOC4P	2.37191	0.427234	0.610053	0.700322	0.483726	0.682178	3	2	4	2	2	1
AOX1	4.70678	-0.12098	0.607228	-0.199234	0.84208	0.921847	8	0	5	7	1	9
AOX2P	0.799355	-0.090945	0.485966	-0.187143	0.851549	NA	1	0	1	3	0	0
AP1AR	198.12	-0.0140196	0.21012	-0.0667221	0.946803	0.975575	166	234	169	200	162	270
AP1B1	1566.72	-0.164714	0.160216	-1.02807	0.303916	0.510485	1517	1176	1603	1928	1598	1615
AP1B1P1	0.361462	0.178365	0.346126	0.515319	0.60633	NA	0	2	0	0	0	0
AP1G1	632.045	-0.0675803	0.140572	-0.480754	0.630691	0.794714	621	579	591	734	508	811
AP1G2	2489.86	1.07389	0.120108	8.94103	3.86e-19	1.57e-17	3310	2951	3574	1737	1383	1903
AP1M1	1108.64	0.179551	0.142678	1.25843	0.208237	0.394341	1161	1020	1244	1241	920	1089
AP1M2	20.9504	0.41806	0.4314	0.969078	0.332506	0.540173	21	23	27	8	18	29
AP1S1	588.451	0.903926	0.180565	5.00609	5.55e-07	6.55e-06	925	615	703	509	355	406
AP1S2	684.119	-0.686371	0.145856	-4.70581	2.53e-06	2.65e-05	573	477	465	902	776	971
AP1S3	22.0724	0.0193186	0.402018	0.0480542	0.961673	0.982792	26	13	26	21	20	28
AP2A1	3054.36	-0.00770707	0.140651	-0.0547956	0.956301	0.980378	3033	2712	3102	3428	2982	3091
AP2A2	1153.54	0.0630658	0.125746	0.501532	0.615997	0.78384	1138	1058	1228	1197	1010	1335
AP2B1	1429.07	-0.390978	0.134741	-2.90169	0.00371151	0.0167964	1323	1110	1150	1781	1508	1782
AP2M1	4627.59	0.172384	0.151009	1.14154	0.253645	0.451817	5172	4211	4883	4783	4394	4254
AP2S1	1163.52	0.479861	0.18816	2.55028	0.0107637	0.0408014	1685	968	1313	1156	915	932
AP3B1	362.727	0.0629415	0.153574	0.409844	0.681921	0.82876	351	338	387	385	323	403
AP3B2	29.0049	0.777613	0.360061	2.15967	0.0307984	0.0947213	43	28	38	21	18	26
AP3D1	2667.59	0.131755	0.117916	1.11736	0.26384	0.464198	2697	2501	2907	2829	2203	2972
AP3M1	426.556	-0.0881694	0.151627	-0.581487	0.560912	0.743893	370	400	429	475	361	556
AP3M2	179.77	-0.0542758	0.190403	-0.285058	0.7756	0.88397	191	159	162	221	149	208
AP3S1	490.745	0.239857	0.155229	1.54518	0.122302	0.270118	565	479	500	492	431	476
AP3S2	12.6817	1.14183	0.4847	2.35575	0.0184853	0.0633522	24	13	17	7	5	10
AP4B1	306.991	0.0235473	0.180971	0.130117	0.896474	0.950854	357	272	271	352	223	396
AP4B1-AS1	99.4805	-0.42014	0.237369	-1.76998	0.0767297	0.191133	73	76	97	125	83	158
AP4E1	154.139	-0.213468	0.203378	-1.04961	0.293898	0.499302	135	147	131	183	123	223
AP4M1	451.591	0.795225	0.147343	5.39709	6.77e-08	9.1e-07	594	514	561	376	282	375
AP4S1	119.813	-0.471118	0.216487	-2.17619	0.0295408	0.0915959	95	106	88	158	111	174
AP5B1	298.938	-0.087605	0.171727	-0.510141	0.609952	0.778757	271	265	304	316	309	332
AP5M1	208.45	-0.580136	0.195342	-2.96985	0.0029795	0.0139583	132	183	165	252	222	316
AP5S1	132.924	0.362169	0.218789	1.65533	0.0978569	0.229551	137	125	175	146	87	134
AP5Z1	1421.2	0.602183	0.142465	4.22687	2.37e-05	0.000201919	1752	1429	1814	1194	1094	1211
APAF1	301.16	0.303677	0.17606	1.72485	0.0845552	0.205904	276	355	334	281	223	347
APBA1	39.4499	-1.49273	0.366182	-4.07646	4.57e-05	0.00036636	29	15	11	71	60	54
APBA2	324.675	0.587795	0.16838	3.49088	0.000481437	0.00291263	385	366	383	300	243	261
APBA3	396.284	0.0687152	0.162999	0.421569	0.67334	0.824795	418	353	408	467	344	398
APBB1	1732.82	-0.231339	0.157166	-1.47194	0.141036	0.300918	1816	1317	1496	2086	1834	1891
APBB1IP	7.81236	1.18392	0.562359	2.10527	0.0352674	0.105445	12	11	12	1	2	9
APBB2	299.205	0.141032	0.192246	0.733605	0.463189	0.666316	253	322	336	336	196	378
APBB3	749.391	0.587906	0.142106	4.13709	3.52e-05	0.000290295	829	784	1009	638	522	718
APC	220.808	0.140519	0.18401	0.763645	0.445079	0.649962	257	197	220	201	183	279
APC2	370.939	0.40527	0.174557	2.32171	0.0202486	0.0681177	391	388	450	348	323	313
APCDD1	157.443	-0.498714	0.198249	-2.51559	0.0118832	0.0442662	124	111	142	216	164	200
APCDD1L	522.43	-2.6614	0.433316	-6.14193	8.15e-10	1.41e-08	120	76	117	894	1307	569
APCDD1L-AS1	13.8481	-1.83945	0.501122	-3.67066	0.000241929	0.00158516	4	3	6	19	30	21
APEH	1248.54	0.17984	0.157825	1.13949	0.254498	0.452719	1511	1105	1244	1347	1112	1176
APELA	191.341	-1.1187	0.195709	-5.71611	1.09e-08	1.63e-07	114	121	109	266	264	289
APEX1	4082.62	0.36314	0.142022	2.55693	0.0105602	0.0401955	5191	4054	4118	4007	3314	3796
APEX2	316.853	0.26281	0.170218	1.54396	0.122597	0.270608	365	293	348	340	261	297
APH1A	2118.58	0.537538	0.165893	3.24026	0.0011942	0.00640175	3088	2097	2130	1833	1672	1847
APH1B	179.544	-0.121601	0.194208	-0.62614	0.531223	0.721166	180	155	164	173	162	258
API5	899.577	-0.262648	0.142775	-1.83959	0.065828	0.169757	776	820	771	1084	755	1288
APIP	208.446	-0.0894427	0.187439	-0.477184	0.633231	0.796349	224	193	168	243	189	243
APITD1	18.8069	0.441382	0.430354	1.02563	0.305068	0.511595	24	18	22	17	19	11
APITD1-CORT	1.01946	0.248772	0.530977	0.468516	0.639415	NA	1	0	3	1	1	0
APLF	26.551	-0.408966	0.377169	-1.0843	0.278231	0.480978	23	24	18	33	20	46
APLN	23.9457	1.17434	0.409238	2.86957	0.00411034	0.0183224	28	36	35	15	17	9
APLNR	272.853	-2.27158	0.283484	-8.01308	1.12e-15	3.38e-14	70	87	93	395	641	326
APLP1	1560.46	0.0476431	0.170527	0.279387	0.779948	0.886241	1748	1247	1625	1930	1403	1438
APLP2	9626.42	0.0427835	0.129219	0.331092	0.740575	0.864169	8338	9482	10512	10473	8054	11365
APMAP	2022.73	0.2506	0.12511	2.00304	0.0451729	0.127578	2253	1899	2242	2108	1603	2086
APOA1	262.278	0.520195	0.221232	2.35136	0.0187048	0.0639572	409	216	281	269	187	213
APOA1-AS	121.76	0.277876	0.253845	1.09467	0.273662	0.475615	183	86	122	117	104	121
APOA1BP	1671.96	0.517287	0.142067	3.64114	0.000271437	0.00175624	2088	1719	1925	1704	1141	1466
APOA2	1.29623	-0.79653	0.51474	-1.54744	0.121757	NA	0	0	0	0	6	1
APOA4	0.813978	0.140875	0.490858	0.286997	0.774115	NA	2	0	1	2	0	0
APOB	17.9963	-0.703951	0.462681	-1.52146	0.128144	0.279943	17	10	10	15	34	20
APOBEC2	165.755	-4.41021	0.280344	-15.7314	9.21e-56	2.45e-53	12	11	13	297	305	397
APOBEC3A	1.57013	0.0896091	0.569327	0.157395	0.874934	NA	1	3	1	0	0	5
APOBEC3B	35.4118	1.07338	0.349303	3.07293	0.00211971	0.0104607	44	39	60	30	18	20
APOBEC3B-AS1	17.9588	1.59299	0.452547	3.52006	0.000431448	0.00264702	35	25	22	7	10	6
APOBEC3C	433.754	0.797197	0.174626	4.56517	4.99e-06	4.87e-05	528	477	601	343	323	306
APOBEC3D	71.0934	0.203454	0.258508	0.787034	0.431262	0.637405	83	63	76	82	55	70
APOBEC3F	257.16	-0.0324026	0.18565	-0.174536	0.861445	0.93287	269	232	236	303	252	252
APOBEC3G	73.0998	-0.20797	0.253401	-0.820717	0.411807	0.619221	70	60	66	90	74	81
APOBEC3H	0.865679	0.14076	0.51389	0.27391	0.784153	NA	2	1	0	1	1	0
APOBR	3.67294	-0.275502	0.607714	-0.453342	0.650302	0.80812	2	1	6	3	3	8
APOC1	122.189	0.381433	0.296019	1.28855	0.197556	0.381495	204	89	113	118	120	82
APOC1P1	2.08529	0.0296153	0.603914	0.0490389	0.960888	0.982516	1	4	1	2	3	1
APOC3	0.976592	0.286318	0.528174	0.542091	0.587756	NA	0	1	3	1	0	1
APOC4-APOC2	0.791535	-0.381288	0.507015	-0.752025	0.452036	NA	0	0	1	1	1	2
APOE	29359.5	0.81469	0.1551	5.25269	1.5e-07	1.92e-06	41656	28724	39073	25386	19219	21363
APOL1	4.85293	0.323922	0.597956	0.541714	0.588015	0.763719	10	2	5	7	1	5
APOL2	282.306	0.6912	0.166331	4.15557	3.24e-05	0.000270042	337	299	381	234	192	248
APOL3	1.6333	0.514885	0.59105	0.871137	0.38368	NA	2	2	3	1	0	2
APOL4	0.96107	0.0595072	0.528308	0.112637	0.910318	NA	1	2	0	1	0	2
APOL5	5.07426	-0.453168	0.586231	-0.773019	0.439511	0.644946	3	5	3	6	8	5
APOL6	3.44902	0.139632	0.611039	0.228517	0.819245	0.908715	8	3	0	4	2	4
APOLD1	16.257	-1.71339	0.492159	-3.48136	0.000498865	0.00300583	9	7	1	29	30	22
APOM	202.748	-0.123227	0.189399	-0.650624	0.515289	0.709907	174	199	188	198	204	260
APOO	335.272	-0.2561	0.186159	-1.3757	0.168914	0.343275	360	266	259	428	343	367
APOOL	140.19	-0.755851	0.20769	-3.63932	0.000273355	0.00176449	85	108	106	190	150	219
APOOP5	0.306047	0.00990987	0.357212	0.0277422	0.977868	NA	0	0	1	0	0	1
APOPT1	340.13	0.41101	0.172365	2.38453	0.0171011	0.0593843	423	340	367	339	274	293
APP	10894.1	0.114663	0.167056	0.686375	0.492477	0.690459	8424	11713	12685	12080	7841	13380
APPBP2	470.899	0.127376	0.147795	0.86184	0.388775	0.596669	457	490	479	475	374	574
APPL1	208.868	-0.150492	0.191556	-0.785627	0.432086	0.637935	173	199	201	202	192	302
APPL2	486.416	0.059085	0.16696	0.353886	0.723424	0.854505	517	437	490	571	328	626
APRT	775.951	0.386165	0.188942	2.04382	0.0409709	0.118048	1106	633	832	829	590	676
APTR	116.395	-0.325295	0.245196	-1.32667	0.184618	0.364635	95	127	74	129	119	160
APTX	277.581	0.0382305	0.163133	0.234352	0.814711	0.90615	292	241	285	302	228	335
AQP1	2934.84	2.48975	0.207027	12.0262	2.59e-33	2.88e-31	3621	5036	5896	1234	583	876
AQP10	115.052	-1.10962	0.261475	-4.2437	2.2e-05	0.000188163	102	44	61	163	147	189
AQP11	26.1566	-0.223757	0.385042	-0.581124	0.561157	0.744017	25	16	29	33	17	42
AQP12A	1.01642	0.291669	0.546848	0.533364	0.593781	NA	1	1	2	0	1	1
AQP12B	0.656705	0.294007	0.463628	0.634144	0.525987	NA	2	1	0	0	0	1
AQP2	0.666219	-0.265865	0.484375	-0.548884	0.583085	NA	0	1	0	1	1	1
AQP3	181.326	0.883912	0.242158	3.65015	0.000262091	0.00170226	305	182	204	176	104	112
AQP4	20.7617	0.344471	0.418383	0.823338	0.410316	0.617774	18	32	18	17	14	26
AQP4-AS1	1.64252	0.274165	0.590094	0.464612	0.642209	NA	2	2	2	0	1	3
AQP5	9.754	-0.505929	0.523968	-0.965573	0.334258	0.541532	11	3	8	15	12	10
AQP6	13.7102	-0.0376912	0.514195	-0.0733014	0.941566	0.973103	22	8	9	7	23	11
AQP7	31.705	1.75254	0.361232	4.85156	1.22e-06	1.36e-05	50	45	51	12	13	16
AQP7P1	2.20453	-0.031181	0.591924	-0.0526773	0.957989	0.981199	1	5	0	0	3	4
AQP7P3	2.17629	-0.442668	0.602972	-0.734144	0.462861	0.66595	0	2	2	1	4	4
AQP8	6.1276	-0.67777	0.568502	-1.1922	0.233182	0.42685	5	2	5	10	6	10
AQP9	2.30392	-0.155492	0.355732	-0.437105	0.662035	0.816891	3	0	0	0	0	13
AQR	258.3	-0.0855775	0.174216	-0.491214	0.623275	0.789357	256	252	218	288	213	343
AR	26.9847	-0.253274	0.381979	-0.663059	0.507293	0.703343	22	28	20	36	31	24
ARAF	1254.3	-0.0171273	0.143666	-0.119216	0.905104	0.95484	1385	1059	1180	1473	1119	1359
ARAP1	1263.94	-0.506696	0.130446	-3.88435	0.000102603	0.000749664	1040	916	1070	1543	1398	1703
ARAP2	128.677	1.80311	0.26179	6.88759	5.67e-12	1.22e-10	177	205	207	73	25	79
ARAP3	248.593	-0.508937	0.200957	-2.53257	0.0113229	0.0425323	175	222	192	323	300	282
ARC	12.4876	1.01589	0.484311	2.0976	0.0359409	0.106941	21	18	12	7	7	9
ARCN1	1466.93	0.0796729	0.140881	0.565534	0.57171	0.751689	1370	1470	1533	1644	1063	1837
AREG	1.52047	0.881993	0.572882	1.53957	0.123664	NA	1	3	4	0	0	1
AREL1	478.161	-0.151835	0.150345	-1.00991	0.312539	0.519494	429	414	472	548	392	662
ARF1	4717.21	0.0868926	0.122427	0.709751	0.477859	0.677527	4844	4283	4995	5048	4210	5034
ARF3	2869.49	0.0512259	0.157662	0.324909	0.74525	0.86772	3119	2599	2765	2809	3005	2864
ARF4	1793.86	0.105099	0.128247	0.819501	0.412501	0.619625	1696	1823	1873	1893	1393	2191
ARF5	3208.25	0.549258	0.169896	3.23291	0.00122534	0.00654898	4754	2900	3485	3064	2337	2698
ARF6	869.464	0.117263	0.134813	0.869817	0.384401	0.592091	891	906	825	903	729	990
ARFGAP1	4575.78	0.503268	0.127764	3.93904	8.18e-05	0.000613825	5441	4698	5478	4111	3580	4078
ARFGAP2	1769.08	0.0546804	0.149499	0.365758	0.714546	0.848668	2070	1514	1658	1918	1643	1843
ARFGAP3	281.887	-0.23731	0.166185	-1.42799	0.153295	0.319992	236	256	257	316	254	397
ARFGEF1	381.943	-0.363408	0.165698	-2.19319	0.0282934	0.0886219	293	319	355	425	353	590
ARFGEF2	250.947	-0.146525	0.219669	-0.667026	0.504756	0.701115	207	241	242	275	161	422
ARFGEF3	15.2837	-1.05631	0.489162	-2.15942	0.0308176	0.0947479	4	10	11	17	31	17
ARFIP1	216.962	-0.140843	0.182074	-0.77355	0.439197	0.644539	186	191	222	245	176	304
ARFIP2	979.051	0.379213	0.136177	2.78471	0.00535749	0.0228919	1190	916	1119	941	732	1001
ARFRP1	666.487	0.1953	0.162113	1.20472	0.228312	0.420786	807	599	664	660	616	650
ARG1	2.55709	0.109937	0.608617	0.180633	0.856655	0.930705	2	2	4	0	4	3
ARG2	439.995	0.31915	0.16782	1.90174	0.0572054	0.152848	507	465	446	430	390	390
ARGFX	0.292493	-0.166948	0.352933	-0.473031	0.636191	NA	0	0	0	1	0	1
ARGFXP2	2.0585	0.0306806	0.600329	0.0511063	0.959241	0.98199	3	3	0	1	3	2
ARGLU1	1496.49	-0.137872	0.149249	-0.923775	0.355604	0.564754	1287	1355	1490	1662	1158	2202
ARHGAP1	1834.49	-0.757924	0.131549	-5.76154	8.34e-09	1.26e-07	1251	1247	1444	2345	2188	2688
ARHGAP10	483.569	2.04678	0.169521	12.0739	1.45e-33	1.65e-31	808	684	785	229	125	234
ARHGAP11A	69.3342	-1.18337	0.287287	-4.11913	3.8e-05	0.000310852	46	44	28	92	104	106
ARHGAP11B	3.38851	-1.19596	0.610662	-1.95846	0.0501764	0.138211	1	2	0	6	5	7
ARHGAP12	210.154	0.0688194	0.194794	0.353294	0.723868	0.85456	241	201	183	195	170	286
ARHGAP15	1.26773	0.28016	0.555226	0.504588	0.613848	NA	1	1	3	0	0	3
ARHGAP17	617.287	0.402337	0.156594	2.5693	0.0101904	0.0391189	631	687	725	621	385	686
ARHGAP18	25.5657	0.955839	0.390548	2.44743	0.014388	0.051611	24	41	35	19	16	16
ARHGAP19	146.428	-0.0573858	0.217539	-0.263796	0.791937	0.89231	119	166	129	145	135	190
ARHGAP20	17.0123	1.26805	0.45427	2.79141	0.00524791	0.0225123	15	30	28	10	6	12
ARHGAP21	511.047	-0.237626	0.180465	-1.31674	0.187925	0.369287	420	489	447	587	381	815
ARHGAP22	1332.58	1.50448	0.206899	7.27158	3.55e-13	8.57e-12	2097	1649	2035	1046	417	703
ARHGAP23	2587.27	0.482342	0.151933	3.17471	0.00149986	0.00777165	2377	2960	3426	2351	1931	2465
ARHGAP24	179.905	1.40967	0.228866	6.15936	7.3e-10	1.27e-08	214	285	266	105	59	145
ARHGAP25	18.6126	-0.0108627	0.446489	-0.0243292	0.98059	0.991495	25	13	16	10	19	30
ARHGAP26	187.89	-0.635577	0.203117	-3.12912	0.0017533	0.00887804	138	144	142	240	162	336
ARHGAP27	145.139	-0.00623676	0.221062	-0.0282127	0.977492	0.990535	149	123	148	132	162	154
ARHGAP28	263.43	1.3099	0.209405	6.25531	3.97e-10	7.08e-09	291	407	398	174	98	204
ARHGAP29	266.795	1.24596	0.226204	5.50814	3.63e-08	5.06e-07	265	431	399	141	119	235
ARHGAP30	21.1568	-0.17752	0.442944	-0.400772	0.688588	0.832946	21	21	15	12	16	46
ARHGAP31	547.546	-0.493719	0.139719	-3.53366	0.000409853	0.00252844	463	409	445	725	544	752
ARHGAP31-AS1	7.83932	-0.0780856	0.535231	-0.145891	0.884007	0.945107	6	7	9	8	6	12
ARHGAP32	263.233	-0.0230902	0.220029	-0.104942	0.916422	0.960142	189	270	298	284	176	396
ARHGAP33	978.124	0.846031	0.190063	4.45131	8.53e-06	7.97e-05	954	1232	1477	757	720	657
ARHGAP35	1201.1	-0.163216	0.135046	-1.2086	0.226818	0.418811	1013	1127	1141	1275	1144	1573
ARHGAP36	28.2398	0.523031	0.445543	1.17392	0.240427	0.436218	62	24	14	33	11	28
ARHGAP39	960.122	-0.00208368	0.143021	-0.014569	0.988376	0.994828	916	871	998	1116	884	997
ARHGAP4	780.943	0.551432	0.14587	3.78029	0.000156646	0.0010791	975	750	983	713	563	703
ARHGAP40	1.41603	0.235956	0.559842	0.421469	0.673413	NA	1	4	0	0	2	1
ARHGAP42	244.402	-0.865682	0.216439	-3.99966	6.34e-05	0.00049019	140	198	156	279	256	480
ARHGAP44	348.708	0.470493	0.15391	3.05695	0.00223604	0.01092	384	377	417	299	262	355
ARHGAP5	514.062	-0.0224495	0.171186	-0.13114	0.895664	0.950587	469	522	487	568	362	733
ARHGAP5-AS1	52.5871	0.173842	0.298137	0.583093	0.559831	0.743564	72	42	49	59	41	55
ARHGAP6	532.883	1.02476	0.218218	4.69606	2.65e-06	2.76e-05	463	811	808	388	238	483
ARHGAP8	0.34852	0.207954	0.370734	0.560926	0.574848	NA	0	1	1	0	0	0
ARHGAP9	14.7933	-0.451371	0.469184	-0.962035	0.336032	0.543398	16	11	8	14	12	31
ARHGDIA	5880.89	0.540811	0.151724	3.56444	0.000364633	0.00227624	7571	5573	7199	5991	4084	4883
ARHGDIB	215.674	1.19453	0.215441	5.54457	2.95e-08	4.16e-07	243	319	313	161	123	115
ARHGDIG	18.6766	0.9734	0.448055	2.1725	0.0298179	0.0923269	25	16	34	9	16	10
ARHGEF1	1785.68	0.500264	0.140126	3.57011	0.000356832	0.0022338	1929	1808	2357	1674	1337	1602
ARHGEF10	354.891	0.0983648	0.178546	0.550923	0.581687	0.759194	311	371	383	402	242	451
ARHGEF10L	744.757	-0.35873	0.156111	-2.29792	0.0215666	0.0716143	604	597	688	848	858	890
ARHGEF11	1083.7	-0.203996	0.131173	-1.55517	0.119905	0.265785	1007	900	1015	1173	1090	1370
ARHGEF12	578.616	-0.251515	0.15165	-1.65852	0.0972121	0.228399	492	543	493	679	494	829
ARHGEF15	23.5045	-2.31539	0.503777	-4.59607	4.31e-06	4.28e-05	4	5	6	26	74	19
ARHGEF16	85.9827	-0.740342	0.301044	-2.45925	0.0139228	0.050337	82	43	58	115	131	84
ARHGEF17	4267.38	0.535869	0.137858	3.88711	0.000101445	0.000742114	4268	4781	5637	3750	2833	4424
ARHGEF18	1126.56	0.293831	0.142245	2.06567	0.0388595	0.113412	1147	1178	1278	1127	963	1055
ARHGEF19	81.4116	0.208492	0.257183	0.810677	0.417551	0.624384	86	72	96	72	83	77
ARHGEF2	780.412	-0.603512	0.152067	-3.96873	7.23e-05	0.000549308	694	509	591	1008	899	1035
ARHGEF25	180.187	0.181997	0.222499	0.817971	0.413374	0.620374	158	179	219	179	184	154
ARHGEF26	111.495	0.0262479	0.243588	0.107755	0.91419	0.959093	100	114	113	123	68	166
ARHGEF26-AS1	5.77706	-0.101951	0.581244	-0.175402	0.860764	0.932836	8	2	6	3	7	9
ARHGEF28	41.5172	-0.735521	0.325071	-2.26265	0.0236573	0.077114	37	30	21	62	41	64
ARHGEF3	852.411	1.9401	0.412532	4.7029	2.56e-06	2.68e-05	1041	1578	1443	416	121	447
ARHGEF33	15.3026	-0.0260501	0.444156	-0.0586508	0.95323	0.978661	12	14	18	15	13	21
ARHGEF34P	22.5128	0.319861	0.41095	0.778346	0.436365	0.641938	14	31	28	20	20	21
ARHGEF35	30.825	0.557064	0.349036	1.59601	0.110487	0.250648	31	38	39	24	21	32
ARHGEF37	59.3619	1.11139	0.287353	3.86767	0.000109878	0.000792109	66	82	91	47	27	41
ARHGEF38	1.3358	0.0167552	0.562389	0.0297928	0.976232	NA	2	0	2	0	2	2
ARHGEF39	349.681	-0.123625	0.175902	-0.702803	0.482178	0.681215	381	261	332	446	286	423
ARHGEF4	418.672	0.0573357	0.186324	0.30772	0.758295	0.874843	396	361	484	399	450	412
ARHGEF40	1769.31	-0.136943	0.133162	-1.02839	0.303765	0.510376	1609	1527	1754	2014	1767	1994
ARHGEF5	117.021	0.664749	0.215263	3.08809	0.00201451	0.0100108	143	141	135	101	68	116
ARHGEF6	41.7875	-1.98287	0.339003	-5.84913	4.94e-09	7.76e-08	13	15	16	66	70	76
ARHGEF7	574.449	-0.0309454	0.143463	-0.215703	0.82922	0.914829	566	511	574	662	451	731
ARHGEF7-AS2	2.38882	0.343925	0.607126	0.56648	0.571068	0.751272	4	1	4	2	0	4
ARHGEF9	487.649	-0.757615	0.148835	-5.09029	3.58e-07	4.36e-06	365	333	348	641	585	692
ARHGEF9-IT1	0.308471	-0.149727	0.335972	-0.445652	0.655848	NA	0	0	0	2	0	0
ARID1A	2128.27	-0.434259	0.154729	-2.80658	0.00500699	0.021638	1405	1930	1887	2581	2082	3079
ARID1B	708.71	-0.10205	0.157425	-0.648249	0.516824	0.711067	578	715	684	702	685	916
ARID2	341.167	0.0720427	0.167637	0.429754	0.667375	0.820714	349	325	342	320	269	469
ARID3A	885.127	-0.217105	0.192183	-1.12968	0.25861	0.457843	579	924	856	894	967	1101
ARID3B	1376.17	0.134211	0.147268	0.911344	0.362114	0.57143	1393	1319	1470	1278	1350	1434
ARID3C	19.121	-0.749732	0.454361	-1.65008	0.0989269	0.231274	23	9	7	21	19	40
ARID4A	144.283	0.196888	0.214711	0.916992	0.359147	0.568648	137	133	179	120	122	181
ARID4B	416.869	0.529866	0.161557	3.27974	0.00103903	0.00569311	466	504	461	343	273	464
ARID5A	98.0898	-0.178842	0.239274	-0.747437	0.4548	0.658603	97	84	86	105	75	155
ARID5B	278.673	1.73477	0.212487	8.16412	3.24e-16	1.02e-14	363	429	463	134	76	194
ARIH1	593.892	-0.231629	0.165438	-1.40009	0.161486	0.332038	452	551	578	752	472	824
ARIH2	951.156	-0.237715	0.139149	-1.70835	0.0875708	0.211057	849	791	893	1128	787	1368
ARIH2OS	72.6772	-0.0210789	0.253716	-0.0830805	0.933788	0.969519	60	71	78	76	66	88
ARL1	661.703	0.0867715	0.141915	0.611433	0.540913	0.729025	665	670	642	680	516	840
ARL10	61.4403	-1.10063	0.296073	-3.71743	0.000201263	0.0013496	36	34	40	87	54	135
ARL11	1.92961	0.463332	0.596699	0.776491	0.437459	NA	5	1	2	1	0	3
ARL13A	2.66435	0.055992	0.604001	0.092702	0.92614	0.964876	0	4	4	0	3	5
ARL13B	94.3533	0.082959	0.255258	0.325001	0.74518	0.86772	82	113	86	84	72	136
ARL14EP	222.657	-0.0358794	0.177573	-0.202054	0.839875	0.920379	215	200	224	243	173	302
ARL15	72.3829	-0.281748	0.311541	-0.904367	0.365801	0.574807	31	79	77	80	70	102
ARL16	518.376	0.0957211	0.165807	0.577303	0.563735	0.746212	536	462	560	654	393	533
ARL17A	103.167	-0.0131478	0.235274	-0.0558829	0.955435	0.97994	105	75	119	103	100	121
ARL2	223.118	-0.575946	0.258407	-2.22883	0.0258252	0.0827006	257	132	126	274	300	250
ARL2BP	1006.36	-0.0961445	0.134156	-0.71666	0.473584	0.674469	894	964	960	1201	874	1202
ARL3	671.375	-0.0153867	0.151457	-0.101592	0.919081	0.961396	692	627	617	760	643	697
ARL4A	69.2256	0.699311	0.26463	2.6426	0.00822722	0.032658	73	91	86	59	49	54
ARL4C	452.882	-0.483026	0.161227	-2.99594	0.00273602	0.0129676	355	367	370	516	426	743
ARL4D	1295.51	0.848576	0.184797	4.59194	4.39e-06	4.35e-05	2192	1319	1362	1084	805	983
ARL5A	371.917	0.20149	0.191498	1.05218	0.292718	0.498151	309	449	394	355	264	483
ARL5B	102.654	-0.422937	0.286264	-1.47744	0.139559	0.298481	65	118	67	125	76	182
ARL6	29.6568	-0.203085	0.366642	-0.553906	0.579643	0.757858	36	17	27	35	24	43
ARL6IP1	1267.28	-0.092337	0.124329	-0.742682	0.457674	0.660941	1157	1193	1205	1412	1139	1566
ARL6IP4	2462.99	0.155481	0.174045	0.893336	0.371677	0.580004	3198	2001	2368	2660	2255	2304
ARL6IP5	800.911	-0.178622	0.14852	-1.20268	0.229101	0.421761	662	779	731	888	809	959
ARL6IP6	288.429	0.0532926	0.179635	0.296671	0.766718	0.878939	269	259	327	312	205	388
ARL8A	1189.39	0.814425	0.140552	5.79447	6.85e-09	1.05e-07	1641	1298	1481	995	769	921
ARL8B	448.977	0.0954101	0.14513	0.657413	0.510915	0.706381	457	434	456	467	355	552
ARL9	16.5378	-1.74421	0.498111	-3.50164	0.000462399	0.00281309	9	1	7	17	35	31
ARMC1	246.591	-0.0318836	0.178959	-0.178162	0.858596	0.931702	225	258	223	274	195	323
ARMC10	290.636	-0.0960617	0.160427	-0.598789	0.549314	0.735072	278	250	288	321	248	382
ARMC12	62.4833	0.759737	0.296977	2.55824	0.0105203	0.0400662	90	51	92	59	30	56
ARMC2	26.2635	0.33402	0.371344	0.899491	0.368391	0.577148	24	31	31	24	17	32
ARMC3	1.15671	0.16952	0.545234	0.310913	0.755867	NA	0	3	1	2	0	1
ARMC4	9.79196	-0.686311	0.51077	-1.34368	0.179052	0.35753	8	5	7	11	12	17
ARMC5	527.232	0.40729	0.15671	2.59901	0.00934933	0.0364152	612	485	656	520	406	489
ARMC6	639.782	0.347148	0.152061	2.28295	0.0224335	0.0739558	780	601	705	638	520	596
ARMC7	279.604	0.048256	0.207372	0.232703	0.815992	0.90667	361	214	253	328	257	270
ARMC8	296.933	-0.270401	0.166688	-1.6222	0.104761	0.240805	252	255	273	335	259	440
ARMC9	299.42	-0.0250197	0.164759	-0.151856	0.8793	0.942981	272	285	303	313	288	342
ARMCX1	504.609	-0.0926281	0.152482	-0.60747	0.543539	0.731311	430	501	483	551	429	670
ARMCX2	799.298	-0.292685	0.161574	-1.81146	0.0700692	0.178018	563	702	814	887	787	1100
ARMCX3	670.088	-0.339065	0.158048	-2.14532	0.0319272	0.0975038	522	578	611	680	716	954
ARMCX4	313.178	-0.314722	0.16273	-1.93402	0.0531112	0.144264	275	263	270	335	311	450
ARMCX5	89.477	0.593113	0.241991	2.45097	0.0142473	0.0511992	97	101	116	64	72	84
ARMCX5-GPRASP2	4.87054	-0.157784	0.585756	-0.269367	0.787647	0.890112	4	4	5	4	4	9
ARMCX6	412.106	-0.452224	0.157158	-2.87751	0.00400831	0.0179303	373	308	326	493	457	539
ARMS2	1.16633	-0.356184	0.56115	-0.63474	0.525598	NA	1	1	0	1	2	2
ARMT1	211.76	-0.383829	0.175588	-2.18596	0.0288188	0.0897278	185	173	173	262	218	273
ARNT	422.218	-0.12852	0.159766	-0.804427	0.421151	0.627871	360	401	408	495	335	575
ARNT2	550.75	0.596703	0.182133	3.2762	0.00105216	0.00575091	507	730	688	507	322	560
ARNTL	38.4206	-0.156365	0.321763	-0.485963	0.626993	0.791944	29	36	40	45	32	52
ARNTL2	19.4566	-0.936501	0.422545	-2.21634	0.0266685	0.0846926	13	13	10	21	26	36
ARNTL2-AS1	0.892567	0.0860213	0.474761	0.181188	0.85622	NA	3	0	0	0	2	0
ARPC1A	1138.38	-0.0797378	0.125239	-0.636684	0.524331	0.716366	1129	1006	1078	1315	979	1398
ARPC1B	531.679	0.547059	0.16174	3.38233	0.000718728	0.00412702	599	566	673	519	395	427
ARPC2	2114.77	0.239764	0.130423	1.83836	0.06601	0.170055	2443	2019	2196	2169	1771	2116
ARPC3	1020.06	0.582425	0.137376	4.23963	2.24e-05	0.00019133	1296	1133	1127	888	757	899
ARPC4	1648.39	0.58368	0.18218	3.20386	0.00135597	0.00711908	2508	1554	1716	1628	1168	1299
ARPC4-TTLL3	0.46951	-0.318582	0.403103	-0.790323	0.429339	NA	0	0	0	0	1	2
ARPC5	1631.01	0.325674	0.169245	1.92428	0.05432	0.14681	1586	1934	1740	1658	971	2015
ARPC5L	555.5	0.0929659	0.177591	0.523484	0.600637	0.772358	677	483	507	588	539	536
ARPIN	294.146	0.111157	0.164509	0.675691	0.499237	0.696487	280	292	315	285	239	370
ARPP19	1089.71	-0.0932099	0.147095	-0.633672	0.526295	0.717949	932	1079	1042	1221	862	1503
ARPP21	20.6667	-0.611214	0.427378	-1.43015	0.152674	0.319032	22	8	16	26	17	40
ARR3	10.7619	-0.175279	0.496399	-0.353102	0.724012	0.85456	8	8	13	11	9	17
ARRB1	580.514	0.411008	0.149945	2.74106	0.0061242	0.0255661	695	566	668	536	476	537
ARRB2	259.73	0.938078	0.181118	5.17938	2.23e-07	2.8e-06	322	344	327	210	163	177
ARRDC1	639.934	0.109365	0.150951	0.724506	0.468755	0.670912	715	532	687	699	549	680
ARRDC1-AS1	479.982	0.114187	0.157537	0.724825	0.468559	0.670741	569	417	466	530	386	536
ARRDC2	10.5749	-0.695918	0.530308	-1.31229	0.189422	0.370921	5	9	7	5	14	25
ARRDC3	425.273	0.133048	0.173009	0.76902	0.441881	0.647412	430	406	458	390	306	602
ARRDC3-AS1	7.74574	-1.2495	0.557305	-2.24204	0.024959	0.0805108	1	5	4	16	9	13
ARRDC4	315.687	-0.18073	0.178393	-1.0131	0.311012	0.517821	278	322	254	321	312	421
ARRDC5	0.861965	-0.120239	0.495508	-0.242657	0.808271	NA	2	0	0	0	2	1
ARSA	1560.09	0.532236	0.141551	3.76004	0.000169888	0.00116006	1805	1530	2044	1528	1026	1462
ARSB	416.929	-0.336875	0.15154	-2.22301	0.0262149	0.0836393	341	366	359	517	377	582
ARSD	1302.9	0.0910614	0.140434	0.648429	0.516708	0.711016	1347	1227	1331	1415	929	1684
ARSE	185.927	1.26758	0.203993	6.21386	5.17e-10	9.14e-09	261	242	267	124	69	151
ARSF	3.08605	-0.527836	0.610059	-0.865221	0.386918	0.59504	2	1	3	3	4	6
ARSG	24.4206	-0.860808	0.383121	-2.24683	0.0246511	0.0797482	16	13	19	36	30	35
ARSH	0.335579	0.169984	0.33866	0.50193	0.615717	NA	0	0	2	0	0	0
ARSI	99.095	0.586986	0.244337	2.40236	0.0162895	0.0569766	131	86	133	93	56	101
ARSJ	29.5398	-1.21261	0.399823	-3.03287	0.0024224	0.0117146	14	12	22	37	25	78
ARSK	102.121	-0.888651	0.223246	-3.98058	6.87e-05	0.000525391	72	65	68	139	114	169
ART3	23.8521	-4.49993	0.546629	-8.23215	1.84e-16	5.94e-15	0	0	0	49	35	69
ART4	1.49093	0.625043	0.573238	1.09037	0.275549	NA	1	3	3	0	0	2
ART5	65.9379	0.205476	0.277466	0.740545	0.458969	0.662329	71	51	85	57	50	87
ARTN	116.295	-3.18311	0.298502	-10.6636	1.51e-26	1.05e-24	15	20	23	194	256	195
ARV1	142.171	0.0149931	0.218461	0.0686303	0.945284	0.974742	174	117	125	173	109	166
ARVCF	766.655	0.512695	0.151839	3.37656	0.000733974	0.00420373	1016	751	860	691	591	683
AS3MT	2.53856	-0.0967701	0.606099	-0.159661	0.873148	0.93924	1	0	6	4	1	4
ASAH1	853.161	-0.907201	0.15403	-5.88976	3.87e-09	6.12e-08	623	540	547	1047	1127	1299
ASAH2	5.26503	-0.815993	0.583774	-1.39779	0.162177	0.333151	3	3	3	11	4	9
ASAH2B	3.5346	-0.0158492	0.607357	-0.0260954	0.979181	0.991046	4	5	1	3	4	4
ASAP1	397.999	-0.603256	0.171809	-3.5112	0.000446081	0.00272367	286	308	318	467	376	695
ASAP1-IT1	0.292493	-0.166948	0.352933	-0.473031	0.636191	NA	0	0	0	1	0	1
ASAP1-IT2	3.63544	0.364077	0.60856	0.598259	0.549667	0.735157	7	4	2	6	1	2
ASAP2	208.741	-0.527907	0.213979	-2.4671	0.0136213	0.049488	161	154	179	267	156	379
ASAP3	684.045	-0.512708	0.152762	-3.35626	0.000790054	0.0044846	616	470	547	845	784	880
ASB1	447.341	-0.0561811	0.150162	-0.374136	0.708303	0.845122	422	420	429	454	432	541
ASB10	2.92573	-1.76755	0.605624	-2.91856	0.00351647	0.0160482	0	0	0	5	4	10
ASB11	0.553029	-0.343129	0.392543	-0.874118	0.382054	NA	0	0	0	0	0	4
ASB12	4.81842	-0.802053	0.595464	-1.34694	0.178	0.356181	3	1	4	4	9	8
ASB13	210.238	-1.01686	0.180875	-5.62191	1.89e-08	2.75e-07	144	125	130	300	265	319
ASB14	20.0858	-0.0469029	0.411486	-0.113984	0.90925	0.956386	18	23	16	18	17	30
ASB16	247.809	-0.296551	0.187183	-1.58429	0.113128	0.254946	228	193	223	238	274	343
ASB16-AS1	293.853	-0.247491	0.166992	-1.48205	0.138327	0.296558	292	219	269	336	291	375
ASB18	0.331253	-0.18007	0.365081	-0.493232	0.621848	NA	0	0	0	0	1	1
ASB2	594.188	-4.88593	0.538799	-9.06819	1.21e-19	5.13e-18	18	1	8	1247	984	1500
ASB3	34.6721	0.218011	0.34084	0.639628	0.522414	0.714871	48	32	29	35	28	37
ASB4	0.276515	-0.149727	0.335972	-0.445652	0.655848	NA	0	0	0	0	0	2
ASB6	829.618	0.0114454	0.163319	0.0700797	0.94413	0.973861	983	658	783	876	799	897
ASB7	127.802	-0.0485069	0.232434	-0.208691	0.83469	0.917932	121	108	137	141	83	196
ASB8	183.399	-0.208497	0.215852	-0.965923	0.334083	0.541473	124	197	169	233	168	218
ASB9	6.6146	0.359461	0.569983	0.630652	0.528268	0.719211	9	2	12	6	5	6
ASB9P1	0.822813	0.177904	0.510044	0.3488	0.727239	NA	1	2	0	1	0	1
ASCC1	347.722	-0.264328	0.159821	-1.6539	0.0981477	0.230052	279	311	324	430	333	430
ASCC2	950.58	0.165112	0.144725	1.14087	0.253925	0.451928	1017	861	1045	1050	814	932
ASCC3	191.421	-0.45393	0.195197	-2.32549	0.0200456	0.0676212	131	162	173	218	191	293
ASCL1	10.2154	-0.209374	0.505314	-0.414343	0.678623	0.827289	9	9	9	9	8	19
ASCL2	0.47733	-0.101798	0.403012	-0.252593	0.800583	NA	1	0	0	2	0	0
ASCL4	0.347231	-0.185107	0.369583	-0.500854	0.616474	NA	0	0	0	1	1	0
ASCL5	0.903654	0.539639	0.450676	1.1974	0.231151	NA	0	5	0	0	0	0
ASF1A	238.201	0.265169	0.174991	1.51533	0.12969	0.282316	260	253	242	207	197	275
ASF1B	81.376	-1.41653	0.3112	-4.55182	5.32e-06	5.17e-05	42	45	34	106	159	97
ASGR1	219.41	0.287193	0.200719	1.43082	0.152482	0.318818	247	205	250	233	197	179
ASGR2	7.65295	1.95607	0.577935	3.38459	0.000712858	0.00409727	14	9	17	4	1	0
ASH1L	416.117	-0.38354	0.155672	-2.46377	0.0137484	0.0497974	320	373	350	495	405	589
ASH1L-AS1	118.6	-0.74332	0.217612	-3.41581	0.000635934	0.00372408	83	85	86	164	144	157
ASH2L	1586.8	0.404706	0.14436	2.80345	0.00505596	0.0218231	1729	1785	1735	1718	1043	1554
ASIC1	398.722	0.130569	0.203043	0.643062	0.520184	0.713469	486	334	393	399	421	344
ASIC2	12.5383	-1.89099	0.561891	-3.36541	0.000764302	0.00435645	1	5	3	16	39	7
ASIC3	253.436	0.329619	0.177248	1.85966	0.0629342	0.16417	285	249	287	255	214	228
ASIC4	207.065	-1.38431	0.274676	-5.03979	4.66e-07	5.57e-06	152	75	94	293	379	244
ASIP	32.0876	0.593477	0.344746	1.72149	0.0851621	0.207119	43	34	37	32	19	28
ASL	274.157	0.128767	0.191023	0.67409	0.500254	0.697372	336	202	298	279	239	302
ASNA1	1102.99	0.120226	0.170322	0.705873	0.480267	0.679303	1293	959	1091	1278	1011	984
ASNS	281.05	-0.273441	0.175216	-1.56059	0.118619	0.263788	278	222	238	381	243	350
ASNSD1	341.08	-0.0712132	0.163755	-0.434878	0.663651	0.818062	325	333	306	404	267	440
ASPA	0.307116	0.00993314	0.357588	0.0277782	0.977839	NA	1	0	0	0	0	1
ASPDH	40.9459	0.230344	0.318128	0.724059	0.46903	0.671025	42	39	48	31	38	48
ASPG	1180.32	0.279479	0.160882	1.73717	0.082358	0.201904	1172	1214	1374	1106	1115	1061
ASPH	760.548	-0.794834	0.161416	-4.92413	8.47e-07	9.66e-06	503	590	506	919	811	1344
ASPHD1	528.936	1.92729	0.186994	10.3067	6.57e-25	4.16e-23	968	666	822	292	158	229
ASPHD2	30.6233	-0.342399	0.373687	-0.916273	0.359524	0.569004	14	28	35	35	31	43
ASPM	63.7881	-0.943379	0.280095	-3.36806	0.000756983	0.00432044	37	43	43	74	89	101
ASPN	3.62007	0.61655	0.610924	1.00921	0.312875	0.519903	0	5	10	1	1	5
ASPRV1	73.7433	-0.186032	0.271178	-0.686016	0.492703	0.690512	72	49	79	92	78	74
ASPSCR1	983.677	0.610659	0.154961	3.94074	8.12e-05	0.000610258	1287	951	1232	935	686	804
ASRGL1	106.924	-0.600233	0.249103	-2.40958	0.0159707	0.0560704	75	81	87	146	140	112
ASS1	960.771	1.68935	0.191574	8.81823	1.16e-18	4.55e-17	1851	1193	1254	595	357	445
ASTE1	119.94	0.339711	0.226042	1.50287	0.132873	0.287352	152	123	115	129	95	105
ASTL	2.05082	0.340006	0.59121	0.575101	0.565223	0.746842	4	1	3	0	0	5
ASTN1	115.225	-0.931741	0.251376	-3.70656	0.000210095	0.00140276	70	74	82	208	90	194
ASTN2	57.846	-0.361273	0.281778	-1.28212	0.199801	0.384075	46	40	60	62	63	80
ASUN	183.714	-0.0626958	0.194131	-0.322956	0.746729	0.868666	208	141	174	212	156	225
ASXL1	1111.55	0.00840688	0.141423	0.0594451	0.952598	0.978606	1012	1021	1205	1199	859	1470
ASXL2	68.2172	-0.891146	0.324671	-2.74476	0.00605546	0.0253712	32	67	34	91	58	143
ASXL3	92.362	-0.471972	0.263012	-1.79449	0.0727349	0.183069	87	72	64	120	66	164
ASZ1	0.671614	0.315413	0.485497	0.64967	0.515905	NA	1	1	1	1	0	0
ATAD1	545.908	-0.669675	0.169132	-3.95948	7.51e-05	0.000568598	384	422	409	758	467	934
ATAD2	153.435	-1.57742	0.213525	-7.38753	1.5e-13	3.75e-12	67	76	74	214	230	279
ATAD2B	139.951	-0.389134	0.203426	-1.9129	0.0557604	0.149953	106	120	124	171	128	206
ATAD3A	1091.33	-0.0264492	0.151945	-0.17407	0.86181	0.932895	1174	856	1117	1223	1045	1162
ATAD3B	999.81	0.38797	0.15169	2.55764	0.0105384	0.0401264	1189	912	1206	952	648	1157
ATAD3C	20.6634	1.24069	0.42798	2.89895	0.00374415	0.0169141	35	25	28	6	11	18
ATAD5	62.625	-0.430794	0.273382	-1.5758	0.115073	0.258284	48	49	56	66	75	84
ATAT1	514.043	0.299227	0.151929	1.96952	0.0488932	0.135637	535	504	612	546	356	557
ATCAY	7.39829	-0.0415695	0.546724	-0.0760338	0.939392	0.972051	9	5	7	8	9	6
ATE1	244.259	-0.522139	0.178606	-2.92341	0.00346218	0.0158288	198	184	198	299	221	402
ATE1-AS1	4.94126	-0.176719	0.582472	-0.303394	0.76159	0.876287	4	4	5	5	5	7
ATF1	156.358	0.184557	0.205947	0.896134	0.370181	0.579088	144	185	153	161	116	186
ATF2	380.16	0.164359	0.161086	1.02031	0.307579	0.514556	368	401	397	360	292	485
ATF3	263.902	0.6347	0.548478	1.1572	0.247189	0.443669	212	356	423	126	57	451
ATF4	4164.92	0.286108	0.162486	1.76081	0.0782698	0.194231	5454	3809	4067	4004	3760	3833
ATF5	402.105	0.0960708	0.184036	0.522021	0.601656	0.77326	435	321	454	391	410	398
ATF6	431.112	-0.553107	0.153717	-3.59823	0.000320389	0.00202773	360	293	360	563	408	661
ATF6B	1454.83	0.487198	0.150116	3.24548	0.00117252	0.00632163	1803	1427	1718	1200	1234	1309
ATF7	357.949	0.0412248	0.163858	0.251589	0.801359	0.898036	308	371	373	367	300	447
ATF7IP	842.856	0.0238321	0.141426	0.168513	0.86618	0.934902	776	876	808	851	764	1007
ATF7IP2	285.847	-0.702567	0.163116	-4.30716	1.65e-05	0.00014557	228	186	215	379	301	442
ATG10	79.0372	-0.356136	0.261677	-1.36098	0.173521	0.34989	53	78	68	112	72	97
ATG101	488.519	0.137618	0.192672	0.714258	0.475068	0.67588	664	374	456	554	364	554
ATG12	500.465	0.143002	0.145098	0.985553	0.324352	0.531156	497	514	513	546	387	569
ATG13	1087.94	0.131148	0.134712	0.973541	0.330284	0.538104	1206	1015	1083	1091	977	1174
ATG14	332.78	0.105452	0.164414	0.641381	0.521275	0.714047	299	352	349	334	269	410
ATG16L1	271.988	-0.286283	0.170855	-1.67559	0.0938181	0.222358	233	254	221	345	249	350
ATG16L2	238.404	-0.532149	0.193818	-2.74562	0.00603972	0.0253157	225	144	196	277	236	385
ATG2A	1165.89	0.310699	0.148806	2.08795	0.0368021	0.108922	1199	1132	1425	1058	1038	1130
ATG2B	366.937	-0.0244093	0.170217	-0.143401	0.885973	0.945818	317	346	393	362	300	515
ATG3	431.608	-0.14417	0.169123	-0.852455	0.393962	0.601971	451	390	346	507	431	474
ATG4A	182.68	-0.0678694	0.184689	-0.367479	0.713262	0.847779	173	165	179	211	171	203
ATG4B	1405.5	0.188432	0.135398	1.39169	0.164015	0.335674	1547	1278	1530	1418	1243	1432
ATG4C	74.0869	-0.190958	0.248174	-0.769453	0.441625	0.647143	68	68	64	91	65	94
ATG4D	764.95	-0.183115	0.184474	-0.992631	0.32089	0.527619	848	518	719	935	799	789
ATG5	225.453	0.0988335	0.176633	0.559541	0.575793	0.75476	230	236	210	223	186	278
ATG7	1023.97	0.697377	0.13268	5.2561	1.47e-07	1.89e-06	1356	1093	1241	874	670	905
ATG9A	1129.14	-0.197376	0.151279	-1.30472	0.191989	0.374099	1159	888	1007	1224	1210	1314
ATG9B	170.801	0.018305	0.214087	0.0855026	0.931862	0.968374	150	147	202	180	177	167
ATHL1	2163.48	0.163707	0.133297	1.22814	0.219396	0.40926	2279	1918	2456	2155	1927	2283
ATIC	692.423	0.17231	0.132435	1.30109	0.193229	0.375775	734	681	716	722	546	785
ATL1	60.8071	0.721471	0.286767	2.51588	0.0118736	0.0442639	61	83	78	44	33	67
ATL2	467.097	0.22438	0.15608	1.4376	0.150547	0.315623	490	492	480	478	321	573
ATL3	278.582	0.301757	0.169888	1.77621	0.0756984	0.188999	327	273	296	262	195	335
ATM	336.042	-0.307975	0.191396	-1.6091	0.107595	0.245863	264	313	290	321	313	552
ATMIN	673.874	0.0703155	0.151535	0.464021	0.642633	0.802859	637	676	690	708	493	897
ATN1	7611.17	0.551147	0.131965	4.17646	2.96e-05	0.000247918	8966	7565	9838	6922	5655	6656
ATOH1	0.824781	0.146025	0.492058	0.296764	0.766647	NA	0	1	2	2	0	0
ATOH7	20.0274	1.03592	0.417099	2.48363	0.0130052	0.0476721	22	24	35	12	12	14
ATOH8	122.028	-1.11071	0.274938	-4.03986	5.35e-05	0.000419838	107	54	57	198	175	147
ATOX1	613.677	0.369071	0.187773	1.96552	0.0493545	0.136619	889	527	604	621	488	557
ATP10A	1.45027	-0.0322102	0.567519	-0.0567562	0.954739	NA	1	3	0	3	0	2
ATP10B	0.500111	-0.118918	0.431	-0.275912	0.782616	NA	1	0	0	0	1	1
ATP10D	195.95	0.818329	0.205781	3.9767	6.99e-05	0.000533518	246	230	256	158	89	205
ATP11A	934.805	0.167472	0.168968	0.991148	0.321613	0.528466	886	950	1037	866	636	1325
ATP11A-AS1	1.58382	0.358168	0.581241	0.616212	0.537755	NA	1	4	1	0	2	1
ATP11AUN	0.306047	0.00990987	0.357212	0.0277422	0.977868	NA	0	0	1	0	0	1
ATP11B	482.191	0.214542	0.177858	1.20626	0.227719	0.419865	555	452	502	484	300	651
ATP11C	366.388	-0.146784	0.170965	-0.858562	0.390582	0.598714	346	325	338	386	290	557
ATP12A	1.20401	0.573482	0.536183	1.06956	0.284816	NA	4	0	2	0	1	0
ATP13A1	2007.75	0.509925	0.13854	3.6807	0.000232595	0.00153554	2094	2073	2703	1865	1363	1991
ATP13A2	1695.8	0.263348	0.151499	1.73828	0.0821615	0.201506	1907	1427	2064	1859	1284	1700
ATP13A3	530.311	-0.867576	0.19381	-4.47643	7.59e-06	7.15e-05	370	351	358	622	489	1114
ATP13A4	1.31066	0.28626	0.559819	0.511344	0.60911	NA	2	3	0	1	0	2
ATP13A5	8.37878	-0.756611	0.532335	-1.42131	0.155227	0.322893	6	6	4	14	10	11
ATP13A5-AS1	3.36747	-1.14888	0.611135	-1.87992	0.0601195	0.158544	2	1	0	2	6	10
ATP1A1	8615.57	-0.674397	0.11573	-5.82731	5.63e-09	8.78e-08	6639	5951	6637	10811	9120	13582
ATP1A1-AS1	2671.16	-0.538595	0.133712	-4.02802	5.62e-05	0.000438658	2283	1837	2197	3046	2822	4127
ATP1A2	101.41	-4.84	0.368408	-13.1376	2.01e-39	2.98e-37	6	4	3	170	186	268
ATP1A3	210.306	-0.139805	0.221623	-0.630825	0.528155	0.719167	217	152	212	255	234	189
ATP1A4	3.45008	-0.135915	0.611048	-0.22243	0.823979	0.911868	1	6	2	4	0	9
ATP1B1	1603.15	-0.409945	0.167798	-2.44308	0.0145625	0.0520486	1118	1376	1484	1848	1358	2673
ATP1B2	1254.03	-2.579	0.160286	-16.09	3e-58	8.77e-56	413	262	344	2152	2021	2584
ATP1B3	934.213	-0.480662	0.141101	-3.40651	0.000657997	0.00383384	823	672	765	1121	1052	1226
ATP1B4	0.662505	-0.485671	0.442292	-1.09808	0.272171	NA	0	0	0	0	2	2
ATP2A1	173.513	-0.251744	0.209716	-1.2004	0.229983	0.422772	180	115	165	176	185	230
ATP2A1-AS1	44.5429	-0.972028	0.317809	-3.05853	0.00222426	0.0108714	33	27	24	70	59	57
ATP2A2	3280.59	-1.45667	0.129024	-11.2899	1.47e-29	1.27e-27	1561	1624	1857	4800	4277	6120
ATP2A3	22.2405	-1.91888	0.495739	-3.87076	0.000108498	0.000783832	14	5	1	21	52	40
ATP2B1	1343.27	0.305986	0.156157	1.95948	0.050057	0.137986	1457	1380	1482	1265	845	1743
ATP2B2	25.2486	-2.77542	0.447389	-6.20359	5.52e-10	9.74e-09	5	7	1	53	43	47
ATP2B3	5.03778	0.284161	0.589888	0.48172	0.630005	0.794354	8	2	7	5	5	3
ATP2B4	1772.24	-0.542725	0.122636	-4.42551	9.62e-06	8.87e-05	1379	1326	1473	2148	1912	2548
ATP2C1	795.862	-0.0564837	0.146157	-0.386459	0.699157	0.839934	695	755	813	887	625	1072
ATP2C2	20.7334	0.52735	0.418566	1.2599	0.207707	0.393589	16	32	24	15	17	19
ATP4A	0.87991	0.636842	0.478339	1.33136	0.18307	NA	2	3	0	0	0	0
ATP4B	0.331253	-0.18007	0.365081	-0.493232	0.621848	NA	0	0	0	0	1	1
ATP5A1	7068.81	-0.851338	0.112928	-7.53876	4.74e-14	1.25e-12	4940	4713	4926	10144	7992	10483
ATP5B	7739.97	-0.904675	0.126721	-7.13911	9.39e-13	2.17e-11	5749	4777	5057	11157	9350	11081
ATP5C1	1872.49	-0.115859	0.141884	-0.816576	0.414171	0.621032	2029	1582	1606	2137	1807	2142
ATP5D	1727.01	-0.136217	0.168525	-0.808291	0.418923	0.625701	1825	1211	1757	2262	1575	1825
ATP5E	8.7167	0.204149	0.560737	0.364072	0.715804	0.849166	20	4	4	5	10	9
ATP5EP2	0.759717	-0.251504	0.454366	-0.553528	0.579902	NA	0	1	0	0	3	0
ATP5F1	1443.49	-0.236689	0.135957	-1.7409	0.0817008	0.20068	1403	1233	1204	1663	1480	1733
ATP5G1	1004.39	-0.913313	0.201143	-4.54062	5.61e-06	5.43e-05	846	530	628	1393	1461	1183
ATP5G2	2952.33	0.223116	0.170279	1.3103	0.190094	0.371625	3922	2380	2979	3274	2412	2818
ATP5G3	2545.59	-0.681959	0.182565	-3.73543	0.000187394	0.00126694	2341	1709	1588	3351	3335	2998
ATP5H	1343.77	-0.490627	0.202298	-2.42528	0.0152968	0.0542274	1385	956	886	1734	1706	1387
ATP5I	1071.19	-0.225569	0.215851	-1.04502	0.296012	0.501508	1234	923	698	1461	1132	977
ATP5J	1490.62	-0.223056	0.201965	-1.10443	0.269408	0.470623	1790	1071	1133	1629	1758	1549
ATP5J2	1521.99	0.00968723	0.215416	0.0449699	0.964131	0.983937	1944	1221	1278	1604	1742	1266
ATP5L	1929.22	0.0945473	0.190937	0.495175	0.620477	0.78707	2646	1467	1698	2063	1817	1906
ATP5L2	0.721888	-0.263049	0.451717	-0.582331	0.560344	NA	1	0	0	0	0	4
ATP5O	1960.88	-0.246743	0.177747	-1.38817	0.165086	0.33738	2179	1513	1510	2344	2173	2063
ATP5S	81.9134	0.0296633	0.244171	0.121485	0.903307	0.953677	90	71	80	84	63	111
ATP5SL	720.631	-0.0288103	0.160305	-0.179722	0.857371	0.931141	788	604	681	865	674	728
ATP6AP1	2322.6	0.0357253	0.146525	0.243816	0.807373	0.901627	2556	1934	2351	2436	2267	2414
ATP6AP1L	37.0971	0.0907163	0.335617	0.270297	0.786932	0.889864	35	31	46	34	26	55
ATP6AP2	2082.17	0.121967	0.12224	0.997772	0.31839	0.525317	2067	2024	2210	2088	1653	2571
ATP6V0A1	811.619	0.160194	0.14826	1.08049	0.279923	0.48306	956	686	854	808	632	986
ATP6V0A2	290.318	-0.0790376	0.181448	-0.435594	0.663131	0.817665	298	232	292	328	213	415
ATP6V0A4	4.47643	0.540678	0.605709	0.892635	0.372052	0.580234	3	6	8	5	4	0
ATP6V0B	1377.9	-0.00902629	0.156837	-0.0575519	0.954106	0.979143	1647	1101	1249	1592	1214	1529
ATP6V0C	3770.61	0.364411	0.16576	2.19843	0.0279186	0.0877535	4952	3067	4387	4080	2699	3572
ATP6V0D1	1409.26	0.177324	0.158239	1.1206	0.262457	0.462496	1724	1142	1496	1581	1145	1417
ATP6V0D2	4.23241	0.509554	0.603234	0.844704	0.398276	0.60639	10	2	4	3	4	2
ATP6V0E1	873.629	0.219932	0.155119	1.41782	0.156243	0.32455	1042	826	865	899	780	825
ATP6V0E2	168.239	-0.785196	0.204437	-3.84077	0.00012265	0.000873241	137	90	129	228	202	239
ATP6V0E2-AS1	28.3208	-0.595025	0.380021	-1.56577	0.117402	0.261802	19	13	32	34	30	46
ATP6V1A	406.578	0.0563481	0.15081	0.373636	0.708675	0.845207	406	398	399	418	326	519
ATP6V1B1	12.229	1.63608	0.510677	3.20374	0.00135655	0.00711908	28	12	18	3	6	5
ATP6V1B2	588.996	-0.102243	0.148976	-0.686303	0.492522	0.690468	612	456	585	645	513	771
ATP6V1C1	312.176	-0.00928307	0.165651	-0.05604	0.95531	0.979868	312	311	279	332	251	411
ATP6V1C2	2316.25	0.257125	0.144272	1.78223	0.0747121	0.187016	2927	2056	2364	2439	1783	2412
ATP6V1D	455.083	-0.0366741	0.146794	-0.249833	0.802717	0.898936	419	428	456	529	391	531
ATP6V1E1	788.427	0.188861	0.167598	1.12687	0.259797	0.45917	1013	740	689	846	657	801
ATP6V1E2	12.0413	0.534196	0.482795	1.10646	0.268526	0.469913	15	14	14	13	5	12
ATP6V1F	1439.91	0.186347	0.204046	0.913258	0.361107	0.570648	1945	1164	1363	1524	1433	1163
ATP6V1G1	1376.82	0.441875	0.130739	3.37984	0.000725293	0.00416276	1694	1483	1431	1282	1023	1356
ATP6V1G2	50.5508	-0.933378	0.301967	-3.09099	0.0019949	0.00992719	41	25	32	65	67	78
ATP6V1H	444.476	-0.302637	0.145096	-2.08577	0.0369998	0.109358	407	370	376	546	421	581
ATP7A	135.504	0.226205	0.216379	1.04541	0.295834	0.501301	120	145	160	123	100	173
ATP7B	2235.49	2.8527	0.389884	7.31678	2.54e-13	6.25e-12	2896	4236	4560	603	192	620
ATP8A1	76.2859	0.851907	0.261735	3.25485	0.00113452	0.0061446	112	86	91	56	37	78
ATP8A2	16.354	-1.30773	0.45214	-2.89232	0.0038241	0.0172142	9	5	10	27	24	25
ATP8B1	12.3123	-0.381131	0.491879	-0.774847	0.43843	0.643841	8	11	11	12	8	27
ATP8B2	1137.11	-0.455158	0.149368	-3.04723	0.00230964	0.011221	837	978	955	1243	1160	1759
ATP8B3	39.0501	-0.881905	0.378461	-2.33024	0.0197935	0.0668721	24	32	19	41	72	42
ATP8B4	7.75891	0.843525	0.556076	1.51692	0.129286	0.281722	9	11	11	2	8	4
ATP8B5P	1.86619	-0.304568	0.600887	-0.506865	0.61225	NA	2	1	1	3	3	1
ATP9A	798.083	0.696872	0.174352	3.99693	6.42e-05	0.000495218	945	963	967	717	384	850
ATP9B	299.908	0.45763	0.162697	2.81277	0.00491174	0.0213089	342	316	352	297	217	277
ATPAF1	361.537	-0.63961	0.157162	-4.06975	4.71e-05	0.000375569	266	283	266	501	385	501
ATPAF2	220.245	0.205345	0.191785	1.0707	0.284303	0.488351	244	190	253	237	195	203
ATPIF1	1218.44	0.0185239	0.157535	0.117586	0.906396	0.955169	1377	1109	1073	1338	1186	1231
ATR	135.243	0.134269	0.215341	0.62352	0.532943	0.722838	141	135	136	137	90	186
ATRAID	993.946	0.272484	0.147507	1.84726	0.0647092	0.167672	1242	929	994	1044	775	1005
ATRIP	136.113	-0.18222	0.20948	-0.869868	0.384373	0.592091	146	102	122	150	135	169
ATRN	773.047	-0.192721	0.148647	-1.2965	0.194804	0.377891	635	722	732	868	650	1108
ATRNL1	143.746	0.530642	0.217201	2.44309	0.014562	0.0520486	136	178	181	135	85	152
ATRX	527.707	0.0371439	0.151362	0.245399	0.806148	0.901137	469	540	540	533	440	674
ATXN1	350.513	-0.619867	0.177276	-3.49661	0.000471206	0.00286044	241	272	283	377	415	542
ATXN10	1284.47	-0.074986	0.122545	-0.611904	0.540601	0.72888	1230	1160	1240	1482	1113	1560
ATXN1L	573.224	-0.273711	0.15676	-1.74605	0.0808026	0.198967	429	541	530	665	525	797
ATXN2	376.398	-0.186473	0.162475	-1.1477	0.25109	0.448672	339	319	364	480	296	501
ATXN2L	2858.57	0.0796601	0.132953	0.599161	0.549065	0.734956	2713	2565	3262	2953	2597	3131
ATXN3	163.956	0.076869	0.217719	0.353064	0.72404	0.85456	150	188	149	139	139	227
ATXN7	161.691	-0.185497	0.225097	-0.824076	0.409896	0.617493	115	179	142	177	132	241
ATXN7L1	61.5205	-0.246417	0.275806	-0.893444	0.37162	0.580004	52	51	60	69	48	98
ATXN7L2	288.283	-0.659654	0.179674	-3.6714	0.000241228	0.00158115	241	173	232	366	348	389
ATXN7L3	2131.61	0.352746	0.145895	2.41781	0.0156143	0.0550996	2613	2055	2291	1931	1873	1991
ATXN7L3B	1784.42	-0.134922	0.128735	-1.04806	0.29461	0.499969	1540	1733	1650	2047	1607	2231
AUH	189.811	-0.573012	0.180613	-3.1726	0.0015108	0.00781924	157	135	149	251	189	280
AUNIP	215.127	-0.781421	0.185316	-4.21669	2.48e-05	0.000210055	162	129	165	273	267	312
AUP1	1558.35	0.248056	0.145053	1.7101	0.0872473	0.210534	1956	1370	1603	1591	1256	1618
AURKA	242.322	-1.15973	0.216213	-5.36383	8.15e-08	1.09e-06	174	137	115	365	357	316
AURKAIP1	1309.01	-0.0153414	0.175808	-0.087262	0.930463	0.967571	1572	1014	1204	1490	1301	1283
AURKAPS1	2.95427	-0.810433	0.611089	-1.32621	0.18477	0.364774	0	2	2	3	5	6
AURKB	104.372	-0.763926	0.279309	-2.73505	0.00623702	0.0259779	52	66	102	138	150	118
AURKC	116.341	0.222745	0.235554	0.94562	0.344343	0.552827	144	99	122	97	116	118
AUTS2	639.156	-0.0366043	0.178183	-0.205431	0.837235	0.919442	498	649	681	699	465	911
AVEN	208.256	-0.141545	0.179296	-0.789452	0.429848	0.636117	180	186	208	217	194	278
AVIL	103.962	-0.326488	0.22661	-1.44075	0.149656	0.314087	101	89	76	125	105	134
AVL9	367.261	0.00482473	0.181272	0.026616	0.978766	0.991046	341	383	342	393	257	527
AVP	1.63201	0.0502204	0.596948	0.0841286	0.932954	NA	2	1	2	2	1	2
AVPI1	56.2271	-0.0660509	0.287804	-0.2295	0.81848	0.90833	60	46	53	52	63	63
AVPR1A	1.32321	-0.190644	0.570437	-0.334207	0.738223	NA	0	2	1	3	1	1
AVPR1B	0.733222	-0.519999	0.45004	-1.15545	0.247906	NA	0	0	0	1	3	0
AVPR2	13.8588	0.634284	0.483743	1.3112	0.18979	0.371272	16	15	20	4	11	17
AWAT1	0.361854	0.0110667	0.375186	0.0294967	0.976468	NA	1	0	0	0	1	0
AWAT2	0.360785	0.0110456	0.37487	0.0294652	0.976494	NA	0	0	1	0	1	0
AXDND1	5.91615	0.741058	0.582205	1.27285	0.203073	0.388226	11	4	9	7	1	4
AXIN1	673.928	0.347098	0.144329	2.40492	0.0161761	0.0566466	778	620	801	678	506	679
AXIN2	379.758	0.366095	0.206056	1.77667	0.0756219	0.188844	285	461	496	363	258	429
AXL	2501.41	0.339541	0.123118	2.75785	0.00581821	0.0245314	2891	2450	2788	2554	1814	2594
AZGP1	1.11941	-0.065275	0.542715	-0.120275	0.904265	NA	2	1	0	3	0	1
AZI2	247.484	0.165378	0.177328	0.932613	0.35102	0.559972	270	264	225	238	196	303
AZIN1	684.099	-0.228865	0.16898	-1.35439	0.175612	0.352872	575	671	574	760	546	1062
AZIN1-AS1	39.6183	0.094796	0.339958	0.278846	0.780363	0.886335	51	30	39	52	22	49
AZIN2	141.552	0.179241	0.211771	0.846389	0.397336	0.605703	167	128	142	133	136	142
AZU1	83.9661	0.900828	0.250115	3.60166	0.000316198	0.00200476	131	90	100	60	54	66
B2M	2858.87	0.410235	0.136216	3.01165	0.00259834	0.0124373	3697	2926	2865	2548	2173	2985
B3GALNT1	447.309	0.0621242	0.153919	0.403617	0.686495	0.831721	447	433	447	473	334	587
B3GALNT2	318.563	-0.265341	0.164401	-1.61398	0.106532	0.243933	307	262	270	358	282	466
B3GALT1	4.3261	-1.96025	0.610129	-3.21285	0.00131427	0.00693491	1	0	0	6	6	15
B3GALT2	11.8226	0.272522	0.493448	0.552281	0.580756	0.758645	8	19	11	12	8	13
B3GALT4	87.2294	0.312241	0.248363	1.2572	0.208683	0.394873	105	75	102	76	81	83
B3GALT5	12.4547	-0.176466	0.494247	-0.35704	0.721062	0.853077	9	16	8	8	14	20
B3GALT5-AS1	51.319	-0.0634871	0.300242	-0.211453	0.832534	0.916646	37	49	59	55	53	55
B3GALT6	1062.16	0.249201	0.139354	1.78826	0.0737347	0.185089	1186	986	1186	1173	786	1100
B3GAT1	39.7442	-0.172674	0.313234	-0.551263	0.581454	0.759056	38	35	35	43	35	56
B3GAT2	74.1984	0.103753	0.294644	0.352132	0.72474	0.854989	107	44	74	74	71	77
B3GAT3	1097.47	0.175891	0.166952	1.05354	0.292092	0.497323	1393	879	1124	1228	903	1093
B3GLCT	148.628	-0.3932	0.207093	-1.89866	0.0576092	0.153513	149	103	120	166	153	214
B3GNT2	307.345	-0.131559	0.206709	-0.636448	0.524484	0.716469	309	288	253	318	213	510
B3GNT4	3.18207	0.287255	0.610573	0.470468	0.63802	0.800105	2	3	6	5	2	1
B3GNT5	95.2758	0.926237	0.251558	3.682	0.000231407	0.00152914	111	142	112	64	47	95
B3GNT6	0.721569	-0.0198766	0.450139	-0.0441566	0.96478	NA	0	0	2	0	2	0
B3GNT7	198.354	-0.476223	0.195965	-2.43015	0.0150926	0.0536314	195	148	136	265	203	259
B3GNT8	108.131	-0.543592	0.234674	-2.31638	0.0205378	0.0688259	100	75	78	152	123	126
B3GNT9	412.906	-0.278703	0.168853	-1.65056	0.0988277	0.231174	377	310	395	477	458	470
B3GNTL1	91.4493	0.623904	0.241591	2.58248	0.00980939	0.0378517	134	90	101	78	62	84
B4GALNT1	12.6049	0.0137577	0.521639	0.026374	0.978959	0.991046	17	6	14	21	13	4
B4GALNT2	0.276515	-0.149727	0.335972	-0.445652	0.655848	NA	0	0	0	0	0	2
B4GALNT3	311.229	-2.02602	0.194455	-10.419	2.03e-25	1.33e-23	136	100	110	435	466	685
B4GALNT4	4975.43	1.36599	0.146636	9.31549	1.21e-20	5.64e-19	6864	6218	7843	3540	2134	3029
B4GALT1	754.975	-0.0733254	0.131706	-0.556735	0.577709	0.756382	716	677	742	797	686	954
B4GALT1-AS1	62.6996	-0.314438	0.369575	-0.850808	0.394876	0.603015	17	65	77	66	75	76
B4GALT2	1819.28	0.122623	0.14712	0.833488	0.404569	0.612677	1924	1581	2014	1848	1736	1813
B4GALT3	848.721	0.14114	0.143652	0.982512	0.325848	0.53266	980	748	862	929	706	896
B4GALT4	369.341	0.144376	0.164303	0.878715	0.379556	0.587313	378	366	383	348	276	493
B4GALT4-AS1	54.136	-0.180062	0.291101	-0.618555	0.53621	0.725262	52	48	47	54	43	88
B4GALT5	758.29	-0.424674	0.153603	-2.76476	0.00569642	0.0240691	664	621	588	861	689	1226
B4GALT6	144.476	0.226754	0.217783	1.04119	0.297786	0.503271	164	134	157	138	91	198
B4GALT7	703.132	0.462411	0.148521	3.11343	0.00184924	0.00928261	864	656	857	691	490	678
B4GAT1	1226.23	0.101958	0.150715	0.6765	0.498723	0.695934	1366	1170	1149	1345	1133	1195
B9D1	307.34	0.393977	0.176688	2.22979	0.0257614	0.0826061	411	299	307	307	225	301
B9D2	127.884	0.429768	0.220439	1.9496	0.0512239	0.140399	172	131	125	131	93	116
BAALC	341.161	0.702348	0.179912	3.90384	9.47e-05	0.000699218	455	382	396	340	186	293
BAALC-AS1	3.99267	-0.0922501	0.603231	-0.152927	0.878456	0.942499	2	2	7	3	5	5
BAALC-AS2	1.86101	-0.284384	0.597748	-0.47576	0.634246	NA	0	2	2	2	3	2
BAAT	2.23134	-0.678873	0.602278	-1.12718	0.259668	0.459032	1	2	0	1	3	7
BABAM1	1058.34	0.250831	0.166058	1.5105	0.130916	0.28405	1306	970	1072	1137	928	927
BACE1	1700.97	0.563941	0.130269	4.32905	1.5e-05	0.000133213	1800	2038	2052	1492	1151	1679
BACE1-AS	164.47	0.131455	0.255955	0.513587	0.607541	0.777309	112	192	195	171	97	239
BACE2	70.8305	-1.04804	0.257551	-4.06927	4.72e-05	0.000376163	49	38	44	105	84	115
BACH1	276.52	0.0432981	0.200199	0.216275	0.828774	0.914564	265	302	246	267	195	413
BACH1-IT2	0.554457	0.136079	0.41817	0.325415	0.744867	NA	0	2	0	0	1	0
BACH2	202.799	-0.0575717	0.212707	-0.270661	0.786651	0.889781	176	208	192	231	132	305
BAD	656.981	0.174779	0.198153	0.882039	0.377756	0.586003	815	532	685	765	607	529
BAG1	799.494	-0.621764	0.1572	-3.95523	7.65e-05	0.000578068	716	545	560	1079	923	1024
BAG2	66.3408	0.0803951	0.282197	0.28489	0.775728	0.884033	51	62	85	59	67	74
BAG3	612.173	-0.413428	0.16779	-2.46396	0.0137412	0.0497813	428	493	597	738	689	751
BAG4	195.374	-0.199681	0.19902	-1.00332	0.315706	0.522756	203	174	149	193	196	268
BAG5	248.111	-0.106826	0.175669	-0.608108	0.543116	0.730834	228	248	215	300	218	292
BAG6	4805.54	0.151954	0.126398	1.20219	0.22929	0.421934	4858	4379	5475	5027	4155	5048
BAHCC1	1483.42	0.310392	0.18267	1.6992	0.0892816	0.214168	1234	1622	1915	1243	1390	1451
BAHD1	695.262	0.215755	0.138278	1.5603	0.118689	0.26381	791	638	745	665	565	794
BAIAP2	584.519	0.590494	0.178911	3.30049	0.000965172	0.0053371	827	528	699	550	431	464
BAIAP2-AS1	933.543	-0.12665	0.14859	-0.852344	0.394023	0.601971	858	847	881	1097	945	985
BAIAP2L1	282.224	1.00027	0.178799	5.59435	2.21e-08	3.2e-07	331	334	435	212	144	235
BAIAP2L2	211.136	-0.114397	0.184625	-0.619621	0.535508	0.724697	220	174	194	232	214	238
BAIAP3	332.806	-0.227461	0.238327	-0.954408	0.339877	0.547926	434	206	251	416	364	331
BAK1	580.78	-0.562743	0.175059	-3.2146	0.00130627	0.00689883	557	373	427	731	695	729
BAMBI	5490.5	-1.15111	0.145664	-7.90252	2.73e-15	7.93e-14	3794	2806	3238	8368	5662	10242
BANCR	8.45782	-1.86372	0.571652	-3.26023	0.00111323	0.0060403	5	0	1	20	14	12
BANF1	1749.55	0.0251084	0.190341	0.131912	0.895054	0.950381	2168	1462	1502	1931	1827	1568
BANK1	10.5407	-1.32445	0.518037	-2.55668	0.0105678	0.040204	2	6	6	15	15	21
BANP	415.882	0.116996	0.152201	0.768694	0.442075	0.647579	434	372	453	466	326	467
BAP1	2094.47	0.290937	0.129786	2.24166	0.0249835	0.0805752	2371	1974	2362	2038	1760	2076
BARD1	93.9211	-0.636643	0.239186	-2.66171	0.00777453	0.0311173	69	72	70	107	95	164
BARHL1	0.500111	-0.118918	0.431	-0.275912	0.782616	NA	1	0	0	0	1	1
BARX1	1.01856	0.265841	0.531039	0.500606	0.616649	NA	3	1	0	0	1	1
BARX2	1.47609	-0.0643351	0.58971	-0.109096	0.913126	NA	1	2	1	2	1	2
BASP1	1968.31	0.659414	0.147858	4.45978	8.2e-06	7.68e-05	2174	2486	2336	1838	1352	1559
BATF2	0.385991	-0.165878	0.351914	-0.47136	0.637384	NA	0	0	0	0	2	0
BATF3	17.8515	-0.0246597	0.421488	-0.0585062	0.953345	0.978661	16	19	16	19	18	19
BAX	1025.2	0.224133	0.175441	1.27754	0.20141	0.38597	1294	895	1029	1031	972	909
BAZ1A	200.103	-0.509228	0.188856	-2.69638	0.00700968	0.0285233	147	173	156	255	184	311
BAZ1B	942.533	-0.2294	0.145467	-1.57699	0.114798	0.257862	969	794	752	1158	885	1156
BAZ2A	1441.06	-0.102097	0.142906	-0.714433	0.474959	0.67578	1254	1363	1410	1386	1375	1933
BAZ2B	377.716	-0.0896099	0.164824	-0.54367	0.586669	0.762571	391	350	320	385	326	524
BBC3	280.135	0.606786	0.234348	2.58925	0.00961846	0.0372277	356	289	343	222	272	170
BBIP1	296.304	0.192084	0.16143	1.18989	0.234088	0.428246	324	267	329	307	234	330
BBOX1	1.10433	-0.0647909	0.522959	-0.123893	0.9014	NA	0	0	3	3	0	1
BBOX1-AS1	20.9821	0.359782	0.408466	0.880812	0.378419	0.586506	20	20	30	21	11	26
BBS1	794.843	-0.0132758	0.135717	-0.0978197	0.922075	0.963004	748	745	802	920	697	889
BBS10	165.478	-0.247824	0.203272	-1.21917	0.222778	0.413708	140	150	148	183	134	259
BBS12	64.5278	0.277467	0.263048	1.05481	0.29151	0.496712	78	65	63	61	53	68
BBS2	419.984	0.451597	0.195834	2.30601	0.0211098	0.0703332	378	493	541	391	237	508
BBS4	257.143	0.0250454	0.1675	0.149524	0.88114	0.943795	237	258	257	273	214	318
BBS5	366.246	-0.260093	0.151242	-1.71971	0.0854847	0.207657	334	300	332	430	362	461
BBS7	122.815	0.211794	0.210951	1.004	0.315379	0.522409	147	115	122	126	93	140
BBS9	107.648	-0.252346	0.22687	-1.1123	0.266011	0.466753	78	97	109	132	96	143
BBX	333.565	-0.408174	0.158939	-2.56812	0.0102252	0.0392205	266	292	270	406	327	469
BCAM	3732.19	-0.283659	0.13774	-2.05938	0.0394578	0.114763	3342	2683	3764	4752	3484	4673
BCAN	5.40086	-1.00043	0.601424	-1.66344	0.0962241	0.226795	1	6	0	9	10	6
BCAP29	395.834	0.156025	0.157001	0.993786	0.320327	0.527242	395	401	416	406	287	498
BCAP31	1778.54	0.266229	0.170716	1.55948	0.118882	0.264075	2373	1555	1733	1799	1576	1623
BCAR1	3316.53	0.157027	0.131291	1.19602	0.231688	0.424864	3163	3063	3944	3508	2698	3655
BCAR3	170.674	0.309655	0.225251	1.37471	0.16922	0.343589	127	210	211	162	134	181
BCAR4	0.643764	0.28672	0.461746	0.620947	0.534635	NA	2	0	1	0	0	1
BCAS1	0.871479	-0.686531	0.494405	-1.3886	0.164954	NA	0	0	0	1	3	1
BCAS2	387.924	0.0298267	0.158045	0.188723	0.85031	0.927191	415	380	341	398	347	460
BCAS3	435.725	-0.411094	0.171761	-2.39341	0.0166927	0.0582155	393	340	348	520	517	503
BCAS4	172.812	-0.157588	0.197432	-0.798188	0.424761	0.631611	178	145	150	186	183	198
BCAT1	1014.93	-0.1126	0.131389	-0.856996	0.391447	0.599675	1008	923	897	1120	882	1334
BCAT2	971.924	-0.526952	0.188942	-2.78897	0.00528763	0.0226531	961	610	735	1367	1141	1049
BCCIP	570.541	-0.129417	0.144095	-0.898141	0.36911	0.57797	582	509	489	662	509	708
BCDIN3D	108.541	0.0441506	0.245813	0.179611	0.857458	0.93118	131	97	93	134	68	141
BCDIN3D-AS1	73.0919	-0.310503	0.267555	-1.16052	0.245838	0.442121	61	71	56	85	57	119
BCHE	251.994	0.952841	0.201131	4.73742	2.16e-06	2.3e-05	327	315	330	201	103	243
BCKDHA	805.32	-0.00662058	0.168521	-0.0392864	0.968662	0.986585	891	685	758	835	848	806
BCKDHB	342.485	0.688567	0.167862	4.10199	4.1e-05	0.000331463	387	423	420	317	195	316
BCKDK	609.286	-0.0596029	0.158719	-0.375525	0.70727	0.844814	614	475	647	725	566	652
BCL10	121.085	0.354717	0.220557	1.60828	0.107774	0.246113	125	146	124	105	85	146
BCL11A	203.282	0.751982	0.192708	3.90218	9.53e-05	0.000702857	250	210	286	186	126	160
BCL11B	41.0566	0.107086	0.311054	0.344268	0.730645	0.858379	47	37	40	38	36	50
BCL2	40.2786	-1.81831	0.338255	-5.37555	7.63e-08	1.02e-06	15	19	13	71	51	82
BCL2A1	1.37759	-0.763388	0.566666	-1.34716	0.17793	NA	1	0	0	3	1	4
BCL2L1	1840.77	-0.154376	0.156756	-0.984819	0.324713	0.531503	1918	1534	1603	1993	2012	1989
BCL2L10	1.45868	-0.507102	0.562268	-0.901887	0.367117	NA	1	0	1	1	0	7
BCL2L11	224.844	0.318447	0.178949	1.77954	0.075152	0.187933	265	207	256	206	163	264
BCL2L12	585.976	0.0738438	0.169007	0.436927	0.662165	0.816911	696	492	560	587	575	608
BCL2L13	338.507	-0.384339	0.153453	-2.5046	0.0122588	0.0453979	297	263	291	424	320	469
BCL2L14	0.885033	-0.383377	0.496659	-0.771911	0.440167	NA	0	0	1	0	3	1
BCL2L15	9.91534	-0.847213	0.540871	-1.56639	0.117258	0.261642	4	3	11	7	12	25
BCL2L2	503.558	-0.271465	0.152278	-1.78269	0.0746365	0.186906	471	378	476	538	500	697
BCL2L2-PABPN1	0.474905	0.152372	0.425704	0.35793	0.720396	NA	1	0	1	0	0	1
BCL3	89.1044	0.673574	0.271184	2.48383	0.0129979	0.0476695	115	86	120	65	82	59
BCL6	90.5129	-0.76961	0.243505	-3.16056	0.00157468	0.00810051	61	73	57	124	89	153
BCL6B	19.9185	-0.908069	0.475869	-1.90823	0.0563611	0.151044	13	13	10	16	46	17
BCL7A	295.085	-0.326823	0.164757	-1.98366	0.0472933	0.132135	248	247	262	345	315	366
BCL7B	432.93	0.0988944	0.158277	0.624818	0.53209	0.72188	496	377	429	461	386	459
BCL7C	725.564	0.257195	0.186808	1.37678	0.168579	0.342829	955	657	689	772	655	611
BCL9	1193.52	0.0334436	0.127903	0.261477	0.793725	0.893128	1149	1130	1224	1225	1094	1373
BCL9L	4132.23	0.382337	0.139427	2.7422	0.00610299	0.025503	4201	4214	5189	3621	3505	4019
BCLAF1	1000.63	-0.0237463	0.145774	-0.162898	0.870598	0.937628	937	994	944	965	855	1378
BCO1	3.2686	-0.229008	0.609507	-0.375726	0.707121	0.844741	3	2	3	3	6	2
BCO2	133.968	0.0585898	0.225143	0.260234	0.794683	0.893587	151	124	123	138	89	195
BCOR	425.453	-0.481391	0.15435	-3.11882	0.00181575	0.0091454	366	339	321	497	465	594
BCORL1	628.771	-0.815677	0.163272	-4.99581	5.86e-07	6.88e-06	460	411	442	737	839	919
BCR	1111.43	-0.356674	0.145221	-2.45608	0.0140461	0.0506289	975	870	979	1289	1257	1330
BCRP2	1.16397	-0.897801	0.535188	-1.67754	0.0934365	NA	0	0	0	2	3	2
BCRP3	73.9487	-0.860144	0.278077	-3.09319	0.00198018	0.00985946	52	41	56	80	110	107
BCS1L	479.958	0.132802	0.153623	0.864464	0.387333	0.595473	517	414	530	512	418	501
BCYRN1	0.746025	-0.542086	0.455186	-1.19091	0.233688	NA	0	0	0	0	1	4
BDH1	133.364	-1.1327	0.216455	-5.23298	1.67e-07	2.12e-06	80	70	88	190	186	197
BDH2	844.954	0.45466	0.129161	3.52012	0.000431359	0.00264702	948	918	973	740	622	879
BDKRB1	114.132	3.29802	0.29857	11.046	2.29e-28	1.81e-26	146	203	261	27	10	21
BDKRB2	366.118	2.35746	0.184865	12.7523	3.03e-37	4.15e-35	531	612	645	148	80	140
BDNF	30.99	-0.204487	0.397161	-0.514871	0.606643	0.776647	19	30	34	46	13	51
BDNF-AS	40.7304	0.159963	0.320383	0.499288	0.617576	0.784898	40	33	53	45	28	49
BDP1	212.633	-0.037365	0.205691	-0.181656	0.855853	0.930116	199	222	187	223	149	321
BEAN1	60.8361	0.0470453	0.306603	0.15344	0.878051	0.942338	40	61	78	54	67	63
BEAN1-AS1	8.05283	0.354966	0.547477	0.648367	0.516748	0.711016	7	10	10	8	9	3
BECN1	530.095	-0.00868383	0.144062	-0.0602786	0.951934	0.978206	482	529	520	581	464	627
BEGAIN	87.0452	0.945559	0.274809	3.44078	0.000580042	0.00344032	124	91	123	89	42	52
BEND3	122.919	-0.778156	0.213649	-3.64221	0.000270306	0.00174988	92	80	88	148	142	202
BEND3P3	29.8824	-0.528574	0.388392	-1.36093	0.173536	0.34989	20	28	21	27	24	66
BEND4	14.8582	0.609213	0.454229	1.3412	0.179855	0.358483	18	18	18	15	6	15
BEND5	147.535	0.700685	0.207421	3.37809	0.000729918	0.00418588	207	143	185	130	93	128
BEND6	30.119	0.586351	0.40314	1.45446	0.145819	0.308651	15	43	49	27	17	30
BEND7	107.03	-0.37694	0.22101	-1.70554	0.0880941	0.211975	99	79	91	121	115	144
BEST1	75.0319	0.327621	0.28105	1.1657	0.243734	0.44013	92	54	100	81	43	88
BEST2	3.46159	-0.305599	0.608899	-0.501888	0.615746	0.783611	3	2	3	3	7	2
BEST3	1.21002	-0.372508	0.552283	-0.674487	0.500002	NA	0	1	1	2	0	4
BEST4	26.2701	-0.0279474	0.390844	-0.0715052	0.942996	0.97372	18	25	32	28	31	22
BET1	258.569	0.394518	0.17503	2.254	0.024196	0.0784612	309	277	269	235	172	302
BET1L	1027.24	0.456165	0.128308	3.55522	0.000377658	0.00235343	1198	1061	1197	927	788	993
BEX1	2058.58	-0.871737	0.19194	-4.54172	5.58e-06	5.41e-05	1923	1189	1075	2797	2621	2903
BEX2	898.218	0.699105	0.172962	4.04196	5.3e-05	0.000416641	1409	904	934	771	557	823
BEX4	2509.51	0.0836349	0.12722	0.657401	0.510923	0.706381	2775	2388	2332	2695	2151	2801
BEX5	74.4202	0.576558	0.256638	2.24658	0.0246667	0.0797844	97	85	78	68	56	60
BFAR	473.342	-0.0605324	0.143126	-0.422931	0.672346	0.824087	461	419	465	544	421	554
BFSP1	58.7227	0.275554	0.284654	0.968032	0.333029	0.540648	71	60	56	49	58	56
BGLAP	30.3994	0.384409	0.369967	1.03904	0.298788	0.504582	36	33	32	16	28	37
BGN	362.278	0.352068	0.192039	1.83332	0.0667556	0.171579	406	341	437	398	304	280
BHLHA15	1.2566	-0.172896	0.567977	-0.304407	0.760818	NA	1	1	1	3	0	2
BHLHA9	0.625035	0.0452993	0.45846	0.0988075	0.921291	NA	0	1	1	0	0	2
BHLHB9	157.489	-0.587027	0.19569	-2.99978	0.0027017	0.0128424	112	130	120	201	168	228
BHLHE40	26.4759	1.49715	0.397697	3.76456	0.000166844	0.00114229	38	38	41	8	17	13
BHLHE40-AS1	2.35358	0.638161	0.606464	1.05227	0.292678	0.498131	3	5	2	0	1	3
BHLHE41	1.29368	-0.403945	0.560115	-0.721182	0.470798	NA	0	2	0	3	1	2
BHMG1	1.7102	-1.21915	0.57462	-2.12166	0.033866	NA	0	0	0	5	2	4
BHMT	2.04678	-0.219617	0.605893	-0.362468	0.717002	0.850218	2	1	2	2	1	5
BICC1	77.1765	-1.6955	0.270038	-6.27874	3.41e-10	6.11e-09	35	26	40	112	101	167
BICD1	145.277	-0.152417	0.212093	-0.718634	0.472366	0.673597	127	153	117	149	135	199
BICD2	405.303	-0.0674821	0.160753	-0.419787	0.674641	0.825369	373	399	375	448	317	557
BID	120.269	0.623445	0.215487	2.89318	0.00381358	0.0171771	138	131	157	115	79	101
BIK	71.4788	-0.174352	0.284836	-0.612113	0.540463	0.728748	93	51	51	89	57	96
BIN1	2639.89	-0.156643	0.133666	-1.1719	0.241239	0.437321	2720	2105	2429	2818	2634	3252
BIN2	2.50124	-0.347153	0.582974	-0.595486	0.551519	0.736606	3	0	2	0	0	12
BIN3	353.87	0.600375	0.183932	3.26412	0.00109804	0.00597608	503	354	387	302	280	285
BIN3-IT1	1.31066	0.28626	0.559819	0.511344	0.60911	NA	2	3	0	1	0	2
BIRC2	406.485	-0.14962	0.177092	-0.844876	0.39818	0.606296	356	424	333	413	354	592
BIRC3	2.76121	-0.164981	0.609055	-0.27088	0.786483	0.889751	1	3	3	0	3	7
BIRC5	83.3199	-1.08252	0.308531	-3.50862	0.000450445	0.00274562	51	43	55	116	149	80
BIRC6	559.814	-0.311915	0.161104	-1.93611	0.0528545	0.143764	413	500	532	651	493	831
BIRC6-AS2	0.775557	-0.332118	0.484452	-0.685554	0.492994	NA	0	0	1	0	1	3
BIRC7	5.09495	-0.746282	0.586665	-1.27207	0.203347	0.388463	3	4	2	10	6	6
BISPR	65.6855	-0.320389	0.277969	-1.15261	0.249071	0.446092	75	42	52	86	62	83
BIVM	188.852	0.341505	0.187054	1.82571	0.0678944	0.173805	220	177	219	170	135	222
BLACAT1	11.0165	-0.875815	0.504763	-1.7351	0.082723	0.202521	7	6	7	11	19	16
BLACE	2.13955	0.350819	0.60318	0.581615	0.560826	0.743893	3	3	2	4	0	1
BLCAP	843.437	-1.22446	0.143697	-8.52114	1.58e-17	5.56e-16	567	426	464	1252	1049	1427
BLK	1.15468	0.162151	0.56002	0.289544	0.772165	NA	1	1	2	0	1	2
BLM	48.2365	-0.33404	0.321686	-1.0384	0.299083	0.504888	35	39	48	50	66	49
BLMH	622.446	-0.160697	0.138323	-1.16175	0.245335	0.441619	613	548	543	696	580	792
BLNK	2.40137	-0.0278765	0.606423	-0.0459688	0.963335	0.983572	2	0	5	4	1	3
BLOC1S1	157.187	0.468599	0.22913	2.04512	0.0408427	0.117831	245	141	148	137	116	159
BLOC1S2	325.719	0.35467	0.161928	2.1903	0.0285025	0.0889488	383	349	330	329	246	321
BLOC1S3	165.078	0.480798	0.215589	2.23016	0.0257369	0.0825719	182	160	219	140	148	134
BLOC1S4	433.377	0.413472	0.151811	2.7236	0.00645739	0.026721	505	436	501	431	288	457
BLOC1S6	351.755	-0.0915738	0.159525	-0.574041	0.56594	0.747537	330	326	332	383	285	487
BLVRA	337.087	0.388336	0.175492	2.21284	0.0269084	0.0852419	420	366	324	324	278	304
BLVRB	383.147	1.02787	0.191905	5.35615	8.5e-08	1.13e-06	591	408	506	308	236	229
BLZF1	61.2387	-0.222979	0.331229	-0.673189	0.500827	0.697711	25	69	68	70	52	89
BMF	1423.32	0.353564	0.155127	2.2792	0.0226554	0.0744535	1865	1281	1509	1315	1205	1362
BMI1	18.1163	-0.735537	0.481776	-1.52672	0.126831	0.277822	5	23	8	26	13	38
BMP1	3625.05	1.05247	0.146747	7.17201	7.39e-13	1.73e-11	4282	4487	5484	2638	2228	2416
BMP10	1.02254	-0.690353	0.493055	-1.40016	0.161467	NA	0	0	0	0	1	6
BMP2	688.671	-3.49995	0.225637	-15.5114	2.91e-54	7.3e-52	113	98	88	1310	742	2111
BMP2K	70.1701	-1.03405	0.279285	-3.7025	0.000213483	0.00142176	36	53	40	86	98	113
BMP3	0.385991	-0.165878	0.351914	-0.47136	0.637384	NA	0	0	0	0	2	0
BMP4	1903.06	0.839831	0.15034	5.58621	2.32e-08	3.34e-07	2343	2261	2508	1763	990	1555
BMP5	698.986	-0.675308	0.166386	-4.05869	4.93e-05	0.000391345	464	564	522	890	645	1225
BMP6	416.125	0.476694	0.191248	2.49255	0.012683	0.0466876	615	357	444	395	317	370
BMP7	1167.28	-1.67749	0.134985	-12.4272	1.86e-35	2.32e-33	566	483	549	1864	1446	2356
BMP8A	137.697	0.00365599	0.230487	0.015862	0.987344	0.994203	158	119	123	112	147	168
BMP8B	44.0912	0.401423	0.328767	1.22099	0.222088	0.412794	67	45	35	46	34	37
BMPER	536.674	-0.408585	0.178164	-2.29331	0.0218302	0.072422	398	468	466	617	442	913
BMPR1A	410.579	-0.627952	0.167518	-3.74856	0.000177855	0.00120978	295	329	306	493	399	701
BMPR1B	27.9043	0.623823	0.364456	1.71165	0.0869605	0.20997	35	36	29	25	15	28
BMPR2	633.913	-0.0853171	0.161398	-0.528613	0.597074	0.769701	557	620	605	643	507	935
BMS1	529.947	-0.12271	0.147278	-0.833187	0.404739	0.612778	557	446	470	574	485	682
BMS1P20	212.813	0.054422	0.19012	0.286251	0.774686	0.883736	188	233	207	214	167	282
BMS1P21	9.80339	-0.0707893	0.527104	-0.134299	0.893166	0.949529	9	4	15	13	5	15
BMS1P4	21.3128	-0.172233	0.428531	-0.401914	0.687747	0.832247	10	26	21	17	24	30
BMS1P5	13.6466	0.0731225	0.471847	0.154971	0.876844	0.941456	17	14	10	15	7	21
BNC1	1712.39	1.76293	0.384005	4.59091	4.41e-06	4.37e-05	2398	2701	2824	1021	290	955
BNC2	612.551	1.99036	0.220658	9.02011	1.88e-19	7.87e-18	812	1031	1019	321	122	326
BNIP1	99.2007	0.0725364	0.26358	0.275197	0.783165	0.887674	131	74	91	95	107	95
BNIP2	284.381	-0.0432127	0.189969	-0.227472	0.820056	0.90922	243	294	274	265	234	421
BNIP3	346.218	-0.521208	0.18585	-2.80446	0.00504014	0.0217706	303	258	259	387	444	431
BNIP3L	771.268	0.0466169	0.132827	0.35096	0.725618	0.85529	768	764	740	802	672	911
BNIPL	12.2204	-0.62628	0.480839	-1.30247	0.192755	0.374976	8	10	8	13	16	19
BOC	1345.75	1.26185	0.13551	9.31183	1.26e-20	5.79e-19	1668	1831	2027	859	704	902
BOD1	854.606	0.310619	0.13771	2.2556	0.0240958	0.0782073	999	835	919	895	611	903
BOD1L1	336.58	-0.238767	0.180163	-1.32528	0.185077	0.365218	297	311	285	325	310	524
BOK	836.974	-0.225257	0.142452	-1.58128	0.113814	0.256103	797	624	822	966	827	1035
BOK-AS1	98.885	-0.322092	0.254966	-1.26327	0.206491	0.392411	69	98	85	131	110	100
BOLA1	149.827	0.130847	0.203169	0.644033	0.519554	0.712843	161	150	143	142	144	158
BOLA3	130.752	-0.362181	0.298119	-1.21489	0.22441	0.415871	154	87	88	141	194	109
BOLA3-AS1	41.3286	-0.269514	0.309643	-0.870403	0.38408	0.59202	41	33	34	52	39	52
BOLL	0.876482	0.146045	0.514874	0.283652	0.776677	NA	0	2	1	1	1	0
BOP1	852.876	0.28742	0.169011	1.7006	0.0890182	0.21368	992	723	1021	965	668	764
BORA	71.7153	0.282097	0.255218	1.10532	0.269022	0.4703	84	79	66	69	55	79
BPESC1	0.331253	-0.18007	0.365081	-0.493232	0.621848	NA	0	0	0	0	1	1
BPGM	224.153	0.231477	0.189385	1.22226	0.221611	0.412279	219	255	227	225	202	212
BPHL	417.866	0.258941	0.162614	1.59236	0.111303	0.252075	486	404	434	465	329	396
BPIFC	0.578986	-0.344083	0.395534	-0.86992	0.384344	NA	0	0	0	0	3	0
BPNT1	285.089	0.155458	0.173948	0.893704	0.37148	0.579957	297	255	323	334	208	311
BPTF	617.285	-0.309955	0.140057	-2.21305	0.0268939	0.0852419	536	522	539	714	561	894
BRAF	33.6421	-0.362267	0.379892	-0.953606	0.340283	0.548339	29	34	21	42	18	66
BRAP	214.65	0.0974528	0.182231	0.534776	0.592805	0.766588	232	219	192	224	192	232
BRAT1	1613.5	-0.0952048	0.13582	-0.700963	0.483326	0.681971	1592	1255	1693	1868	1452	1920
BRCA1	32.2463	-1.18223	0.385295	-3.06837	0.00215227	0.010595	12	16	25	48	55	37
BRCA2	30.3489	-0.476877	0.361863	-1.31784	0.187557	0.368755	27	23	22	27	37	48
BRCAT107	0.292493	-0.166948	0.352933	-0.473031	0.636191	NA	0	0	0	1	0	1
BRCAT54	6.66096	-1.26241	0.575628	-2.19309	0.0283006	0.0886289	1	5	2	14	6	14
BRCC3	151.762	-0.088969	0.202767	-0.438775	0.660824	0.815796	123	142	161	180	138	173
BRD1	1003.3	0.305215	0.131661	2.31818	0.0204393	0.0685602	1043	1034	1146	952	731	1158
BRD2	3463.66	0.101694	0.130301	0.780452	0.435125	0.640936	3660	3249	3505	3265	3256	3894
BRD3	969.973	0.101191	0.151434	0.668219	0.503994	0.700493	864	932	1121	1073	709	1195
BRD4	1560.63	0.00575546	0.152126	0.0378335	0.96982	0.987153	1235	1575	1721	1631	1330	1956
BRD7	667.851	-0.000391277	0.147417	-0.00265422	0.997882	0.998987	641	674	620	753	513	858
BRD7P3	0.889359	0.0845877	0.474415	0.178299	0.858488	NA	0	0	3	0	2	0
BRD8	717.915	-0.0766195	0.136637	-0.560754	0.574965	0.754229	648	663	716	843	604	882
BRD9	595.535	0.336571	0.1531	2.19837	0.0279227	0.0877535	745	579	610	603	469	573
BRE	330.903	0.247044	0.166751	1.48151	0.13847	0.296756	389	321	334	350	275	319
BRE-AS1	39.2996	-0.340421	0.320436	-1.06237	0.288068	0.492635	40	28	32	51	33	57
BREA2	6.35089	-0.0213094	0.585944	-0.0363677	0.970989	0.987545	6	9	3	14	4	2
BRF1	1178.01	0.342532	0.145845	2.34861	0.0188438	0.0642721	1431	1085	1321	1146	982	1102
BRF2	269.256	-0.101099	0.170505	-0.592939	0.553222	0.738195	249	256	247	322	252	298
BRI3	1279.61	0.908746	0.184985	4.91253	8.99e-07	1.02e-05	2090	1197	1610	1112	643	1046
BRI3BP	17.2903	-0.164054	0.428969	-0.382437	0.702137	0.841913	14	15	18	17	14	28
BRICD5	347.05	-0.0370556	0.181585	-0.204067	0.838301	0.919785	398	280	318	436	305	360
BRINP1	83.5097	-0.0562733	0.26245	-0.214415	0.830224	0.915444	85	70	83	123	60	87
BRINP2	8.49725	-1.65811	0.555087	-2.98712	0.00281616	0.0132954	4	1	3	11	11	24
BRIP1	40.6722	-0.739544	0.320054	-2.31069	0.0208502	0.0697155	28	26	32	50	54	56
BRIX1	222.401	0.180346	0.178597	1.00979	0.312594	0.519494	254	208	226	229	161	272
BRK1	2661.29	0.326023	0.149464	2.18129	0.029162	0.0906578	3335	2709	2561	2659	2228	2450
BRMS1	634.612	0.497514	0.179215	2.77607	0.00550198	0.0234083	884	575	711	624	492	513
BRMS1L	113.485	-0.450188	0.224116	-2.00873	0.0445659	0.126164	80	92	104	145	126	139
BROX	231.942	0.200893	0.179585	1.11865	0.26329	0.463551	262	211	250	224	168	294
BRPF1	454.001	0.202023	0.142938	1.41337	0.157547	0.326459	473	463	474	454	369	504
BRPF3	1124.42	0.00773348	0.162605	0.0475599	0.962067	0.982899	872	1156	1238	1246	877	1440
BRS3	1.68722	-0.303443	0.553265	-0.548459	0.583377	NA	0	2	1	0	6	0
BRSK1	869.147	0.200849	0.13539	1.48348	0.137946	0.295954	977	817	908	856	751	920
BRSK2	104.134	0.649325	0.227414	2.85525	0.00430028	0.0190548	126	117	128	74	82	94
BRWD1	386.362	-0.0773812	0.187163	-0.413444	0.679281	0.827522	368	393	327	358	316	594
BRWD1-AS1	2.91019	-0.541388	0.609907	-0.887657	0.374725	0.583088	0	4	1	2	6	4
BRWD1-IT2	14.1504	0.0640357	0.453289	0.141269	0.887657	0.946399	12	15	15	15	13	15
BRWD3	212.589	-0.366352	0.187761	-1.95116	0.0510377	0.140039	195	182	160	259	183	323
BSCL2	29.7909	-0.285028	0.359486	-0.792876	0.42785	0.634518	27	21	29	38	34	30
BSDC1	1004.74	0.273518	0.13773	1.9859	0.0470447	0.131614	1014	1095	1080	919	860	1061
BSG	15674.6	0.55903	0.155481	3.5955	0.00032377	0.00204695	21854	14427	18259	14934	11413	13072
BSN	116.221	-0.354128	0.222652	-1.5905	0.111723	0.25277	96	97	102	128	101	189
BSN-AS2	1.65168	-0.650929	0.583421	-1.11571	0.264546	NA	1	0	1	1	1	7
BSND	0.51631	0.375969	0.412003	0.91254	0.361485	NA	0	1	2	0	0	0
BSPRY	1.70845	-0.638525	0.583037	-1.09517	0.273442	NA	0	2	0	3	1	5
BST1	140.113	-0.471537	0.200825	-2.348	0.0188747	0.0643528	107	105	127	171	148	194
BST2	2489.84	0.330994	0.376453	0.879243	0.379269	0.58722	4313	1789	2099	2750	1769	2318
BSX	0.360785	0.0110456	0.37487	0.0294652	0.976494	NA	0	0	1	0	1	0
BTAF1	377.21	-0.328806	0.178156	-1.84561	0.0649488	0.168049	330	334	303	419	312	618
BTBD1	650.927	-0.100424	0.155416	-0.646161	0.518175	0.711772	605	618	598	715	500	940
BTBD10	273.493	-0.0819178	0.173773	-0.471406	0.637351	0.799603	259	256	256	323	205	370
BTBD11	10.3671	-1.2879	0.520732	-2.47325	0.013389	0.0488528	5	5	4	17	19	12
BTBD16	0.349589	0.208326	0.371027	0.561485	0.574467	NA	1	1	0	0	0	0
BTBD17	34.5024	0.469981	0.380628	1.23475	0.216923	0.40575	53	21	45	37	29	21
BTBD18	4.8996	-0.539301	0.593649	-0.908452	0.36364	0.572925	3	2	5	8	8	3
BTBD19	206.005	0.559202	0.239623	2.33367	0.019613	0.0663396	179	250	288	203	95	236
BTBD2	2482.41	0.1695	0.147024	1.15288	0.248961	0.445939	2762	2118	2776	2810	2077	2410
BTBD3	269.7	-0.424029	0.185612	-2.28449	0.0223428	0.0737249	233	209	225	320	222	453
BTBD6	939.379	0.546523	0.138374	3.94962	7.83e-05	0.000590301	1149	917	1186	864	632	907
BTBD7	402.919	-0.351227	0.156304	-2.24707	0.0246353	0.0797405	318	342	365	467	371	597
BTBD8	1.38346	-0.720674	0.562843	-1.28042	0.200399	NA	0	1	0	1	4	2
BTBD9	298.354	0.179725	0.176357	1.0191	0.308157	0.515095	263	331	324	309	258	306
BTC	4.14026	1.00538	0.608535	1.65213	0.0985072	0.230682	3	8	8	1	0	5
BTD	120.796	0.069288	0.21054	0.329096	0.742083	0.865375	131	118	110	133	100	138
BTF3	4060.36	0.33806	0.147072	2.2986	0.0215277	0.0715249	5405	3874	3919	3997	3121	4131
BTF3L4	561.399	0.0565173	0.153057	0.369256	0.711937	0.847045	598	568	493	644	452	640
BTG1	800.964	-1.19442	0.165621	-7.21175	5.52e-13	1.31e-11	531	453	414	1073	892	1608
BTG2	347.25	-0.501833	0.180826	-2.77522	0.00551637	0.0234584	327	234	271	364	390	527
BTG3	202.677	-0.0746177	0.180509	-0.413374	0.679332	0.827522	208	185	179	220	193	238
BTK	3.82643	-0.417028	0.609833	-0.68384	0.494076	0.691777	1	3	4	1	9	4
BTLA	0.506576	0.312913	0.381508	0.820201	0.412102	NA	3	0	0	0	0	0
BTN1A1	0.75142	-0.0660589	0.480267	-0.137546	0.890599	NA	1	0	1	0	0	3
BTN2A1	537.659	-0.0147986	0.143333	-0.103247	0.917767	0.960519	516	524	510	546	489	663
BTN2A2	213.563	0.654012	0.202891	3.22346	0.00126652	0.00672674	217	285	256	179	166	165
BTN2A3P	16.4877	-0.170381	0.487771	-0.349306	0.726859	0.856018	4	22	18	14	13	30
BTN3A1	68.6203	0.870491	0.280156	3.10717	0.0018889	0.00946039	93	74	95	66	28	58
BTN3A2	26.7571	0.605207	0.392436	1.54218	0.12303	0.271228	37	24	35	12	23	29
BTN3A3	21.8732	1.15747	0.412895	2.80329	0.00505835	0.0218242	29	33	29	18	6	16
BTNL2	10.3515	-0.15278	0.511285	-0.298816	0.76508	0.878127	7	12	9	15	5	16
BTNL8	4.18289	1.38062	0.605599	2.27976	0.0226222	0.0743838	9	5	7	2	0	2
BTNL9	5.51284	0.960969	0.587691	1.63516	0.102016	0.236323	9	4	11	1	3	5
BTRC	377.9	-0.530757	0.154396	-3.43763	0.000586827	0.00347825	304	304	285	511	368	535
BUB1	79.7922	-1.11504	0.258734	-4.30958	1.64e-05	0.000144198	43	50	49	99	112	133
BUB1B	89.3663	-0.991811	0.243368	-4.07536	4.59e-05	0.000367778	56	51	63	131	118	124
BUB3	395.449	-0.0361183	0.149618	-0.241403	0.809242	0.903125	386	355	392	437	365	452
BUD13	249.93	0.223487	0.178715	1.25052	0.21111	0.398175	300	226	258	275	197	251
BUD31	691.433	-0.0289958	0.1655	-0.175201	0.860922	0.932836	783	570	636	748	698	719
BVES	356.275	-1.94849	0.224637	-8.67393	4.17e-18	1.55e-16	174	122	114	519	398	932
BVES-AS1	4.69028	-0.610823	0.598309	-1.02092	0.307295	0.51432	4	3	2	13	3	4
BYSL	283.782	0.100968	0.187469	0.538588	0.590171	0.764771	355	216	286	300	227	338
BZRAP1	1391.96	-0.017783	0.139843	-0.127164	0.89881	0.951419	1217	1306	1490	1369	1308	1713
BZRAP1-AS1	787.377	0.257021	0.179157	1.43462	0.151396	0.316918	1086	696	716	798	671	763
BZW1	1951.56	-0.0878498	0.130294	-0.67424	0.500159	0.697336	1838	1853	1792	2104	1615	2672
BZW2	808.066	-1.02568	0.140688	-7.29048	3.09e-13	7.5e-12	532	483	521	1118	874	1464
C10orf10	145.126	-0.440845	0.203289	-2.16856	0.0301158	0.0930607	132	114	109	168	161	195
C10orf105	12.1661	0.801617	0.492404	1.62797	0.103532	0.238721	17	15	15	4	10	11
C10orf107	14.4859	-0.96506	0.459125	-2.10196	0.0355571	0.106136	8	7	11	24	17	22
C10orf11	58.3649	0.396767	0.284898	1.39266	0.163722	0.335321	72	66	56	65	34	60
C10orf111	16.9499	-0.505102	0.457306	-1.10452	0.269369	0.470623	18	9	12	12	25	26
C10orf12	15.508	0.00793739	0.461903	0.0171841	0.98629	0.993711	13	15	17	8	18	22
C10orf128	0.292493	-0.166948	0.352933	-0.473031	0.636191	NA	0	0	0	1	0	1
C10orf131	1.69286	-0.936172	0.583132	-1.60542	0.108401	NA	1	0	0	2	2	6
C10orf142	4.44524	-1.6678	0.610129	-2.73351	0.00626627	0.0260753	0	0	2	5	13	6
C10orf2	191.212	-0.00702997	0.195252	-0.0360046	0.971279	0.987558	227	166	161	210	167	226
C10orf25	171.813	0.693539	0.205202	3.37979	0.000725419	0.00416276	218	177	225	145	132	126
C10orf32	171.642	0.291952	0.195195	1.49569	0.134734	0.29044	192	169	190	181	110	200
C10orf35	79.4427	-0.0116656	0.260884	-0.0447158	0.964334	0.983995	97	59	74	79	81	88
C10orf53	0.83569	0.143734	0.511137	0.281205	0.778553	NA	1	0	2	0	1	1
C10orf54	8.47578	-0.570305	0.569067	-1.00218	0.316259	0.523381	5	2	11	4	7	25
C10orf55	40.9043	0.844155	0.330177	2.55668	0.0105678	0.040204	50	46	60	39	16	36
C10orf62	0.671614	0.315413	0.485497	0.64967	0.515905	NA	1	1	1	1	0	0
C10orf67	8.94677	0.251349	0.541502	0.464169	0.642527	0.802821	7	11	11	16	4	5
C10orf71	20.1711	-3.63342	0.523709	-6.93786	3.98e-12	8.71e-11	3	0	0	31	37	56
C10orf71-AS1	0.655702	-0.475793	0.438798	-1.08431	0.278227	NA	0	0	0	3	1	0
C10orf76	335.956	0.00127915	0.157819	0.00810519	0.993533	0.997028	318	298	360	363	306	383
C10orf82	112.515	-0.16642	0.222339	-0.748494	0.454162	0.65816	121	97	89	137	102	136
C10orf88	113.347	-0.043602	0.250177	-0.174284	0.861642	0.932883	115	98	112	106	76	191
C10orf90	4.27218	1.38669	0.603312	2.29847	0.0215353	0.0715369	5	8	8	2	1	1
C10orf91	3.20316	0.769502	0.611138	1.25913	0.207983	0.393986	5	3	6	4	1	0
C10orf95	53.6971	-0.301589	0.289133	-1.04308	0.29691	0.502456	37	51	50	63	57	66
C11orf1	138.317	0.66343	0.240492	2.75864	0.00580423	0.0244782	226	139	132	132	84	118
C11orf16	2.00034	-0.381181	0.605357	-0.62968	0.528904	0.719692	1	2	1	2	3	3
C11orf21	69.5754	-1.41578	0.267651	-5.28966	1.23e-07	1.58e-06	40	30	36	101	98	122
C11orf24	493.187	0.066064	0.158392	0.417093	0.676611	0.826479	534	418	516	590	402	523
C11orf30	272.182	-0.406125	0.177255	-2.29119	0.0219524	0.0727692	242	214	222	369	223	401
C11orf31	1119.29	0.378224	0.1802	2.09891	0.0358245	0.106666	1642	1018	1031	1147	790	1126
C11orf42	0.541516	0.149828	0.438774	0.341468	0.732751	NA	0	1	1	0	1	0
C11orf45	11.7814	0.265055	0.505556	0.524283	0.600082	0.772039	8	16	14	5	10	18
C11orf49	555.596	0.10524	0.169283	0.621681	0.534152	0.724001	665	433	581	633	465	580
C11orf53	0.308471	-0.149727	0.335972	-0.445652	0.655848	NA	0	0	0	2	0	0
C11orf54	239.628	-0.177706	0.184784	-0.961697	0.336202	0.543623	196	193	264	301	208	295
C11orf57	339.608	-0.0813774	0.171092	-0.475634	0.634335	0.797109	299	339	318	389	258	468
C11orf58	1628.9	-0.0190444	0.125888	-0.15128	0.879755	0.943237	1555	1613	1520	1802	1364	2015
C11orf63	17.1712	-0.297881	0.427046	-0.697539	0.485465	0.683908	13	13	18	22	15	24
C11orf65	2.86965	1.30688	0.610251	2.14155	0.0322298	0.0981087	8	4	3	1	0	1
C11orf68	793.724	0.19101	0.153698	1.24276	0.213956	0.401844	944	707	812	891	645	784
C11orf70	24.7022	-0.450714	0.382935	-1.177	0.239197	0.434575	19	22	18	24	28	39
C11orf71	140.112	-0.00243638	0.219323	-0.0111086	0.991137	0.996388	128	142	136	187	98	161
C11orf72	1.1733	0.360072	0.533441	0.674999	0.499677	NA	0	2	3	2	0	0
C11orf73	412.572	-0.0566952	0.161403	-0.351264	0.72539	0.855191	443	357	375	507	325	502
C11orf74	202.592	0.314367	0.204826	1.5348	0.124833	0.274448	255	219	178	169	182	209
C11orf80	332.739	1.16823	0.169724	6.88312	5.86e-12	1.26e-10	418	434	492	247	152	244
C11orf84	1665.42	0.279253	0.156678	1.78233	0.0746947	0.186999	2069	1484	1768	1796	1376	1509
C11orf85	0.53032	0.385427	0.414785	0.929221	0.352774	NA	1	2	0	0	0	0
C11orf87	2.68922	0.240423	0.611105	0.393424	0.694006	0.836526	2	4	3	3	2	2
C11orf88	12.6152	1.82519	0.509599	3.58162	0.000341467	0.00214515	14	28	19	6	2	5
C11orf91	2.32405	-0.154649	0.60995	-0.253544	0.799848	0.897019	2	1	3	2	3	3
C11orf94	9.99636	-0.133082	0.533494	-0.249453	0.803011	0.899096	12	9	6	16	12	4
C11orf95	1771.27	0.372677	0.143467	2.59764	0.00938656	0.0365204	1661	2101	2031	1655	1372	1810
C11orf96	47.073	-3.25049	0.378668	-8.584	9.16e-18	3.34e-16	5	6	9	87	62	132
C11orf98	20.219	0.044713	0.41383	0.108047	0.913959	0.959051	25	13	22	25	18	19
C12orf10	534.568	0.137328	0.188057	0.73025	0.465238	0.6684	702	429	501	572	493	514
C12orf29	202.029	0.229855	0.180906	1.27057	0.20388	0.389107	224	208	201	202	173	205
C12orf4	153.977	0.0432187	0.193207	0.223691	0.822998	0.911266	156	146	152	176	120	184
C12orf42	1.82258	0.14076	0.595408	0.236409	0.813115	NA	2	1	3	0	2	3
C12orf43	219.502	0.0780846	0.174243	0.448137	0.654054	0.810918	233	214	207	236	189	245
C12orf45	89.1923	-0.308626	0.261755	-1.17907	0.238372	0.433636	105	65	60	108	95	106
C12orf49	630.969	-0.138903	0.158223	-0.877892	0.380003	0.587699	599	590	551	820	481	806
C12orf50	0.347231	-0.185107	0.369583	-0.500854	0.616474	NA	0	0	0	1	1	0
C12orf54	0.860896	-0.13173	0.513143	-0.256713	0.7974	NA	1	0	1	0	2	1
C12orf56	5.07879	-0.232137	0.589957	-0.393482	0.693964	0.836526	4	2	7	10	4	4
C12orf57	875.18	0.333087	0.175421	1.89878	0.0575936	0.153511	1166	764	917	964	682	767
C12orf60	9.93458	0.629933	0.517246	1.21786	0.223277	0.414214	11	11	15	4	6	13
C12orf65	177.049	0.054582	0.196033	0.278433	0.78068	0.886556	189	147	189	213	148	184
C12orf66	26.4258	0.0912177	0.398957	0.228641	0.819148	0.908665	34	23	23	37	11	35
C12orf71	1.09994	0.176637	0.542043	0.325872	0.744521	NA	1	1	2	0	0	3
C12orf73	137.524	-0.00373949	0.210043	-0.0178035	0.985796	0.993483	154	128	116	144	131	155
C12orf75	147.826	-0.880704	0.217084	-4.05697	4.97e-05	0.000393709	82	106	109	180	193	228
C12orf76	89.231	-0.26512	0.242009	-1.09549	0.2733	0.475264	85	71	79	102	71	140
C12orf79	6.12751	-2.19178	0.595644	-3.67968	0.000233531	0.00154032	1	1	0	9	12	15
C14orf1	817.135	0.273471	0.162368	1.68427	0.0921294	0.219318	984	749	871	877	697	721
C14orf105	0.811553	0.404328	0.491991	0.82182	0.411179	NA	2	0	2	0	0	1
C14orf119	440.833	0.0517599	0.167418	0.309166	0.757195	0.874365	514	398	391	493	399	459
C14orf132	357.293	0.0434087	0.186261	0.233053	0.81572	0.906553	273	374	403	369	339	388
C14orf142	84.4389	-0.0215042	0.251598	-0.0854705	0.931887	0.968374	78	91	73	75	84	107
C14orf159	678.289	0.0391995	0.151649	0.258489	0.79603	0.894368	794	568	638	741	578	786
C14orf166	1223.17	0.199262	0.142442	1.3989	0.161843	0.332581	1463	1138	1202	1345	918	1332
C14orf169	266.762	0.0982792	0.189195	0.519459	0.60344	0.774426	291	264	245	325	230	248
C14orf178	17.0588	-0.353948	0.448452	-0.789267	0.429956	0.636149	10	20	12	15	17	30
C14orf180	23.3497	-2.04322	0.45692	-4.47173	7.76e-06	7.29e-05	6	1	14	50	29	47
C14orf2	1166.64	0.254659	0.202013	1.2606	0.207451	0.393455	1709	1003	990	1174	1065	1042
C14orf28	57.7834	-0.0812632	0.284137	-0.286	0.774878	0.883736	47	53	63	57	46	87
C14orf37	194.28	0.134003	0.238165	0.562649	0.573674	0.753131	138	206	247	183	130	282
C14orf39	49.9109	-0.0121052	0.299198	-0.0404589	0.967727	0.986083	58	38	49	62	35	63
C14orf79	192.031	0.558665	0.196709	2.84007	0.00451043	0.019843	238	197	232	185	146	149
C14orf80	178.484	-0.707834	0.20387	-3.47199	0.000516611	0.0030981	130	112	148	219	232	238
C14orf93	142.294	0.268584	0.20377	1.31808	0.187478	0.368652	157	146	149	156	113	134
C15orf27	11.9721	0.195643	0.48641	0.402218	0.687523	0.832224	16	8	14	9	9	17
C15orf39	904.558	0.748854	0.151005	4.95915	7.08e-07	8.2e-06	1203	951	1155	840	549	725
C15orf40	309.258	0.124487	0.164874	0.755041	0.450225	0.654528	305	323	308	343	229	366
C15orf41	166.459	-0.57217	0.192176	-2.97733	0.00290768	0.0136866	129	114	144	207	166	260
C15orf48	2.42219	-0.0259855	0.609853	-0.0426095	0.966013	0.985068	3	1	3	1	2	5
C15orf52	164.913	-0.17209	0.224245	-0.767421	0.442831	0.647899	125	163	159	153	193	194
C15orf56	2.35383	-0.700488	0.601818	-1.16395	0.244443	0.440671	1	1	1	1	8	1
C15orf57	112.468	-0.0641086	0.228173	-0.280964	0.778738	0.885981	112	100	107	153	92	117
C15orf59	279.647	1.19102	0.180013	6.61634	3.68e-11	7.35e-10	353	366	415	193	162	168
C15orf59-AS1	8.16551	0.874334	0.536172	1.6307	0.102955	0.237921	13	11	9	6	3	7
C15orf61	127.464	0.67828	0.233888	2.90002	0.00373138	0.0168639	197	137	125	120	80	105
C15orf62	80.9362	0.0614608	0.250314	0.245535	0.806042	0.901076	76	89	74	74	78	95
C15orf65	13.4861	-0.434443	0.470905	-0.922572	0.35623	0.565548	13	12	7	15	12	24
C16orf13	604.348	0.581374	0.162983	3.56708	0.000360986	0.00225743	819	584	711	556	448	499
C16orf45	213.293	-0.955193	0.205647	-4.64481	3.4e-06	3.45e-05	140	131	144	289	309	272
C16orf46	47.12	-0.15666	0.305392	-0.512981	0.607965	0.777614	41	52	35	56	45	55
C16orf52	146.211	-0.279823	0.23649	-1.18323	0.236717	0.431682	100	131	151	169	107	243
C16orf54	110.462	0.828494	0.284942	2.90759	0.00364226	0.0165334	86	152	177	73	53	125
C16orf58	2398.6	0.328796	0.12839	2.56091	0.0104398	0.0398958	2820	2214	2744	2288	1922	2445
C16orf59	212.02	-0.472734	0.215854	-2.19006	0.0285198	0.0889872	208	136	169	274	260	228
C16orf62	451.315	0.257156	0.164836	1.56008	0.118742	0.263836	490	380	564	473	346	474
C16orf70	290.429	-0.0108723	0.167862	-0.0647694	0.948358	0.97631	306	250	284	308	280	321
C16orf71	32.9747	0.250332	0.338307	0.739955	0.459328	0.662685	39	29	37	36	25	33
C16orf72	474.685	-0.28744	0.145439	-1.97637	0.0481132	0.133931	430	411	397	589	432	629
C16orf74	268.806	0.466305	0.206393	2.2593	0.0238646	0.0776262	336	270	303	278	225	189
C16orf86	89.8644	-0.74578	0.254757	-2.92742	0.00341785	0.0156621	78	50	64	114	120	117
C16orf87	172.37	-0.257211	0.194153	-1.32479	0.185241	0.36543	152	162	139	197	179	211
C16orf89	2.1053	-0.670626	0.605084	-1.10832	0.267725	0.469012	1	1	1	6	2	2
C16orf91	156.38	0.105942	0.21668	0.488933	0.624889	0.790362	200	133	139	185	126	162
C16orf92	0.865679	0.14076	0.51389	0.27391	0.784153	NA	2	1	0	1	1	0
C16orf93	113.454	0.234598	0.245188	0.956806	0.338665	0.54645	141	88	129	101	114	105
C16orf95	36.5682	0.331721	0.345451	0.960256	0.336927	0.544498	51	27	42	42	28	30
C16orf96	75.4742	0.266465	0.247712	1.0757	0.28206	0.485666	75	82	83	71	56	89
C17orf100	56.7226	-0.326366	0.283346	-1.15183	0.249392	0.446577	42	48	55	58	55	88
C17orf102	2.18433	0.139274	0.60428	0.23048	0.817719	0.907757	0	3	4	2	2	2
C17orf104	16.1424	-0.260172	0.454723	-0.572155	0.567217	0.748414	17	7	18	18	20	17
C17orf107	97.512	0.528398	0.242587	2.17818	0.0293925	0.0912312	106	112	119	97	50	107
C17orf112	0.385991	-0.165878	0.351914	-0.47136	0.637384	NA	0	0	0	0	2	0
C17orf47	0.695751	0.00818939	0.488045	0.01678	0.986612	NA	0	1	1	1	1	0
C17orf50	2.25333	-0.124755	0.608289	-0.205092	0.837501	0.919442	2	1	3	1	2	5
C17orf51	6.418	-0.0428228	0.574223	-0.0745752	0.940553	0.972525	2	8	8	9	7	4
C17orf53	72.1339	-0.33513	0.260222	-1.28786	0.197795	0.381711	63	51	70	84	82	85
C17orf58	104.615	0.516301	0.221137	2.33476	0.0195558	0.0661943	120	106	134	97	70	103
C17orf59	269.625	0.024287	0.203873	0.119128	0.905174	0.954858	299	234	256	272	298	249
C17orf62	1444.32	0.661846	0.153569	4.30978	1.63e-05	0.000144144	1863	1400	1906	1367	960	1163
C17orf64	0.505507	0.368627	0.409798	0.899535	0.368368	NA	2	0	1	0	0	0
C17orf67	32.813	0.0159825	0.337997	0.0472858	0.962285	0.982934	34	31	31	36	24	44
C17orf74	1.25418	0.0677649	0.567699	0.119368	0.904984	NA	1	1	2	1	0	3
C17orf75	354.378	-0.166621	0.159012	-1.04786	0.294705	0.500006	340	313	315	451	304	429
C17orf78	0.9798	0.287799	0.528418	0.544643	0.585999	NA	3	1	0	1	0	1
C17orf80	373.49	-0.0309716	0.151182	-0.204863	0.837679	0.919442	368	359	344	406	324	460
C17orf82	18.7262	-0.781365	0.419903	-1.86082	0.0627694	0.163853	13	11	14	30	17	31
C17orf85	706.559	-0.215181	0.138156	-1.55751	0.119349	0.264799	603	643	648	846	617	942
C17orf89	422.497	0.036048	0.204014	0.176694	0.859749	0.932249	533	367	343	540	370	390
C17orf96	41.5574	-0.236436	0.365539	-0.646816	0.517751	0.711662	37	34	38	32	66	37
C17orf97	68.6374	0.339946	0.290298	1.17103	0.241588	0.43779	96	47	83	59	46	87
C17orf98	0.600964	-0.43909	0.430377	-1.02024	0.307613	NA	0	0	0	3	0	1
C18orf21	181.364	0.524543	0.198042	2.64865	0.00808145	0.0321725	251	170	204	154	138	171
C18orf25	229.66	-0.72112	0.181782	-3.96696	7.28e-05	0.000553178	156	168	175	269	269	363
C18orf32	20.4615	-0.0516317	0.411208	-0.125561	0.900079	0.95213	24	19	15	27	19	19
C18orf54	56.0586	-0.317423	0.284493	-1.11575	0.26453	0.464817	44	53	46	63	64	67
C18orf63	1.24717	0.121492	0.530737	0.228912	0.818937	NA	0	4	0	0	2	1
C18orf65	12.4426	0.241779	0.490256	0.493169	0.621893	0.78825	22	10	8	12	10	13
C18orf8	221.801	0.212559	0.17426	1.21978	0.222549	0.413454	257	205	231	218	179	249
C19orf12	450.505	-0.0820389	0.152574	-0.537699	0.590785	0.765112	393	447	427	529	391	540
C19orf18	33.3328	-0.177041	0.343362	-0.51561	0.606127	0.776202	29	28	33	31	39	40
C19orf24	532.493	-0.0193034	0.210662	-0.0916323	0.92699	0.965443	697	332	516	618	499	554
C19orf25	480.045	0.00921919	0.178298	0.0517067	0.958762	0.981772	531	382	488	548	474	459
C19orf26	602.299	0.0979653	0.178302	0.549436	0.582706	0.759969	695	445	677	609	578	618
C19orf33	77.0066	0.110586	0.289833	0.381551	0.702794	0.842531	103	73	56	60	83	85
C19orf35	4.73889	0.181935	0.588774	0.309006	0.757317	0.874393	6	5	4	5	5	3
C19orf38	4.19693	-0.293665	0.600822	-0.488771	0.625004	0.790395	1	4	5	4	6	5
C19orf43	3216.16	0.400824	0.183912	2.17943	0.0292996	0.0909905	4646	2930	3105	3284	2652	2624
C19orf44	524.386	0.155006	0.144832	1.07025	0.284507	0.488465	565	463	580	547	433	579
C19orf45	1.46826	0.612068	0.571347	1.07127	0.284047	NA	4	1	2	0	0	2
C19orf47	245.692	-0.121977	0.196046	-0.622185	0.53382	0.723731	244	177	263	256	265	273
C19orf48	660.167	0.282178	0.172734	1.6336	0.102344	0.236837	851	563	699	687	563	599
C19orf52	210.737	-0.192334	0.186939	-1.02886	0.303545	0.510103	195	185	190	287	173	252
C19orf53	1122.66	0.167178	0.198915	0.840451	0.400656	0.608662	1527	941	993	1258	1047	955
C19orf54	306.587	0.124209	0.166484	0.74607	0.455625	0.659162	325	280	324	321	281	311
C19orf57	34.453	0.688076	0.343792	2.00143	0.0453462	0.127946	37	41	47	25	29	25
C19orf60	683.336	0.301344	0.174766	1.72427	0.0846586	0.2061	864	545	795	692	576	634
C19orf66	119.897	0.4306	0.250842	1.71662	0.086049	0.208489	188	99	117	122	76	124
C19orf67	2.15229	-0.193658	0.597702	-0.324004	0.745935	0.868363	1	3	1	2	5	0
C19orf68	297.859	0.0721186	0.18389	0.392183	0.694923	0.83701	301	287	297	265	312	320
C19orf70	448.264	0.084748	0.184945	0.458233	0.646785	0.806353	542	368	433	511	421	416
C19orf71	179.866	-0.599683	0.196257	-3.05561	0.00224607	0.0109599	136	128	148	199	217	263
C19orf73	40.3499	0.198729	0.334621	0.593891	0.552585	0.737511	59	33	34	41	37	38
C19orf80	7.55072	0.0971625	0.548001	0.177304	0.85927	0.931956	9	4	10	6	9	7
C19orf81	125.338	0.716377	0.262066	2.73358	0.00626498	0.0260753	219	102	138	111	87	93
C19orf84	8.35198	-0.296448	0.529778	-0.559571	0.575772	0.75476	5	6	10	10	8	12
C1D	249.557	0.151353	0.176252	0.858731	0.390489	0.598674	296	237	230	253	213	275
C1GALT1	552.233	0.0720599	0.159822	0.450877	0.652078	0.809424	514	575	552	542	420	754
C1GALT1C1	105.98	0.271777	0.217612	1.2489	0.2117	0.398782	119	103	116	103	78	122
C1orf100	0.878164	0.419499	0.51828	0.809406	0.418282	NA	1	1	2	0	1	0
C1orf101	23.282	0.400991	0.406347	0.986818	0.323732	0.530577	15	30	33	18	17	27
C1orf105	29.62	-3.90363	0.507303	-7.69486	1.42e-14	3.9e-13	2	0	2	39	83	50
C1orf106	105.002	-1.06322	0.250035	-4.2523	2.12e-05	0.000181861	58	65	69	140	161	139
C1orf109	241.882	0.0813634	0.178696	0.455318	0.648881	0.807423	236	254	231	286	184	273
C1orf110	0.322025	0.0102529	0.362687	0.0282693	0.977447	NA	0	0	1	1	0	0
C1orf111	0.948195	-0.742132	0.506245	-1.46596	0.14266	NA	0	0	0	4	1	1
C1orf112	62.068	-0.401668	0.266412	-1.50769	0.131633	0.285223	51	46	57	71	66	86
C1orf115	12.6495	-1.07159	0.526182	-2.03653	0.041697	0.11958	1	5	14	14	18	26
C1orf116	4.77054	1.01088	0.593935	1.702	0.0887557	0.21325	5	6	10	2	3	2
C1orf122	1634.78	0.216134	0.142543	1.51627	0.12945	0.281861	1874	1467	1775	1863	1198	1713
C1orf123	610.291	0.332702	0.148516	2.24018	0.0250793	0.0807751	736	605	638	642	457	596
C1orf127	3.16757	-0.519186	0.611061	-0.849647	0.395521	0.603587	0	2	4	4	5	4
C1orf131	149.744	0.377253	0.208378	1.81043	0.0702292	0.17828	190	125	180	137	112	160
C1orf145	113.271	0.488643	0.220525	2.21582	0.0267042	0.0847755	118	126	142	92	77	128
C1orf146	1.11295	-0.586189	0.546168	-1.07328	0.283148	NA	0	1	0	3	1	2
C1orf159	552.807	0.688997	0.176667	3.89997	9.62e-05	0.000708142	774	526	695	514	383	414
C1orf162	22.4505	-0.284368	0.408089	-0.696829	0.48591	0.684062	27	16	15	36	18	25
C1orf167	218.768	-0.290947	0.198871	-1.46299	0.143469	0.30464	149	215	203	241	225	290
C1orf168	274.354	1.95786	0.227856	8.5925	8.51e-18	3.11e-16	340	424	516	155	65	125
C1orf174	236.486	0.142203	0.184311	0.771538	0.440388	0.645689	214	227	281	260	170	284
C1orf177	0.541516	0.149828	0.438774	0.341468	0.732751	NA	0	1	1	0	1	0
C1orf186	0.331253	-0.18007	0.365081	-0.493232	0.621848	NA	0	0	0	0	1	1
C1orf189	1.03043	0.275667	0.534675	0.515578	0.606149	NA	2	2	0	0	1	1
C1orf194	3.34695	-0.0784444	0.611135	-0.128359	0.897865	0.951275	1	6	2	8	2	1
C1orf195	0.511984	-0.120386	0.433213	-0.277892	0.781096	NA	0	1	0	0	1	1
C1orf198	1626.09	-0.314245	0.16043	-1.95876	0.0501406	0.138188	1108	1453	1631	1843	1524	2346
C1orf204	13.8507	0.108171	0.469261	0.230514	0.817693	0.907757	18	12	12	19	12	10
C1orf21	394.334	-0.499934	0.179853	-2.77967	0.00544136	0.0232058	389	287	269	501	355	621
C1orf210	4.62092	-0.0622319	0.590471	-0.105394	0.916063	0.960098	5	3	5	3	5	7
C1orf216	169.343	-0.0665608	0.205882	-0.323296	0.746471	0.868562	172	136	172	185	179	172
C1orf220	24.115	-0.00952977	0.378006	-0.0252106	0.979887	0.991488	24	20	26	25	19	33
C1orf226	191.977	0.13197	0.180394	0.731566	0.464433	0.667636	209	171	204	196	163	216
C1orf228	87.3606	0.610815	0.264909	2.30576	0.0211243	0.0703682	110	84	117	89	39	92
C1orf229	55.9338	-0.258129	0.30276	-0.852587	0.393888	0.601971	56	53	37	73	62	54
C1orf233	259.74	0.965176	0.190858	5.05704	4.26e-07	5.12e-06	358	258	391	210	150	186
C1orf234	0.902977	0.384434	0.501193	0.767038	0.443059	NA	0	3	1	0	1	0
C1orf27	204.655	-0.0121305	0.189713	-0.0639413	0.949017	0.976503	180	223	186	207	185	254
C1orf35	676.543	0.238372	0.165686	1.43869	0.150237	0.315122	863	548	726	704	547	693
C1orf43	1066.79	-0.111301	0.143002	-0.778319	0.436381	0.641938	1088	989	895	1312	893	1298
C1orf50	121.923	-0.390134	0.232542	-1.6777	0.0934065	0.221559	124	81	100	167	131	134
C1orf52	383.616	-0.0889653	0.157769	-0.563894	0.572826	0.752598	392	333	354	381	356	509
C1orf53	68.3596	1.26667	0.262691	4.8219	1.42e-06	1.56e-05	104	87	93	43	35	44
C1orf54	84.4229	0.0825508	0.244237	0.337994	0.735368	0.861062	99	80	73	87	77	92
C1orf56	258.536	0.401181	0.215447	1.86208	0.0625913	0.163496	388	217	256	281	180	237
C1orf61	0.98453	-0.510726	0.532178	-0.95969	0.337211	NA	0	0	1	1	2	2
C1orf64	0.693107	-0.264937	0.468756	-0.565192	0.571943	NA	1	0	0	0	2	1
C1orf74	45.6128	-0.296663	0.297252	-0.99802	0.31827	0.525278	42	35	41	51	46	62
C1orf94	0.323094	0.0102755	0.363043	0.0283038	0.97742	NA	1	0	0	1	0	0
C1orf95	72.98	-4.26515	0.384115	-11.1038	1.2e-28	9.79e-27	6	4	4	153	156	122
C1QBP	1067.82	-0.148437	0.135861	-1.09257	0.274584	0.476522	1094	890	956	1241	1021	1254
C1QC	0.361854	0.0110667	0.375186	0.0294967	0.976468	NA	1	0	0	0	1	0
C1QL1	480.692	-0.286701	0.18821	-1.52331	0.127681	0.279137	385	384	485	650	515	472
C1QL2	7.34843	-0.805429	0.575444	-1.39967	0.161613	0.332223	10	2	1	15	6	12
C1QL3	3.40987	-1.66388	0.610814	-2.72404	0.00644883	0.026695	1	0	0	4	5	12
C1QL4	36.2416	3.62125	0.428587	8.44928	2.93e-17	1.01e-15	85	54	62	6	2	3
C1QTNF1	146.372	-0.855654	0.248411	-3.44451	0.000572097	0.00340112	110	99	87	179	229	170
C1QTNF1-AS1	2.74272	-1.69366	0.603416	-2.80678	0.00500391	0.0216351	0	0	0	4	6	7
C1QTNF2	15.25	0.966019	0.450763	2.14308	0.0321069	0.0978681	22	22	17	11	7	12
C1QTNF3	119.33	1.2873	0.222649	5.78176	7.39e-09	1.13e-07	146	170	179	81	58	74
C1QTNF4	363.044	0.48303	0.264439	1.82662	0.0677573	0.173503	613	250	385	393	166	413
C1QTNF6	1327.13	0.794357	0.157643	5.03897	4.68e-07	5.59e-06	1810	1384	1720	1081	957	950
C1QTNF7	5.97926	1.26889	0.58415	2.17221	0.0298401	0.0923794	10	9	9	3	0	5
C1QTNF8	1.0535	0.0122256	0.53469	0.0228649	0.981758	NA	0	2	1	0	2	1
C1QTNF9	2.29501	0.605281	0.603842	1.00238	0.316159	0.523312	3	1	6	3	0	1
C1QTNF9B	39.4539	0.415208	0.326444	1.27191	0.203404	0.38849	50	36	47	32	24	51
C1QTNF9B-AS1	28.7886	0.603944	0.383663	1.57415	0.115452	0.258648	43	23	38	24	12	36
C1R	141.981	0.32024	0.22187	1.44336	0.148918	0.313166	170	124	166	151	122	117
C1RL	475.291	0.353116	0.14966	2.35945	0.0183018	0.0628079	486	512	551	488	348	476
C1RL-AS1	86.4471	0.10211	0.251231	0.406438	0.68442	0.830497	82	87	91	68	76	119
[truncated: 18,648 more rows]
