# Supplementary material for: Transcriptome and DNA Methylome Dynamics during Triclosan-Induced Cardiomyocyte Differentiation Toxicity
Source: Stem Cells Int. 2018 Oct 29;2018:8608327. doi: 10.1155/2018/8608327 (PMC6231387; doi:10.1155/2018/8608327)
Supplement: Supplementary 4 — Table S2: differentially methylated regions in H9-derived CMs in the TCS-treated and the control groups. [file 8608327.f4.xlsx]

## Sheet: Sheet1
DMRID	chr	start	end	width	fold changes	cg probes	FDRp
DMR_1	chr12	111618925	111620313	1388	-1.78555	11	0
DMR_2	chr6	76202595	76204370	1775	1.60893	12	0
DMR_3	chr8	11565226	11567721	2495	1.1137	16	0
DMR_4	chr17	46666926	46669113	2187	-1.77851	10	1.61e-06
DMR_5	chr3	46448084	46449100	1016	1.41006	12	2.42e-06
DMR_6	chr17	46607103	46609350	2247	-1.05576	15	2.42e-06
DMR_7	chr17	75469976	75471401	1425	-1.58272	10	2.42e-06
DMR_8	chr2	88366145	88367503	1358	1.64697	9	3.23e-06
DMR_10	chr1	66257822	66258022	200	-11.0389	3	4.84e-06
DMR_9	chr17	46650310	46652938	2628	-0.864577	17	5.64e-06
DMR_13	chr16	89069935	89070924	989	1.86591	8	9.68e-06
DMR_11	chr21	35827824	35828820	996	1.3141	10	1.29e-05
DMR_12	chr10	123353298	123353956	658	1.24734	11	1.29e-05
DMR_17	chr9	26892906	26893343	437	5.09712	4	1.45e-05
DMR_16	chr1	109849545	109850722	1177	1.66855	8	1.85e-05
DMR_14	chr5	58652602	58653738	1136	1.25904	10	2.02e-05
DMR_15	chr8	42064880	42066228	1348	-1.25634	10	2.1e-05
DMR_18	chr13	113655370	113656424	1054	0.988959	14	2.34e-05
DMR_21	chr2	61243860	61244367	507	1.6536	7	3.63e-05
DMR_22	chr5	67521729	67522532	803	1.65036	7	3.63e-05
DMR_19	chr16	46781076	46782760	1684	1.20293	10	4.03e-05
DMR_20	chr6	32135370	32136431	1061	1.20245	10	4.03e-05
DMR_36	chr16	31072474	31072493	19	9.65273	2	5.4e-05
DMR_23	chr17	40337513	40337892	379	1.21679	9	7.01e-05
DMR_24	chr10	48416391	48417904	1513	0.925843	13	7.1e-05
DMR_25	chr4	38110810	38111786	976	1.19646	9	8.95e-05
DMR_26	chr5	34043140	34043724	584	-1.65923	6	8.95e-05
DMR_34	chr15	101728234	101728653	419	1.46047	7	0.000104821
DMR_29	chr13	33780078	33780362	284	-1.61501	6	0.000105627
DMR_35	chr22	26137980	26138429	449	1.45253	7	0.000108046
DMR_37	chr3	149095283	149096029	746	-1.42113	7	0.000123366
DMR_31	chr5	124080713	124082630	1917	1.2576	8	0.00012901
DMR_27	chr14	57277178	57278084	906	-1.13771	9	0.000134655
DMR_28	chr11	16759522	16760490	968	0.694383	15	0.000135461
DMR_78	chr11	123525443	123525443	0	-8.21955	1	0.000139493
DMR_32	chr3	137728329	137729296	967	0.834313	13	0.000142718
DMR_67	chr2	40739515	40739771	256	1.95934	5	0.000146749
DMR_40	chr11	114165661	114166636	975	-1.37126	7	0.000156425
DMR_30	chr10	88427813	88428429	616	0.965456	11	0.00015965
DMR_82	chr2	192109755	192109995	240	-4.1679	3	0.000161263
DMR_39	chr15	74466337	74466933	596	-1.50899	6	0.000175777
DMR_41	chr2	101593139	101593793	654	-1.32181	7	0.000191097
DMR_33	chr22	51016839	51017432	593	0.990985	10	0.000207223
DMR_46	chr17	80330606	80330901	295	1.46849	6	0.000224156
DMR_49	chr15	34393597	34394138	541	1.44854	6	0.000242701
DMR_48	chr3	15540137	15540665	528	-1.27425	7	0.00024512
DMR_50	chr18	59997009	59998007	998	1.44271	6	0.00025157
DMR_134	chr9	136326006	136326006	0	6.70874	1	0.000259633
DMR_38	chr18	53254430	53255994	1564	0.809365	12	0.000278179
DMR_42	chr6	41019912	41021161	1249	1.12777	8	0.00028221
DMR_155	chr5	102090704	102090704	0	-6.41374	1	0.000294305
DMR_52	chr8	134114834	134115347	513	-1.40391	6	0.000303174
DMR_44	chr2	238321568	238322972	1404	-1.10661	8	0.000318494
DMR_45	chr2	237172609	237173453	844	1.10567	8	0.000319301
DMR_53	chr15	50646057	50646617	560	1.21782	7	0.000324139
DMR_93	chr12	95010017	95010321	304	1.63747	5	0.000345909
DMR_94	chr3	112875935	112877046	1111	-1.62631	5	0.000354779
DMR_51	chr7	97922028	97923834	1806	1.07559	8	0.000385419
DMR_43	chr19	35629701	35630651	950	0.768547	12	0.000397513
DMR_97	chr2	234294036	234294650	614	1.58438	5	0.000423315
DMR_55	chr12	109554047	109554767	720	1.16365	7	0.000463631
DMR_124	chr17	35242555	35242990	435	1.96249	4	0.000486208
DMR_101	chr7	130019503	130020130	627	-1.5316	5	0.000503141
DMR_61	chr20	42816226	42817602	1376	1.28824	6	0.000517654
DMR_54	chr5	1840181	1841622	1441	1.03152	8	0.000537006
DMR_105	chr22	25423531	25423801	270	1.50717	5	0.000552326
DMR_64	chr1	9298817	9299979	1162	-1.2738	6	0.000567646
DMR_57	chr14	56777076	56777525	449	1.12472	7	0.000571677
DMR_106	chr4	174912071	174912278	207	1.49906	5	0.00057329
DMR_107	chr3	3151679	3152038	359	1.49599	5	0.000585385
DMR_140	chr10	123495675	123496392	717	1.88287	4	0.000586997
DMR_66	chr18	3219966	3220643	677	1.26326	6	0.000594254
DMR_63	chr4	40192546	40193301	755	-1.09695	7	0.000667629
DMR_58	chr2	241807539	241808595	1056	0.999199	8	0.000670048
DMR_159	chr2	151343046	151343582	536	1.83509	4	0.000670854
DMR_47	chr6	33771787	33772694	907	-0.91166	9	0.000677305
DMR_160	chr7	55256469	55256767	298	1.82906	4	0.000685368
DMR_206	chr8	89339080	89339473	393	2.57141	3	0.000691818
DMR_65	chr8	107782373	107782938	565	1.08863	7	0.000710364
DMR_60	chr4	111540992	111542825	1833	0.988054	8	0.000723265
DMR_120	chr6	169026352	169027033	681	-1.43674	5	0.000728909
DMR_164	chr17	768075	768395	320	-1.79765	4	0.000731328
DMR_169	chr5	156773546	156773873	327	-1.78341	4	0.000749873
DMR_71	chr1	27240319	27240812	493	1.06322	7	0.000829698
DMR_73	chr6	36209676	36211096	1420	-1.05706	7	0.000859532
DMR_253	chr3	39233997	39234148	151	2.37464	3	0.000871627
DMR_254	chr12	56473408	56473559	151	2.34657	3	0.000911942
DMR_128	chr7	100881986	100882286	300	-1.37498	5	0.000941776
DMR_76	chr5	153864967	153866216	1249	-1.04163	7	0.000963546
DMR_56	chr2	44065550	44066206	656	0.575537	13	0.000965159
DMR_255	chr3	193965266	193965305	39	-2.30714	3	0.000969997
DMR_192	chr6	152085247	152085641	394	1.64369	4	0.00104498
DMR_68	chr22	31276325	31278089	1764	0.78234	10	0.00106837
DMR_79	chr11	2846932	2847778	846	-1.02576	7	0.00107401
DMR_137	chr17	33474058	33475031	973	1.33455	5	0.00108046
DMR_59	chr14	96721588	96722511	923	-0.846029	9	0.00113368
DMR_85	chr6	138725556	138726707	1151	1.142	6	0.00113448
DMR_74	chr8	87081553	87083025	1472	0.706832	11	0.00117158
DMR_156	chr7	100180113	100181409	1296	1.31655	5	0.00117883
DMR_72	chr16	4838377	4839080	703	0.769735	10	0.00118045
DMR_88	chr10	75415704	75416206	502	1.12741	6	0.00122076
DMR_292	chr5	156485233	156485931	698	-2.13808	3	0.0012256
DMR_157	chr2	16189539	16190615	1076	1.30084	5	0.00125059
DMR_219	chr14	85995655	85996101	446	1.58203	4	0.00125543
DMR_604	chr18	53069194	53069194	0	3.56786	1	0.0013151
DMR_62	chr12	122018770	122019525	755	0.82594	9	0.00133042
DMR_626	chr1	17866039	17866055	16	3.08245	2	0.00134493
DMR_317	chr2	118770542	118771338	796	2.06835	3	0.00136509
DMR_161	chr2	242749271	242749789	518	-1.28122	5	0.00137477
DMR_162	chr9	131799208	131799500	292	-1.27886	5	0.00138847
DMR_98	chr17	57917974	57918682	708	1.09648	6	0.00142315
DMR_86	chr3	29322474	29323182	708	-0.983188	7	0.00142798
DMR_223	chr11	122238633	122238873	240	-1.53346	4	0.00146427
DMR_224	chr8	96146902	96147221	319	1.52905	4	0.00148443
DMR_99	chr4	8073737	8073959	222	-1.08883	6	0.00149168
DMR_744	chr8	74330903	74331668	765	2.95055	2	0.001507
DMR_739	chr2	182521222	182521222	0	3.3621	1	0.00152555
DMR_102	chr11	85374547	85375153	606	1.08348	6	0.00154651
DMR_337	chr11	119292737	119292885	148	1.9895	3	0.00156909
DMR_75	chr11	2323056	2324401	1345	0.558006	12	0.00159409
DMR_69	chr1	144994826	144995889	1063	0.799279	9	0.00160537
DMR_70	chr19	58545149	58545837	688	0.79822	9	0.00161827
DMR_89	chr10	95516861	95517562	701	-0.96256	7	0.00163682
DMR_742	chr1	41329406	41329406	0	3.27452	1	0.00163763
DMR_90	chr7	86271778	86273091	1313	0.962462	7	0.00163843
DMR_91	chr14	99988776	99989464	688	-0.961065	7	0.00165456
DMR_109	chr2	96931853	96932024	171	-1.06876	6	0.00166665
DMR_80	chr16	49311698	49312560	862	0.871264	8	0.00166907
DMR_81	chr14	42074221	42075664	1443	0.869787	8	0.00168278
DMR_338	chr12	25101306	25101838	532	-1.94836	3	0.00170133
DMR_179	chr16	4103161	4103533	372	1.23184	5	0.00170213
DMR_180	chr2	239047245	239047774	529	1.22776	5	0.00172793
DMR_110	chr8	23711589	23712052	463	-1.06022	6	0.00174325
DMR_181	chr2	223916639	223916912	273	-1.2248	5	0.0017497
DMR_83	chr8	13372119	13373141	1022	-0.862492	8	0.00177793
DMR_182	chr11	46721921	46722285	364	1.22186	5	0.00178115
DMR_876	chr10	111767864	111767867	3	2.75547	2	0.00183356
DMR_84	chr13	53425257	53426826	1569	0.85806	8	0.00183517
DMR_118	chr5	134365728	134366914	1186	1.05281	6	0.00183517
DMR_77	chr12	123011730	123012351	621	0.773188	9	0.00192548
DMR_125	chr14	88460078	88461489	1411	1.04257	6	0.00196176
DMR_126	chr17	8647944	8648562	618	-1.03942	6	0.00199079
DMR_251	chr17	81041756	81042023	267	-1.43875	4	0.00200208
DMR_360	chr16	89164953	89165300	347	1.85694	3	0.00202385
DMR_361	chr9	20623392	20623705	313	1.85022	3	0.0020424
DMR_87	chr19	14138639	14138994	355	0.836653	8	0.00211013
DMR_191	chr11	62559713	62559977	264	1.18649	5	0.00211496
DMR_953	chr9	139872871	139873127	256	-2.58006	2	0.00217302
DMR_103	chr6	36812147	36812436	289	0.917047	7	0.00218028
DMR_863	chr7	100729154	100729154	0	2.95147	1	0.00218431
DMR_193	chr11	46383031	46383924	893	1.17801	5	0.0021956
DMR_362	chr9	91925643	91925885	242	-1.81813	3	0.00220043
DMR_194	chr1	86861147	86861795	648	1.17538	5	0.00221414
DMR_256	chr12	51784414	51784644	230	-1.40316	4	0.00224801
DMR_954	chr20	44461113	44461421	308	2.54622	2	0.00225688
DMR_864	chr11	92578761	92578761	0	-2.92148	1	0.0022593
DMR_130	chr20	33880530	33881762	1232	1.01751	6	0.0022601
DMR_195	chr11	66085250	66085958	708	-1.16198	5	0.00236976
DMR_363	chr5	150018831	150019123	292	-1.76964	3	0.00242378
DMR_104	chr11	129872515	129872845	330	0.901898	7	0.00242943
DMR_265	chr2	160472940	160473325	385	1.37946	4	0.00245281
DMR_266	chr1	3050958	3051925	967	1.37794	4	0.0024641
DMR_955	chr2	113733884	113734215	331	2.46361	2	0.00246652
DMR_108	chr21	43135854	43136563	709	0.899063	7	0.002477
DMR_92	chr12	14956526	14957520	994	0.812966	8	0.00249958
DMR_276	chr10	23481389	23481776	387	-1.37011	4	0.00252699
DMR_277	chr1	100643710	100643930	220	1.3632	4	0.00258666
DMR_278	chr12	53715584	53715787	203	-1.36245	4	0.00259472
DMR_202	chr16	88753010	88753945	935	1.1425	5	0.00259956
DMR_112	chr5	95767550	95768016	466	0.891623	7	0.00260037
DMR_279	chr4	1052138	1052372	234	1.35781	4	0.00263181
DMR_96	chr3	197676815	197677655	840	0.568973	11	0.00263262
DMR_113	chr1	43290363	43291390	1027	0.889173	7	0.00263907
DMR_95	chr14	100203730	100204258	528	0.80368	8	0.002656
DMR_207	chr11	108408907	108409365	458	-1.13568	5	0.00267938
DMR_367	chr7	100482600	100482725	125	1.72656	3	0.00268019
DMR_285	chr3	160166748	160167317	569	1.35073	4	0.00269712
DMR_974	chr6	52226554	52226554	0	2.7462	1	0.00270277
DMR_286	chr1	155197152	155197384	232	1.34328	4	0.00276727
DMR_381	chr8	142189535	142189600	65	1.70963	3	0.00278824
DMR_382	chr3	71353994	71354056	62	1.70663	3	0.00281001
DMR_383	chr3	10334546	10334743	197	1.70557	3	0.00281726
DMR_208	chr20	45946271	45947226	955	-1.1149	5	0.00296563
DMR_407	chr2	181846570	181846658	88	1.67931	3	0.00296643
DMR_297	chr13	96296844	96296997	153	1.31473	4	0.00306238
DMR_298	chr5	14440757	14441074	317	-1.31085	4	0.00310351
DMR_339	chr2	23840537	23840763	226	-1.30757	4	0.00313979
DMR_209	chr13	111281129	111281479	350	-1.09929	5	0.00317446
DMR_100	chr21	35897663	35899082	1419	-0.704338	9	0.0031922
DMR_135	chr4	184908582	184909018	436	-0.859632	7	0.00321962
DMR_136	chr5	2753852	2754240	388	0.857562	7	0.00326316
DMR_210	chr13	113776917	113777160	243	1.09264	5	0.00327364
DMR_956	chr1	206807818	206807879	61	2.22886	2	0.0033075
DMR_341	chr7	1329016	1329467	451	-1.29117	4	0.00332444
DMR_957	chr20	50720731	50720908	177	-2.21284	2	0.00337282
DMR_163	chr4	3250690	3250921	231	0.951722	6	0.00337523
DMR_414	chr8	17353907	17354128	221	1.61941	3	0.00343893
DMR_415	chr10	131811605	131811642	37	-1.61869	3	0.00344538
DMR_364	chr4	122137613	122138087	474	-1.27515	4	0.00353327
DMR_1035	chr2	200320455	200320455	0	-2.49198	1	0.00354053
DMR_416	chr1	119535928	119536288	360	-1.60562	3	0.00356069
DMR_111	chr7	27169136	27169740	604	-0.75983	8	0.00359617
DMR_365	chr7	129844923	129845340	417	1.26986	4	0.00360826
DMR_165	chr4	159593054	159593240	186	0.938458	6	0.00364696
DMR_1044	chr7	2565575	2565575	0	2.46146	1	0.00367438
DMR_432	chr11	64645556	64645847	291	-1.58841	3	0.00371066
DMR_166	chr2	170219220	170220063	843	0.932588	6	0.00378
DMR_167	chr1	223316927	223317548	621	0.93244	6	0.00378404
DMR_138	chr9	27108915	27109492	577	-0.833725	7	0.0038179
DMR_1081	chr19	40863657	40863657	0	2.42581	1	0.00383967
DMR_139	chr6	27113794	27114864	1070	0.831708	7	0.00386547
DMR_115	chr4	186732926	186733331	405	0.746194	8	0.00395175
DMR_116	chr11	47598175	47599391	1216	-0.744446	8	0.00401787
DMR_1075	chr11	9780844	9781130	286	2.0906	2	0.00401867
DMR_117	chr2	17996416	17998337	1921	-0.744039	8	0.00403561
DMR_1087	chr5	89825908	89825908	0	2.37662	1	0.00408479
DMR_225	chr22	17956453	17956641	188	1.0497	5	0.00408802
DMR_1076	chr3	101405211	101405397	186	2.07008	2	0.00412914
DMR_433	chr9	32551527	32551764	237	1.54477	3	0.00416945
DMR_168	chr16	81254031	81254407	376	0.915542	6	0.00417107
DMR_114	chr1	90097496	90098371	875	0.664512	9	0.00417429
DMR_384	chr3	15839498	15839734	236	1.22972	4	0.00419365
DMR_1077	chr4	90033921	90033974	53	2.05657	2	0.00420735
DMR_143	chr1	45105329	45107692	2363	0.817808	7	0.00424767
DMR_170	chr13	45011353	45011500	147	-0.912668	6	0.00425089
DMR_121	chr6	26123736	26124504	768	0.661662	9	0.0042517
DMR_1078	chr3	11759992	11760003	11	2.0501	2	0.0042517
DMR_385	chr12	122356390	122356598	208	1.22501	4	0.00427266
DMR_226	chr12	53497074	53497306	232	1.03968	5	0.00431298
DMR_1079	chr3	128398171	128398685	514	-2.03773	2	0.00433717
DMR_171	chr1	12538341	12538678	337	-0.90874	6	0.00434684
DMR_144	chr11	111782607	111783355	748	0.813751	7	0.00436297
DMR_145	chr10	134566915	134567759	844	0.812576	7	0.00440571
DMR_386	chr16	524655	524912	257	1.21689	4	0.00441377
DMR_172	chr4	95972614	95972790	176	0.90509	6	0.00443635
DMR_146	chr12	13132534	13133131	597	-0.810792	7	0.00444844
DMR_227	chr2	114646429	114647236	807	1.0321	5	0.00447666
DMR_1123	chr20	58513509	58513509	0	2.30418	1	0.0044823
DMR_387	chr2	27665128	27665150	22	1.2123	4	0.00451133
DMR_1080	chr11	84431918	84431970	52	2.00969	2	0.00452907
DMR_122	chr16	89042948	89043707	759	0.727003	8	0.00453955
DMR_176	chr1	16330404	16330853	449	0.900733	6	0.00456536
DMR_1129	chr6	30747276	30747276	0	-2.28219	1	0.00461293
DMR_445	chr4	81951446	81951487	41	1.50704	3	0.00461535
DMR_119	chr10	106013813	106014410	597	0.534098	10	0.00465566
DMR_177	chr1	151693199	151693847	648	0.89698	6	0.00467018
DMR_388	chr7	35298642	35299217	575	-1.20327	4	0.0046984
DMR_228	chr3	21792857	21792991	134	1.01937	5	0.00476048
DMR_446	chr13	53173507	53174042	535	-1.48916	3	0.00483305
DMR_123	chr13	46961656	46961947	291	0.640536	9	0.00483547
DMR_408	chr5	71803508	71803938	430	-1.18915	4	0.00497093
DMR_147	chr5	96518721	96519229	508	0.789523	7	0.00508865
DMR_409	chr6	108572926	108573461	535	-1.18047	4	0.00512978
DMR_452	chr16	4290611	4290814	203	1.46765	3	0.00514026
DMR_187	chr17	46659939	46661340	1401	-0.880159	6	0.00514913
DMR_236	chr6	108145374	108145777	403	-1.00353	5	0.0051709
DMR_1633	chr2	172749963	172749963	0	2.20298	1	0.00517251
DMR_453	chr2	27505196	27505530	334	1.4645	3	0.00517735
DMR_1433	chr12	62998134	62998815	681	1.9261	2	0.00518541
DMR_237	chr13	32889861	32890352	491	-1.00262	5	0.00519751
DMR_454	chr12	57633980	57634469	489	-1.45994	3	0.00523137
DMR_1634	chr10	123778187	123778187	0	-2.19461	1	0.00524427
DMR_1434	chr6	34524337	34524597	260	-1.91714	2	0.00526524
DMR_188	chr6	30113978	30115028	1050	-0.876769	6	0.00526604
DMR_1435	chr6	24584188	24584275	87	1.91521	2	0.00527572
DMR_238	chr3	114343654	114344019	365	-0.999025	5	0.00529023
DMR_410	chr9	4678949	4679058	109	1.17223	4	0.00531039
DMR_411	chr14	66972956	66973431	475	1.17172	4	0.00531604
DMR_1436	chr3	195621788	195622281	493	-1.90428	2	0.00537167
DMR_1635	chr11	126414507	126414507	0	2.1675	1	0.00545392
DMR_412	chr14	102782525	102783408	883	-1.1642	4	0.00548375
DMR_127	chr19	12444273	12444645	372	0.697613	8	0.00552245
DMR_413	chr2	23747197	23747374	177	-1.16175	4	0.00554261
DMR_149	chr12	86229804	86230675	871	-0.775211	7	0.00559986
DMR_196	chr15	74501317	74501771	454	-0.867482	6	0.00559986
DMR_502	chr16	87756170	87757033	863	1.43485	3	0.00562808
DMR_503	chr5	82766884	82767042	158	1.43469	3	0.00562969
DMR_1636	chr9	2158492	2158492	0	2.13784	1	0.00572968
DMR_1637	chr10	30725362	30725362	0	2.13603	1	0.00573935
DMR_504	chr4	57524669	57524770	101	-1.4283	3	0.00577241
DMR_1437	chr9	86594803	86594889	86	-1.86216	2	0.00580466
DMR_197	chr10	3824373	3825031	658	-0.860981	6	0.0058095
DMR_1438	chr8	48651635	48651652	17	1.8621	2	0.0058095
DMR_1638	chr10	120839407	120839407	0	-2.12401	1	0.0058345
DMR_424	chr17	19551345	19551663	318	-1.14782	4	0.00584659
DMR_131	chr3	12800802	12801712	910	0.688145	8	0.00586675
DMR_522	chr16	68298978	68299128	150	1.42065	3	0.005899
DMR_523	chr16	55090946	55091198	252	-1.42056	3	0.005899
DMR_198	chr20	19866974	19867423	449	0.858149	6	0.00590626
DMR_257	chr11	7593792	7595925	2133	-0.977008	5	0.0059111
DMR_258	chr17	951726	952254	528	-0.976613	5	0.00591835
DMR_524	chr4	91049533	91049728	195	1.41754	3	0.00594899
DMR_259	chr10	35104582	35105401	819	0.973805	5	0.00601914
DMR_260	chr6	474297	475074	777	0.971715	5	0.00607075
DMR_1639	chr1	178063828	178063828	0	2.09812	1	0.00608607
DMR_129	chr16	809972	810702	730	-0.59553	9	0.00609816
DMR_203	chr15	85523513	85523627	114	-0.851089	6	0.00613848
DMR_261	chr4	40194123	40194771	648	-0.96751	5	0.00622314
DMR_262	chr15	93447817	93448465	648	0.96628	5	0.00625781
DMR_132	chr12	371916	372259	343	-0.676931	8	0.00627394
DMR_1627	chr10	98378897	98379072	175	1.81355	2	0.00632635
DMR_425	chr2	106054990	106055153	163	1.12734	4	0.00640375
DMR_525	chr3	113557658	113557932	274	1.39186	3	0.00642714
DMR_153	chr10	63661280	63661686	406	0.755349	7	0.00643359
DMR_526	chr8	20040654	20040892	238	-1.39068	3	0.00645455
DMR_426	chr2	45395666	45395956	290	-1.12344	4	0.00649729
DMR_264	chr5	90576428	90576987	559	-0.959184	5	0.00651664
DMR_133	chr2	174220200	174222237	2037	-0.668816	8	0.00662146
DMR_1628	chr4	48019347	48019555	208	1.78717	2	0.00665452
DMR_154	chr10	94002719	94003210	491	0.748475	7	0.00672306
DMR_527	chr8	134262101	134262768	667	1.37821	3	0.00672386
DMR_1629	chr8	144098098	144098507	409	1.77892	2	0.00676418
DMR_427	chr14	100847897	100848334	437	1.11281	4	0.00677708
DMR_1630	chr22	20008608	20008614	6	1.77615	2	0.00678917
DMR_158	chr17	76975944	76976357	413	-0.746323	7	0.00681578
DMR_528	chr13	24144257	24144486	229	-1.36965	3	0.00688351
DMR_529	chr6	79577640	79577801	161	-1.36873	3	0.00690689
DMR_428	chr6	99289733	99290483	750	1.10182	4	0.00711331
DMR_429	chr2	206546299	206546540	241	1.10068	4	0.0071504
DMR_141	chr6	27100556	27100831	275	0.654743	8	0.00719072
DMR_430	chr3	101292669	101292755	86	1.09884	4	0.00719394
DMR_530	chr12	57472074	57472396	322	1.35164	3	0.00729231
DMR_1631	chr20	60697705	60697728	23	1.73863	2	0.00730844
DMR_531	chr20	21284349	21284574	225	1.34962	3	0.00733747
DMR_173	chr17	76125064	76126301	1237	0.734929	7	0.00735037
DMR_220	chr6	26157673	26158315	642	0.820542	6	0.00741326
DMR_142	chr3	72149324	72149807	483	0.650033	8	0.00742052
DMR_1640	chr20	23012907	23012907	0	1.97123	1	0.00747454
DMR_221	chr17	46622817	46623937	1120	-0.818924	6	0.00747857
DMR_532	chr2	191184766	191184902	136	-1.34258	3	0.00748099
DMR_1632	chr15	63333476	63333555	79	1.72174	2	0.0075334
DMR_533	chr3	9922091	9922257	166	-1.33917	3	0.00755437
DMR_1641	chr11	64795449	64795449	0	1.96479	1	0.00755437
DMR_1642	chr14	23775746	23775746	0	1.96108	1	0.00761484
DMR_269	chr3	184347154	184348177	1023	0.92962	5	0.00762452
DMR_229	chr4	77723057	77723800	743	-0.812031	6	0.00780271
DMR_534	chr6	78175955	78176135	180	1.32674	3	0.00782448
DMR_174	chr5	52776201	52776694	493	0.724149	7	0.00789705
DMR_148	chr3	101546486	101546859	373	0.638652	8	0.00790995
DMR_175	chr5	102089184	102090458	1274	0.723752	7	0.00791237
DMR_535	chr19	55669059	55669189	130	1.32286	3	0.00793575
DMR_271	chr1	201346994	201347550	556	0.921233	5	0.00797123
DMR_1648	chr17	79996736	79996924	188	-1.69145	2	0.00797123
DMR_230	chr10	131761150	131761302	152	0.806716	6	0.0080567
DMR_231	chr10	134956411	134957290	879	0.806583	6	0.00806396
DMR_536	chr16	50188019	50189512	1493	-1.31579	3	0.00811959
DMR_434	chr14	64679950	64680440	490	-1.07097	4	0.00812604
DMR_178	chr20	55836676	55839008	2332	-0.719553	7	0.00812927
DMR_537	chr1	160179710	160180055	345	1.31272	3	0.00821393
DMR_232	chr20	36712026	36713070	1044	0.800324	6	0.0083752
DMR_435	chr13	72441676	72441748	72	1.06167	4	0.00844857
DMR_1643	chr12	117471700	117471700	0	1.90248	1	0.00846469
DMR_544	chr2	162094118	162094836	718	1.3016	3	0.00851953
DMR_545	chr17	75449911	75451669	1758	1.29711	3	0.00863321
DMR_1644	chr20	52228029	52228029	0	1.89075	1	0.00864773
DMR_1649	chr5	176327557	176327783	226	1.6513	2	0.00866627
DMR_272	chr1	177938408	177939282	874	-0.905415	5	0.00869772
DMR_436	chr7	10979244	10979586	342	1.05552	4	0.00870175
DMR_183	chr1	44887933	44889689	1756	-0.708186	7	0.00870336
DMR_1645	chr11	18062359	18062359	0	-1.88596	1	0.00872272
DMR_546	chr22	39408785	39409296	511	-1.29322	3	0.00873884
DMR_437	chr11	93474120	93474517	397	1.05363	4	0.00876223
DMR_1646	chr11	10771440	10771440	0	1.88399	1	0.00876384
DMR_547	chr19	54401945	54402030	85	-1.29163	3	0.00877674
DMR_184	chr18	29598128	29598437	309	0.705409	7	0.00884689
DMR_273	chr5	1834527	1835328	801	0.902159	5	0.00885737
DMR_1650	chr3	141206694	141206903	209	1.64147	2	0.00886302
DMR_274	chr8	141856401	141857818	1417	0.901567	5	0.00888962
DMR_1651	chr2	205410786	205410909	123	-1.63962	2	0.00889366
DMR_548	chr7	100239172	100239188	16	1.28656	3	0.00893236
DMR_1652	chr10	122739390	122739544	154	-1.63612	2	0.00894042
DMR_1647	chr5	122427347	122427347	0	-1.87013	1	0.00897832
DMR_1902	chr16	30799283	30799283	0	1.86732	1	0.0090267
DMR_549	chr1	70876367	70876492	125	1.28236	3	0.00905814
DMR_438	chr14	51706706	51706820	114	1.04273	4	0.00922505
DMR_1653	chr7	113723786	113724153	367	-1.61829	2	0.00928633
DMR_440	chr5	172664082	172664995	913	1.0392	4	0.00936858
DMR_150	chr14	69262995	69263504	509	-0.605867	8	0.0093976
DMR_441	chr10	121632322	121632640	318	-1.03837	4	0.00940244
DMR_442	chr3	182817479	182817626	147	1.03782	4	0.00943066
DMR_1919	chr3	141031715	141031715	0	1.84371	1	0.0094484
DMR_275	chr6	27215328	27215509	181	0.889546	5	0.00947985
DMR_550	chr11	6291879	6291951	72	1.26573	3	0.00952339
DMR_443	chr12	107168846	107168907	61	-1.03556	4	0.0095379
DMR_444	chr9	103191667	103191817	150	-1.03487	4	0.00956693
DMR_151	chr11	113143664	113144592	928	0.600073	8	0.00963708
DMR_233	chr4	54974886	54975894	1008	-0.777961	6	0.00963708
DMR_551	chr14	101535084	101535361	277	1.26228	3	0.00964191
DMR_185	chr11	63655874	63656342	468	-0.691458	7	0.00968707
DMR_447	chr7	2803996	2804166	170	-1.02472	4	0.0100104
DMR_1943	chr5	133749006	133749006	0	1.81325	1	0.0100225
DMR_186	chr20	23066944	23067159	215	0.685448	7	0.0100249
DMR_448	chr15	42212304	42213760	1456	1.02107	4	0.0101628
DMR_189	chr3	186857389	186857593	204	0.682713	7	0.0101773
DMR_190	chr11	124767720	124768015	295	0.682623	7	0.0101846
DMR_281	chr15	67439412	67440222	810	-0.876496	5	0.0102015
DMR_282	chr17	16884621	16884874	253	0.876163	5	0.0102152
DMR_199	chr8	67038980	67040331	1351	0.681607	7	0.0102539
DMR_1654	chr14	22974144	22974297	153	1.5732	2	0.0102587
DMR_200	chr8	11666492	11666810	318	0.68091	7	0.0102902
DMR_152	chr6	100050480	100051116	636	-0.584252	8	0.0103071
DMR_552	chr1	150229143	150229443	300	1.24178	3	0.0103128
DMR_1950	chr20	50794730	50794730	0	-1.7984	1	0.0103273
DMR_1655	chr8	22550720	22550797	77	1.56989	2	0.010341
DMR_239	chr5	108082959	108083695	736	0.767113	6	0.0103555
DMR_284	chr17	80273242	80273969	727	0.873714	5	0.0103749
DMR_240	chr19	1356150	1356315	165	-0.76685	6	0.0103805
DMR_1656	chr6	75995143	75995714	571	1.56463	2	0.0104708
DMR_449	chr5	16508920	16509123	203	1.01421	4	0.010474
DMR_1657	chr12	3982140	3982353	213	1.5568	2	0.0106426
DMR_455	chr2	55843772	55844294	522	1.01004	4	0.0106667
DMR_456	chr10	82297173	82297793	620	1.00918	4	0.0107135
DMR_1962	chr7	69065351	69065351	0	-1.77715	1	0.0107538
DMR_1963	chr16	85774886	85774886	0	-1.77672	1	0.0107627
DMR_201	chr11	44326260	44328154	1894	0.673364	7	0.01077
DMR_248	chr13	92001959	92003418	1459	0.76093	6	0.0107716
DMR_249	chr11	108422663	108423124	461	0.760796	6	0.0107837
DMR_250	chr7	27179800	27181418	1618	0.760487	6	0.0108038
DMR_576	chr8	65492792	65492936	144	1.22714	3	0.0108433
DMR_457	chr10	132284189	132284393	204	1.0059	4	0.010882
DMR_458	chr1	3115309	3115644	335	1.00354	4	0.011011
DMR_252	chr7	1022643	1022841	198	-0.757333	6	0.0110159
DMR_459	chr2	86095308	86096120	812	1.00256	4	0.0110667
DMR_460	chr14	85859699	85860190	491	1.00238	4	0.0110788
DMR_461	chr17	18853473	18854560	1087	1.00177	4	0.0111142
DMR_1658	chr10	127569905	127569973	68	1.53365	2	0.0112255
DMR_577	chr11	46143833	46143993	160	1.21591	3	0.011286
DMR_263	chr5	191486	191628	142	0.752771	6	0.0113053
DMR_1659	chr14	74707911	74708313	402	1.52948	2	0.0113142
DMR_288	chr1	76251867	76252291	424	0.857914	5	0.0113158
DMR_578	chr14	23525003	23525372	369	-1.21471	3	0.0113328
DMR_1660	chr8	145581686	145581783	97	1.52745	2	0.011361
DMR_289	chr16	72981203	72982116	913	-0.855697	5	0.0114529
DMR_290	chr3	141748650	141748884	234	0.855632	5	0.0114553
DMR_616	chr9	21975243	21975305	62	1.21112	3	0.0114876
DMR_291	chr11	84028334	84028582	248	0.854226	5	0.0115392
DMR_1661	chr4	1595294	1595515	221	1.52038	2	0.011544
DMR_293	chr11	47789627	47790209	582	0.853569	5	0.0115827
DMR_479	chr20	3661910	3662724	814	-0.991776	4	0.0115956
DMR_1997	chr17	34134865	34134865	0	1.73864	1	0.0116085
DMR_267	chr22	46646366	46646564	198	0.748665	6	0.0116117
DMR_617	chr2	219574506	219574845	339	-1.20761	3	0.0116375
DMR_618	chr11	116699356	116699649	293	1.2071	3	0.0116569
DMR_295	chr16	69958626	69958964	338	-0.851179	5	0.0117408
DMR_2003	chr10	50508713	50508713	0	1.73217	1	0.0117617
DMR_2004	chr12	122240719	122240719	0	-1.73196	1	0.0117649
DMR_2005	chr2	198668185	198668185	0	1.73159	1	0.011773
DMR_296	chr4	185569742	185569962	220	0.850186	5	0.0117988
DMR_619	chr15	65596744	65596994	250	1.20259	3	0.0118601
DMR_1662	chr18	23807070	23807285	215	-1.50905	2	0.0118722
DMR_480	chr17	37821447	37821661	214	0.98676	4	0.0119012
DMR_620	chr3	156807520	156807650	130	1.20162	3	0.011902
DMR_268	chr17	46657504	46659019	1515	-0.743983	6	0.011952
DMR_621	chr13	100624855	100624965	110	-1.19977	3	0.0119818
DMR_622	chr5	125695687	125695774	87	1.1985	3	0.0120262
DMR_623	chr2	240239988	240240189	201	1.19715	3	0.012077
DMR_481	chr19	42873824	42873953	129	0.981667	4	0.0121616
DMR_624	chr15	59665285	59665646	361	1.19438	3	0.0121899
DMR_270	chr2	242842459	242843353	894	0.740101	6	0.0122479
DMR_625	chr6	10748810	10750017	1207	1.19236	3	0.0122737
DMR_482	chr12	92535822	92536650	828	0.979285	4	0.0122939
DMR_627	chr4	71569793	71570148	355	1.19055	3	0.01236
DMR_1663	chr8	67419572	67419936	364	-1.48992	2	0.0124052
DMR_318	chr1	226251003	226251595	592	0.840358	5	0.0124584
DMR_204	chr14	61201094	61201437	343	0.647793	7	0.0124689
DMR_628	chr20	48533123	48533196	73	1.18738	3	0.0125043
DMR_205	chr6	11232665	11233125	460	0.646457	7	0.0125721
DMR_319	chr16	19896246	19896346	100	-0.838448	5	0.0125882
DMR_483	chr2	198541731	198542050	319	0.974331	4	0.0126051
DMR_1664	chr2	73613587	73613845	258	1.48328	2	0.012614
DMR_320	chr3	71295335	71295684	349	0.837771	5	0.0126277
DMR_321	chr20	11872561	11873102	541	0.837474	5	0.0126559
DMR_629	chr5	156570642	156571045	403	1.18383	3	0.0126777
DMR_484	chr2	128408991	128410029	1038	-0.972496	4	0.0126882
DMR_630	chr16	67970749	67970774	25	-1.18308	3	0.0127091
DMR_322	chr12	15375153	15376678	1525	-0.836219	5	0.0127559
DMR_280	chr7	100881007	100881367	360	-0.732753	6	0.0128148
DMR_485	chr7	27134369	27135214	845	-0.9695	4	0.0128833
DMR_342	chr1	53792921	53793156	235	0.834149	5	0.012918
DMR_486	chr6	86353884	86354160	276	0.968127	4	0.0129704
DMR_283	chr17	750241	750848	607	-0.729881	6	0.0130381
DMR_1665	chr13	24144682	24144900	218	1.46929	2	0.013051
DMR_2056	chr1	156050126	156050126	0	-1.6745	1	0.0132792
DMR_631	chr10	48390936	48391314	378	-1.16988	3	0.0132889
DMR_1666	chr3	52720133	52720522	389	1.46014	2	0.0133195
DMR_632	chr5	1836569	1836793	224	1.16918	3	0.0133356
DMR_211	chr6	99873228	99873484	256	0.635086	7	0.0133502
DMR_633	chr15	41953829	41954085	256	1.16836	3	0.0133703
DMR_2062	chr6	110736422	110736422	0	1.66772	1	0.0135001
DMR_343	chr11	61687835	61688133	298	0.826316	5	0.0135179
DMR_1667	chr13	98794353	98794470	117	-1.45306	2	0.0135574
DMR_487	chr17	36105029	36105210	181	0.958102	4	0.0135985
DMR_634	chr14	93502687	93502930	243	1.16328	3	0.013634
DMR_2068	chr21	44883696	44883696	0	-1.66299	1	0.0136477
DMR_212	chr17	29624396	29625878	1482	-0.62977	7	0.0137283
DMR_2071	chr2	163101493	163101493	0	-1.65728	1	0.0138114
DMR_1668	chr1	36620222	36620450	228	1.44583	2	0.0138186
DMR_213	chr1	214157026	214158373	1347	-0.628356	7	0.0138235
DMR_344	chr14	105531855	105532030	175	0.820969	5	0.0139315
DMR_488	chr5	167689454	167689737	283	0.952684	4	0.013938
DMR_1669	chr1	66258046	66258049	3	1.44251	2	0.0139388
DMR_728	chr3	185825565	185826130	565	-1.15624	3	0.0139807
DMR_214	chr15	52970800	52971181	381	0.625018	7	0.0140388
DMR_489	chr17	14628972	14629273	301	0.951024	4	0.0140589
DMR_287	chr16	55542668	55542831	163	-0.717092	6	0.0140694
DMR_215	chr8	62200323	62200689	366	0.622557	7	0.0142242
DMR_729	chr1	207992403	207992548	145	1.15075	3	0.0142419
DMR_490	chr2	48131795	48132411	616	0.947943	4	0.0142766
DMR_345	chr19	45981574	45982164	590	0.816576	5	0.0142798
DMR_730	chr1	65534381	65534742	361	-1.14795	3	0.0143669
DMR_216	chr1	153950472	153950867	395	0.619181	7	0.014483
DMR_346	chr3	156544070	156544136	66	0.813437	5	0.0145266
DMR_505	chr4	130017173	130017530	357	0.944078	4	0.0145508
DMR_506	chr3	151176600	151177604	1004	-0.943953	4	0.0145556
DMR_294	chr14	53418879	53419701	822	0.710877	6	0.0145911
DMR_347	chr17	78195418	78196328	910	0.812016	5	0.0146491
DMR_2102	chr8	37887424	37887424	0	1.6295	1	0.0146564
DMR_507	chr2	96930398	96930860	462	0.942257	4	0.0146709
DMR_731	chr2	33823673	33824250	577	-1.14225	3	0.0146765
DMR_732	chr1	225616299	225616590	291	-1.142	3	0.0146903
DMR_217	chr6	31682787	31683352	565	-0.616201	7	0.0147136
DMR_1670	chr5	79379309	79379640	331	1.42139	2	0.0147193
DMR_348	chr7	29519323	29520118	795	-0.810793	5	0.0147451
DMR_508	chr1	245316446	245316885	439	0.941341	4	0.0147531
DMR_509	chr2	201674914	201675911	997	0.941283	4	0.0147556
DMR_1671	chr4	23890206	23890254	48	1.41758	2	0.014841
DMR_2106	chr7	37023984	37023984	0	1.62388	1	0.0148612
DMR_733	chr7	80231483	80231599	116	1.13741	3	0.0149604
DMR_2110	chr4	152330774	152330774	0	1.62069	1	0.014966
DMR_299	chr2	202122587	202122832	245	-0.706603	6	0.0149854
DMR_734	chr7	2046821	2046963	142	1.13654	3	0.0149991
DMR_735	chr11	31837104	31837144	40	1.13643	3	0.0150023
DMR_510	chr19	31845176	31847167	1991	0.937463	4	0.0150031
DMR_2111	chr1	26552116	26552116	0	-1.61918	1	0.0150176
DMR_349	chr11	3242765	3243281	516	-0.806978	5	0.0150668
DMR_218	chr12	133412002	133413532	1530	0.610673	7	0.0151216
DMR_350	chr1	6580167	6580387	220	-0.805902	5	0.0151636
DMR_511	chr5	946277	946556	279	-0.934496	4	0.0152111
DMR_351	chr8	65291287	65291542	255	-0.803961	5	0.0153466
DMR_300	chr3	195538730	195539033	303	0.702193	6	0.0153555
DMR_301	chr1	95698378	95699037	659	0.701557	6	0.0154103
DMR_2126	chr8	68863603	68863603	0	1.6047	1	0.0155175
DMR_512	chr17	46671635	46672255	620	-0.930371	4	0.0155272
DMR_736	chr4	146859802	146859825	23	1.12766	3	0.0155304
DMR_2128	chr11	75478404	75478404	0	1.60323	1	0.0155595
DMR_1672	chr10	134221503	134221633	130	-1.40002	2	0.0155603
DMR_302	chr18	72917369	72917943	574	0.700035	6	0.0155683
DMR_2129	chr10	13629019	13629019	0	1.60196	1	0.0156038
DMR_2130	chr17	74735058	74735058	0	1.60184	1	0.0156054
DMR_352	chr3	69129635	69129751	116	0.800041	5	0.0156909
DMR_513	chr14	77647955	77648007	52	0.927523	4	0.0157272
DMR_2133	chr7	129934352	129934352	0	-1.59744	1	0.0157433
DMR_2134	chr19	38756382	38756382	0	-1.59735	1	0.0157481
DMR_737	chr14	100843942	100844352	410	1.12254	3	0.0157868
DMR_514	chr8	122654045	122654566	521	0.926474	4	0.0158086
DMR_738	chr20	13765081	13765357	276	-1.1217	3	0.0158328
DMR_222	chr7	99691314	99691644	330	-0.599586	7	0.0158892
DMR_740	chr17	3416252	3416326	74	1.12058	3	0.0159046
DMR_1673	chr8	101321067	101321620	553	1.38985	2	0.0160054
DMR_234	chr15	58356761	58357319	558	-0.595262	7	0.0162094
DMR_520	chr7	121784564	121785331	767	0.920151	4	0.0163263
DMR_521	chr11	124311218	124311550	332	0.920076	4	0.0163303
DMR_235	chr1	111991897	111992173	276	0.592299	7	0.0164109
DMR_303	chr2	16080370	16080760	390	-0.690215	6	0.016548
DMR_741	chr17	34838488	34838641	153	1.10839	3	0.0166069
DMR_745	chr2	38603378	38603476	98	1.10744	3	0.0166665
DMR_304	chr4	86851225	86851425	200	-0.688645	6	0.016706
DMR_305	chr16	54404567	54404959	392	0.687909	6	0.016773
DMR_306	chr9	113342255	113342396	141	0.687899	6	0.016773
DMR_2161	chr17	40914631	40914631	0	-1.56911	1	0.0168431
DMR_746	chr12	27485716	27486485	769	-1.10449	3	0.0168568
DMR_747	chr17	74705404	74705806	402	-1.1039	3	0.0168939
DMR_748	chr7	75608553	75609532	979	1.0994	3	0.01716
DMR_1674	chr12	6603303	6603428	125	-1.3639	2	0.0171842
DMR_2178	chr15	62126456	62126456	0	1.55994	1	0.0172011
DMR_307	chr10	95241944	95242156	212	0.682036	6	0.0173527
DMR_825	chr8	95230489	95231106	617	1.09558	3	0.0174027
DMR_826	chr8	96281885	96282015	130	1.0954	3	0.0174172
DMR_538	chr4	140374159	140374338	179	0.905219	4	0.0175761
DMR_827	chr5	149109878	149110124	246	-1.09235	3	0.0176325
DMR_539	chr10	111970950	111971576	626	0.902981	4	0.0177784
DMR_540	chr21	40816035	40816607	572	0.902912	4	0.0177881
DMR_541	chr19	18315256	18316102	846	-0.902361	4	0.0178381
DMR_308	chr2	228735290	228735790	500	-0.677048	6	0.0178446
DMR_828	chr2	147890920	147891408	488	1.08945	3	0.0178446
DMR_829	chr10	102756762	102756797	35	1.08943	3	0.0178454
DMR_309	chr9	4489544	4490279	735	0.676366	6	0.0179187
DMR_241	chr5	140105405	140105729	324	0.569274	7	0.0179792
DMR_830	chr9	98212951	98213040	89	-1.08632	3	0.0180574
DMR_542	chr10	49482723	49482871	148	0.89951	4	0.0181002
DMR_2199	chr3	18466481	18466481	0	1.53838	1	0.0181244
DMR_242	chr16	89386798	89387369	571	0.565696	7	0.0181727
DMR_543	chr15	70387094	70387303	209	-0.898664	4	0.0181784
DMR_366	chr17	43048761	43050496	1735	-0.774962	5	0.0181897
DMR_1675	chr7	104654900	104654995	95	1.34216	2	0.0182171
DMR_1676	chr11	1976536	1976716	180	-1.34191	2	0.0182276
DMR_1677	chr5	53607611	53607772	161	1.3397	2	0.0183308
DMR_2203	chr17	7609416	7609416	0	1.53317	1	0.0183501
DMR_1678	chr1	65614897	65615281	384	-1.33892	2	0.0183687
DMR_1679	chr7	25164393	25164549	156	1.33866	2	0.01838
DMR_553	chr2	27301195	27301373	178	-0.896072	4	0.0183872
DMR_310	chr3	140770193	140770549	356	0.671554	6	0.0183929
DMR_831	chr7	1782577	1782755	178	1.08183	3	0.018409
DMR_1680	chr3	110790389	110790516	127	-1.33527	2	0.018559
DMR_243	chr1	151042743	151043024	281	0.55935	7	0.0185662
DMR_311	chr6	17282778	17283113	335	0.669666	6	0.0185993
DMR_832	chr7	154861569	154861728	159	1.07872	3	0.018621
DMR_1681	chr7	83824481	83824617	136	-1.33385	2	0.018621
DMR_244	chr17	77018772	77019138	366	0.558389	7	0.0186267
DMR_833	chr16	22102099	22102614	515	1.07766	3	0.018696
DMR_2215	chr10	131908135	131908135	0	1.52301	1	0.018771
DMR_1682	chr2	176866349	176866599	250	1.33021	2	0.018796
DMR_368	chr12	6860346	6861825	1479	0.769359	5	0.0188226
DMR_834	chr2	95691500	95691755	255	-1.0756	3	0.0188307
DMR_1683	chr22	21982391	21982787	396	-1.32818	2	0.0188791
DMR_245	chr1	201979478	201979938	460	0.553033	7	0.0189016
DMR_369	chr3	69914965	69915302	337	0.768324	5	0.0189218
DMR_1684	chr9	131874186	131874946	760	1.32729	2	0.0189282
DMR_312	chr10	98945791	98945892	101	0.665969	6	0.0189573
DMR_2223	chr14	20810759	20810759	0	1.51771	1	0.0189944
DMR_1685	chr1	47690795	47690981	186	1.32492	2	0.0190339
DMR_1686	chr8	65494101	65494451	350	-1.32458	2	0.0190621
DMR_2226	chr14	73959688	73959688	0	1.51511	1	0.0191274
DMR_313	chr15	37391721	37392157	436	0.663982	6	0.0191653
DMR_1687	chr7	42972457	42972593	136	1.32237	2	0.0192161
DMR_1688	chr16	838696	838782	86	1.31923	2	0.0193814
DMR_835	chr2	190448262	190449241	979	-1.06639	3	0.0195048
DMR_2233	chr11	44342177	44342177	0	1.5068	1	0.0195257
DMR_836	chr10	126211811	126212014	203	-1.06577	3	0.0195499
DMR_246	chr3	52804560	52805107	547	0.538561	7	0.0195983
DMR_837	chr4	148401046	148401351	305	1.06479	3	0.0196217
DMR_370	chr3	169899570	169899625	55	0.761596	5	0.0196467
DMR_247	chr5	167913298	167913534	236	0.537189	7	0.0196547
DMR_1689	chr2	88471173	88471292	119	-1.31421	2	0.0196652
DMR_554	chr9	35815189	35815398	209	0.882324	4	0.0197023
DMR_1690	chr2	202672802	202673010	208	-1.31318	2	0.019737
DMR_371	chr10	50507003	50507214	211	0.760573	5	0.0197749
DMR_314	chr15	65689058	65689433	375	-0.657636	6	0.0198289
DMR_1691	chr1	98510182	98510865	683	1.31063	2	0.0198708
DMR_372	chr12	131199936	131200631	695	0.759618	5	0.0198773
DMR_373	chr14	35450111	35451193	1082	-0.75824	5	0.0200418
DMR_2254	chr2	70057052	70057052	0	-1.49535	1	0.0200813
DMR_555	chr4	23891486	23891835	349	0.877889	4	0.020145
DMR_556	chr14	64109064	64109325	261	0.876234	4	0.0203224
DMR_2258	chr6	119399320	119399320	0	-1.49092	1	0.0203304
DMR_557	chr2	206949263	206949648	385	0.875882	4	0.0203522
DMR_1692	chr6	158094798	158094825	27	1.30215	2	0.0203554
DMR_558	chr12	120967237	120967936	699	0.875822	4	0.0203586
DMR_838	chr19	8568648	8569300	652	1.05491	3	0.0203998
DMR_315	chr8	93108011	93109168	1157	0.65207	6	0.0204748
DMR_1693	chr15	99250440	99250482	42	-1.29868	2	0.0205497
DMR_2267	chr8	90915339	90915339	0	1.48615	1	0.0205643
DMR_839	chr6	89789643	89789979	336	-1.05266	3	0.0205788
DMR_840	chr10	105036495	105036645	150	1.05198	3	0.020636
DMR_1694	chr1	230203611	230203783	172	1.29604	2	0.0207078
DMR_2271	chr14	22950395	22950395	0	1.48269	1	0.0207465
DMR_1695	chr7	23511090	23511443	353	-1.29451	2	0.0207997
DMR_2274	chr2	75787820	75787820	0	-1.48105	1	0.0208328
DMR_316	chr2	152830189	152830614	425	-0.647639	6	0.0209561
DMR_559	chr16	8814411	8814755	344	0.87004	4	0.0209795
DMR_841	chr5	56778638	56778686	48	-1.04789	3	0.0209835
DMR_374	chr19	46806404	46806912	508	0.749713	5	0.0210368
DMR_375	chr10	729479	729956	477	-0.748829	5	0.0211279
DMR_376	chr14	81408086	81408461	375	0.748289	5	0.02119
DMR_842	chr8	49532875	49532927	52	-1.04499	3	0.021194
DMR_560	chr16	73093296	73093652	356	0.867853	4	0.0212012
DMR_843	chr17	35305366	35305634	268	1.04444	3	0.0212456
DMR_2288	chr9	109625417	109625417	0	-1.47226	1	0.0213012
DMR_561	chr16	73178242	73178501	259	-0.866839	4	0.0213174
DMR_377	chr9	111776163	111777278	1115	-0.746304	5	0.0214286
DMR_562	chr12	133338719	133339662	943	0.865384	4	0.0214867
DMR_844	chr7	2649920	2650132	212	1.04168	3	0.0214891
DMR_845	chr7	2059921	2060116	195	1.04063	3	0.0215738
DMR_563	chr16	75894736	75894775	39	0.864266	4	0.0215955
DMR_846	chr16	58533808	58533979	171	-1.04021	3	0.0216076
DMR_2299	chr10	95518976	95518976	0	-1.46405	1	0.0217125
DMR_378	chr15	96714359	96714775	416	0.743952	5	0.0217229
DMR_2300	chr10	61666824	61666824	0	1.46295	1	0.0217794
DMR_1696	chr7	33943362	33943437	75	1.2779	2	0.02186
DMR_847	chr18	3602086	3602111	25	-1.03706	3	0.0218923
DMR_564	chr4	146858263	146858930	667	0.861251	4	0.0219035
DMR_848	chr2	3704363	3704530	167	1.03645	3	0.0219503
DMR_849	chr10	31423381	31423673	292	-1.03549	3	0.0220455
DMR_850	chr1	24862381	24863166	785	-1.03336	3	0.0222108
DMR_1697	chr3	185046528	185046594	66	1.27063	2	0.0222978
DMR_1698	chr2	122287957	122288051	94	1.26867	2	0.022393
DMR_565	chr5	153859854	153860476	622	-0.856545	4	0.0224333
DMR_379	chr6	10694632	10694920	288	-0.737456	5	0.022526
DMR_566	chr10	135098391	135099129	738	0.855566	4	0.0225292
DMR_567	chr1	100111713	100111949	236	-0.855193	4	0.022568
DMR_1699	chr7	95027158	95027751	593	-1.2658	2	0.0225817
DMR_2324	chr5	72143731	72143731	0	1.44847	1	0.0225857
DMR_851	chr1	63786083	63786358	275	1.02867	3	0.0226196
DMR_2326	chr12	125347797	125347797	0	1.44726	1	0.0226566
DMR_2327	chr1	184356117	184356117	0	1.44719	1	0.0226631
DMR_852	chr7	55433036	55434080	1044	-1.02797	3	0.0226687
DMR_323	chr19	47287778	47288263	485	-0.632454	6	0.0226881
DMR_324	chr12	4554786	4554971	185	0.632102	6	0.0227341
DMR_2330	chr3	120170646	120170646	0	1.44502	1	0.0227929
DMR_568	chr15	74889327	74889688	361	-0.853123	4	0.0228147
DMR_380	chr17	19290690	19291120	430	-0.734793	5	0.0228477
DMR_569	chr6	3893034	3893350	316	-0.852297	4	0.0229026
DMR_570	chr5	54282332	54283267	935	-0.851817	4	0.0229574
DMR_1700	chr18	21166899	21167098	199	1.25944	2	0.0230711
DMR_1701	chr2	215673456	215673652	196	-1.25943	2	0.0230719
DMR_571	chr2	172950096	172950125	29	-0.850339	4	0.0231332
DMR_853	chr4	8474290	8474861	571	-1.02274	3	0.0231396
DMR_1702	chr6	7910221	7910241	20	1.25717	2	0.023238
DMR_2340	chr15	78287690	78287690	0	1.43755	1	0.0232517
DMR_2343	chr20	32077966	32077966	0	1.43551	1	0.0233686
DMR_325	chr2	169658981	169659182	201	0.625876	6	0.023446
DMR_854	chr16	81678497	81678705	208	1.01885	3	0.0235025
DMR_389	chr13	79169714	79169966	252	-0.730012	5	0.0235113
DMR_855	chr20	45948453	45948853	400	-1.01708	3	0.0236742
DMR_326	chr17	75446431	75446661	230	-0.623956	6	0.0236758
DMR_390	chr1	53662423	53662814	391	-0.727885	5	0.0238282
DMR_1703	chr4	81119460	81119473	13	1.2475	2	0.0238564
DMR_327	chr8	144120399	144120681	282	0.622403	6	0.0238572
DMR_391	chr7	1748597	1748850	253	-0.727423	5	0.0239032
DMR_856	chr9	127961717	127961907	190	-1.01468	3	0.0239169
DMR_572	chr15	74496040	74497361	1321	-0.844066	4	0.0239177
DMR_857	chr8	95908808	95909079	271	1.01448	3	0.0239322
DMR_328	chr16	77224683	77225049	366	0.621644	6	0.0239476
DMR_392	chr9	124048188	124048515	327	0.726834	5	0.0239645
DMR_573	chr4	42659291	42659458	167	0.842888	4	0.0240693
DMR_393	chr5	110408910	110409008	98	0.725993	5	0.0240862
DMR_1704	chr3	112279832	112280086	254	1.24383	2	0.0240943
DMR_2349	chr19	36629608	36629608	0	1.42488	1	0.0241112
DMR_2352	chr7	128828303	128828303	0	-1.42361	1	0.0241935
DMR_394	chr6	131322280	131322683	403	0.724869	5	0.0242306
DMR_574	chr9	78504994	78505312	318	0.840311	4	0.0244096
DMR_1705	chr12	122232196	122232358	162	1.23652	2	0.024616
DMR_395	chr17	53800041	53800484	443	-0.721977	5	0.0246241
DMR_1706	chr1	196577387	196577643	256	1.23584	2	0.0246579
DMR_2365	chr17	71896979	71896979	0	-1.41529	1	0.0247007
DMR_575	chr3	133614304	133614580	276	0.83756	4	0.0247692
DMR_1707	chr16	54209183	54209282	99	-1.23395	2	0.02482
DMR_858	chr12	108955002	108955022	20	-1.00483	3	0.0248482
DMR_859	chr17	46570458	46570606	148	1.00442	3	0.0248974
DMR_1708	chr8	71316769	71316869	100	-1.23221	2	0.0249506
DMR_579	chr7	1884783	1885050	267	0.835559	4	0.0250345
DMR_329	chr10	35894207	35894430	223	0.612489	6	0.0250772
DMR_2375	chr7	16461798	16461798	0	-1.40978	1	0.0250804
DMR_860	chr6	135818446	135818529	83	1.00269	3	0.0250949
DMR_580	chr11	46938492	46938752	260	0.835047	4	0.025099
DMR_861	chr11	116700436	116700556	120	-1.00258	3	0.0251006
DMR_862	chr11	63803358	63803376	18	1.00248	3	0.0251159
DMR_2376	chr6	1522087	1522087	0	1.40908	1	0.0251369
DMR_330	chr6	43027125	43027303	178	0.608805	6	0.025486
DMR_877	chr5	140254845	140255069	224	0.997764	3	0.0255723
DMR_1709	chr8	28558363	28558598	235	-1.22405	2	0.0255941
DMR_581	chr11	93860745	93861839	1094	0.831338	4	0.0256029
DMR_878	chr12	117036703	117036740	37	0.996807	3	0.0257013
DMR_582	chr2	235405122	235405258	136	-0.830455	4	0.0257424
DMR_583	chr2	161126295	161126482	187	0.829962	4	0.0258198
DMR_331	chr19	23945203	23945761	558	0.605569	6	0.0258795
DMR_879	chr20	43590026	43590115	89	0.994973	3	0.0258908
DMR_880	chr17	79225757	79225974	217	0.994962	3	0.0258916
DMR_2396	chr9	16868891	16868891	0	-1.39737	1	0.0259698
DMR_881	chr10	63421873	63422254	381	-0.993607	3	0.0260125
DMR_1710	chr17	38463355	38464162	807	-1.21869	2	0.0260279
DMR_2399	chr1	85516568	85516568	0	-1.39597	1	0.0260649
DMR_1711	chr11	128564106	128564180	74	1.21776	2	0.026102
DMR_332	chr1	1562110	1563001	891	0.603612	6	0.0261182
DMR_396	chr19	35773231	35773328	97	0.710572	5	0.0262246
DMR_584	chr10	90712625	90712748	123	-0.826614	4	0.0262456
DMR_882	chr19	48759158	48759219	61	0.991271	3	0.0262552
DMR_397	chr12	53611399	53612734	1335	-0.710056	5	0.026298
DMR_333	chr7	155089390	155089803	413	0.601749	6	0.0263076
DMR_585	chr17	78735268	78735398	130	-0.825872	4	0.0263512
DMR_1712	chr9	107526487	107526516	29	1.2136	2	0.0264447
DMR_883	chr8	142368264	142368332	68	-0.989543	3	0.0264858
DMR_1713	chr12	16501473	16501534	61	1.2122	2	0.0265455
DMR_398	chr19	49576955	49577303	348	0.707994	5	0.0265971
DMR_884	chr4	39528269	39528473	204	0.988502	3	0.0265987
DMR_1714	chr2	54787135	54787681	546	-1.20969	2	0.0267938
DMR_399	chr14	75229841	75229999	158	0.706352	5	0.0268229
DMR_1715	chr6	99293292	99293644	352	1.2094	2	0.0268277
DMR_885	chr6	34113293	34113570	277	0.986197	3	0.0268696
DMR_2423	chr14	20938565	20938565	0	1.38603	1	0.0268737
DMR_2424	chr2	29336856	29336856	0	1.38568	1	0.0269067
DMR_1716	chr5	57756161	57756187	26	-1.20731	2	0.0269987
DMR_1717	chr9	112886757	112886874	117	1.20571	2	0.0271502
DMR_1718	chr8	42249732	42249921	189	1.20561	2	0.0271567
DMR_2438	chr1	230201582	230201582	0	1.37951	1	0.0273292
DMR_400	chr12	75727243	75728281	1038	0.702032	5	0.0274486
DMR_2440	chr20	61268621	61268621	0	-1.37782	1	0.0274574
DMR_886	chr13	114187973	114188051	78	0.980846	3	0.0274639
DMR_334	chr15	76304531	76304865	334	-0.591726	6	0.0274921
DMR_586	chr1	23886396	23886495	99	0.817658	4	0.027497
DMR_401	chr4	1167239	1167714	475	-0.70148	5	0.0275308
DMR_2442	chr9	100265926	100265926	0	1.37657	1	0.0275494
DMR_887	chr6	12012544	12012554	10	-0.979235	3	0.0276542
DMR_1719	chr11	1292718	1293211	493	1.1996	2	0.0276848
DMR_587	chr17	76227386	76227681	295	-0.816148	4	0.0277122
DMR_888	chr5	1089654	1089753	99	0.977027	3	0.0279138
DMR_588	chr9	99801991	99802039	48	0.814353	4	0.0279517
DMR_1720	chr1	201796836	201797198	362	1.1963	2	0.0279711
DMR_402	chr2	97405809	97405879	70	0.698642	5	0.0279969
DMR_1721	chr11	129940635	129940760	125	1.19512	2	0.0280912
DMR_889	chr17	753974	754463	489	-0.975597	3	0.0280936
DMR_403	chr16	1133074	1133378	304	-0.697699	5	0.0281372
DMR_589	chr3	71633826	71634062	236	0.813082	4	0.0281444
DMR_1722	chr2	158484388	158484692	304	1.19353	2	0.0282299
DMR_590	chr7	1362962	1363437	475	-0.812201	4	0.0282823
DMR_890	chr12	121146593	121146848	255	-0.973868	3	0.0283129
DMR_2466	chr1	184006216	184006216	0	1.36639	1	0.0283525
DMR_891	chr14	95078599	95078743	144	-0.973545	3	0.0283533
DMR_1723	chr2	74215176	74215659	483	1.19208	2	0.0283613
DMR_1724	chr2	48011057	48011201	144	1.19203	2	0.0283613
DMR_591	chr10	77871618	77871675	57	0.811239	4	0.0284242
DMR_892	chr3	49203316	49203530	214	0.972181	3	0.0284718
DMR_1725	chr18	13640835	13641255	420	1.19014	2	0.0285524
DMR_592	chr2	154727925	154728234	309	0.810376	4	0.0285597
DMR_893	chr3	129118327	129118382	55	0.971222	3	0.0285895
DMR_894	chr1	117114781	117115307	526	0.971018	3	0.0286121
DMR_593	chr11	44972971	44973218	247	0.80996	4	0.0286355
DMR_594	chr18	18692221	18692338	117	0.809924	4	0.0286427
DMR_895	chr2	175191045	175191374	329	0.970734	3	0.028654
DMR_595	chr6	112408087	112408422	335	0.809099	4	0.028779
DMR_2478	chr1	205718364	205718364	0	1.36055	1	0.028833
DMR_596	chr1	63988325	63988585	260	0.808647	4	0.0288427
DMR_896	chr11	66644068	66644465	397	0.968684	3	0.028904
DMR_597	chr19	41859159	41859862	703	0.808059	4	0.0289193
DMR_1726	chr12	8756853	8756908	55	1.1859	2	0.0289225
DMR_404	chr9	33001303	33001657	354	0.692466	5	0.0290096
DMR_598	chr10	6220879	6220989	110	0.80723	4	0.029041
DMR_2486	chr7	92861091	92861091	0	-1.35691	1	0.0291144
DMR_897	chr1	203738680	203738799	119	0.966659	3	0.0291475
DMR_335	chr9	131266839	131267365	526	0.576692	6	0.0292096
DMR_898	chr2	175548256	175548447	191	0.965862	3	0.0292523
DMR_336	chr1	156786617	156786723	106	0.575643	6	0.0293104
DMR_2493	chr11	6383752	6383752	0	1.35364	1	0.0293773
DMR_899	chr8	120685787	120686681	894	-0.964732	3	0.0294184
DMR_599	chr2	32581594	32581768	174	-0.804452	4	0.029491
DMR_1727	chr1	6446787	6446795	8	-1.17957	2	0.0295119
DMR_600	chr1	63783403	63783576	173	0.804293	4	0.0295224
DMR_900	chr6	47748653	47748844	191	0.963043	3	0.0296385
DMR_405	chr9	706307	706836	529	0.688195	5	0.0296813
DMR_901	chr1	117602117	117602246	129	-0.962139	3	0.0297345
DMR_902	chr6	118229306	118229732	426	-0.962102	3	0.0297377
DMR_1728	chr7	140179284	140179289	5	-1.17686	2	0.0297393
DMR_2501	chr1	45205796	45205796	0	-1.34793	1	0.0298595
DMR_2502	chr2	111878091	111878091	0	1.34785	1	0.0298675
DMR_1729	chr14	22987097	22987246	149	1.1752	2	0.0298925
DMR_903	chr3	48672262	48672479	217	0.960364	3	0.0299393
DMR_406	chr2	157197892	157198370	478	0.686331	5	0.029978
DMR_904	chr12	124773995	124774078	83	-0.959859	3	0.0300006
DMR_601	chr11	47198757	47198863	106	0.800874	4	0.0300828
DMR_2511	chr6	105400734	105400734	0	-1.34409	1	0.0301659
DMR_2512	chr7	8483374	8483374	0	1.344	1	0.0301715
DMR_905	chr10	133835822	133835927	105	0.958341	3	0.0302102
DMR_906	chr1	163041702	163041800	98	-0.956013	3	0.030519
DMR_1730	chr1	54821853	54821910	57	-1.16798	2	0.0306126
DMR_2536	chr1	24410469	24410469	0	-1.33757	1	0.030715
DMR_2537	chr15	59157857	59157857	0	1.33677	1	0.0307795
DMR_340	chr6	37139433	37140196	763	-0.561462	6	0.0308117
DMR_907	chr3	138553977	138554161	184	-0.953797	3	0.0308295
DMR_417	chr15	78558119	78558513	394	0.681084	5	0.0308327
DMR_908	chr10	24497779	24498095	316	0.953361	3	0.0308972
DMR_909	chr1	55229700	55230057	357	0.953092	3	0.0309383
DMR_2543	chr15	35086352	35086352	0	1.3346	1	0.0309786
DMR_910	chr2	27503813	27504173	360	-0.952645	3	0.0309988
DMR_1731	chr4	186456009	186456103	94	-1.16417	2	0.0310238
DMR_1732	chr18	76746274	76746337	63	1.16318	2	0.0311294
DMR_1733	chr15	79165973	79166157	184	-1.16222	2	0.0312278
DMR_602	chr1	38354007	38354185	178	0.793843	4	0.0312415
DMR_2556	chr12	58335181	58335181	0	-1.33061	1	0.0313068
DMR_418	chr5	135170272	135170726	454	0.677815	5	0.0313528
DMR_911	chr13	30880827	30881096	269	0.949694	3	0.0314197
DMR_2558	chr1	937409	937409	0	-1.32718	1	0.0315955
DMR_2561	chr2	154332333	154332333	0	-1.32648	1	0.0316543
DMR_2562	chr14	70315994	70315994	0	-1.32646	1	0.0316551
DMR_2570	chr7	156401919	156401919	0	1.32492	1	0.031768
DMR_1734	chr11	18725481	18725854	373	1.15647	2	0.0318003
DMR_419	chr15	44719665	44720131	466	0.675192	5	0.0318156
DMR_1735	chr3	46618597	46618668	71	1.15617	2	0.0318341
DMR_912	chr6	149887231	149887318	87	0.946515	3	0.0318736
DMR_913	chr15	98065084	98065217	133	0.945506	3	0.032018
DMR_914	chr6	100914480	100914733	253	-0.945459	3	0.0320236
DMR_1736	chr14	61448269	61448281	12	-1.15427	2	0.0320252
DMR_915	chr13	51913724	51914201	477	-0.945387	3	0.0320349
DMR_420	chr11	20182279	20182695	416	0.673739	5	0.032051
DMR_958	chr13	38173340	38173716	376	-0.94515	3	0.0320607
DMR_603	chr8	37456645	37457392	747	-0.789053	4	0.0320631
DMR_2579	chr17	79679470	79679470	0	1.32078	1	0.032197
DMR_959	chr3	16215248	16215383	135	-0.943863	3	0.0322341
DMR_1737	chr1	116925194	116925613	419	1.15118	2	0.0323155
DMR_353	chr6	88117310	88117559	249	0.544032	6	0.0323582
DMR_1738	chr14	57284219	57284528	309	1.15066	2	0.0323703
DMR_2585	chr7	111846146	111846146	0	-1.31835	1	0.0324139
DMR_960	chr11	71710885	71711021	136	0.942122	3	0.032476
DMR_421	chr11	117687628	117688338	710	-0.670974	5	0.0325106
DMR_605	chr19	16999576	16999668	92	0.78609	4	0.0325759
DMR_354	chr13	73634225	73634670	445	0.541126	6	0.0325872
DMR_606	chr7	1093718	1094263	545	-0.78563	4	0.0326558
DMR_355	chr1	78444712	78444909	197	0.539838	6	0.032717
DMR_961	chr10	119300783	119301038	255	-0.940585	3	0.0327195
DMR_2593	chr11	18063022	18063022	0	1.31475	1	0.0327646
DMR_962	chr11	71420467	71421476	1009	0.939691	3	0.0328267
DMR_2595	chr15	41049197	41049197	0	-1.31376	1	0.0328694
DMR_1739	chr1	156570825	156570967	142	1.14555	2	0.0328952
DMR_607	chr2	200330179	200330901	722	0.784322	4	0.0329106
DMR_608	chr13	113425982	113426250	268	0.784248	4	0.0329226
DMR_963	chr21	44494906	44495223	317	0.938744	3	0.0329541
DMR_2597	chr4	144620324	144620324	0	1.31286	1	0.0329759
DMR_356	chr19	5791260	5791686	426	-0.53533	6	0.0330436
DMR_609	chr22	39268830	39269216	386	0.783498	4	0.0330509
DMR_2599	chr12	49760222	49760222	0	-1.31191	1	0.0330589
DMR_1740	chr7	157644471	157644665	194	-1.14325	2	0.0331057
DMR_2601	chr16	54096679	54096679	0	1.31139	1	0.0331089
DMR_422	chr11	32417886	32417943	57	-0.667239	5	0.0331387
DMR_357	chr4	123843736	123843875	139	0.530957	6	0.0333129
DMR_1741	chr14	32798597	32798762	165	-1.1411	2	0.0333379
DMR_423	chr14	94442922	94443120	198	0.665425	5	0.0334605
DMR_964	chr13	28491326	28491540	214	0.93439	3	0.0335927
DMR_965	chr11	2415019	2415046	27	0.934119	3	0.0336338
DMR_358	chr10	30723096	30723612	516	-0.525341	6	0.0336395
DMR_1742	chr7	27162294	27162401	107	1.13748	2	0.0337443
DMR_2618	chr1	6705308	6705308	0	-1.30472	1	0.0337773
DMR_2619	chr19	12834326	12834326	0	1.30419	1	0.0338257
DMR_359	chr8	128747754	128748008	254	0.518808	6	0.0339064
DMR_966	chr11	1507746	1508046	300	0.932168	3	0.0339249
DMR_1743	chr12	7862691	7862886	195	1.13467	2	0.0340402
DMR_1744	chr3	110791400	110791439	39	1.13405	2	0.0341031
DMR_2624	chr2	134022890	134022890	0	-1.301	1	0.0341402
DMR_1745	chr14	32670418	32670611	193	1.13275	2	0.034249
DMR_610	chr5	142024615	142024839	224	-0.776702	4	0.03427
DMR_1746	chr11	8190152	8190227	75	1.13159	2	0.034366
DMR_431	chr15	76016129	76016335	206	-0.659887	5	0.034428
DMR_611	chr14	38063480	38063813	333	-0.775541	4	0.0344845
DMR_967	chr2	176950596	176951189	593	0.928535	3	0.0344877
DMR_612	chr12	101988518	101988803	285	-0.775294	4	0.0345272
DMR_613	chr22	50354009	50354034	25	-0.774419	4	0.0346925
DMR_1747	chr12	52638294	52638592	298	-1.12844	2	0.034749
DMR_614	chr7	75507868	75508125	257	0.773781	4	0.034832
DMR_1748	chr11	34072797	34072820	23	1.12692	2	0.0349078
DMR_2643	chr14	61191253	61191253	0	1.29337	1	0.0349094
DMR_968	chr4	166301076	166301256	180	-0.925452	3	0.0349497
DMR_615	chr1	204135585	204135787	202	-0.772065	4	0.0351618
DMR_2654	chr10	21817047	21817047	0	-1.28969	1	0.0352876
DMR_969	chr2	60610357	60611170	813	-0.92233	3	0.0354287
DMR_635	chr1	25559262	25559743	481	0.770678	4	0.0354424
DMR_636	chr10	13344258	13344468	210	0.770496	4	0.0354682
DMR_637	chr21	39871287	39871503	216	-0.770298	4	0.0355093
DMR_439	chr1	15271760	15272108	348	-0.653705	5	0.0355617
DMR_638	chr8	1921369	1921740	371	-0.769778	4	0.0355996
DMR_2663	chr22	27068908	27068908	0	1.28629	1	0.0356673
DMR_450	chr9	36276879	36277154	275	-0.652918	5	0.0357238
DMR_639	chr6	32904074	32904419	345	-0.769008	4	0.0357375
DMR_1749	chr15	66586919	66587360	441	-1.11866	2	0.0358214
DMR_640	chr5	64778097	64778464	367	0.768294	4	0.0358617
DMR_1750	chr10	106088755	106089003	248	-1.11691	2	0.0360116
DMR_451	chr1	237205950	237207256	1306	0.65135	5	0.036031
DMR_970	chr7	65541029	65541747	718	0.91861	3	0.0360536
DMR_971	chr1	12677923	12677936	13	0.918528	3	0.0360705
DMR_972	chr12	124196148	124196508	360	0.917951	3	0.0361536
DMR_2673	chr14	64195245	64195245	0	-1.28159	1	0.0361673
DMR_973	chr22	30163365	30164162	797	0.917598	3	0.0362189
DMR_2678	chr1	119683518	119683518	0	1.27945	1	0.0364027
DMR_462	chr7	5458719	5458901	182	-0.648943	5	0.0364793
DMR_2680	chr19	49617526	49617526	0	1.27794	1	0.0365591
DMR_1751	chr13	93880583	93880842	259	1.11236	2	0.0365632
DMR_2688	chr6	143997701	143997701	0	-1.27493	1	0.0368478
DMR_975	chr1	26370407	26371319	912	0.91339	3	0.03693
DMR_1752	chr13	108520391	108520481	90	1.10964	2	0.0369308
DMR_1753	chr15	60291880	60292055	175	1.10946	2	0.0369445
DMR_641	chr15	85873141	85873635	494	-0.762424	4	0.036972
DMR_1754	chr7	20369301	20369521	220	1.10879	2	0.0370179
DMR_1755	chr2	289702	289731	29	-1.1084	2	0.0370631
DMR_976	chr5	95769993	95770238	245	0.912536	3	0.0370711
DMR_1756	chr4	1583233	1583898	665	1.10805	2	0.0371018
DMR_1757	chr6	15505345	15505452	107	-1.10799	2	0.0371098
DMR_642	chr3	113415666	113416066	400	0.761482	4	0.0371413
DMR_643	chr10	79397930	79398055	125	-0.761276	4	0.037184
DMR_2695	chr10	45407522	45407522	0	-1.27114	1	0.0372614
DMR_2697	chr7	16459464	16459464	0	1.27008	1	0.0373767
DMR_2699	chr4	77135205	77135205	0	-1.26713	1	0.0376694
DMR_644	chr16	29674618	29674972	354	0.758571	4	0.0377234
DMR_977	chr19	19739407	19739414	7	-0.908667	3	0.0377323
DMR_645	chr11	69517299	69518003	704	0.758535	4	0.0377339
DMR_646	chr5	90675774	90676157	383	0.758013	4	0.0378412
DMR_463	chr16	4323067	4323134	67	0.641489	5	0.0378839
DMR_978	chr6	10521558	10521612	54	0.907596	3	0.0379073
DMR_647	chr1	225841605	225841794	189	0.757528	4	0.0379541
DMR_2709	chr6	74071926	74071926	0	1.26471	1	0.0379686
DMR_979	chr12	98908615	98908697	82	0.906121	3	0.0381484
DMR_1758	chr20	60877581	60877648	67	-1.09726	2	0.0384395
DMR_980	chr17	30228371	30228424	53	0.904218	3	0.0384669
DMR_1759	chr12	7023461	7023482	21	1.09696	2	0.0384806
DMR_464	chr5	180237215	180237544	329	-0.638004	5	0.0384999
DMR_981	chr11	119294941	119295232	291	-0.903898	3	0.0385225
DMR_982	chr10	111968359	111968452	93	0.903558	3	0.0385991
DMR_1760	chr6	82463433	82463776	343	-1.09598	2	0.0386128
DMR_465	chr12	22094009	22094270	261	0.636998	5	0.0386773
DMR_1761	chr9	2623146	2623562	416	-1.09522	2	0.0387112
DMR_1762	chr1	169864255	169865202	947	-1.09399	2	0.03887
DMR_1763	chr12	49583043	49583094	51	-1.09331	2	0.0389797
DMR_2724	chr6	166878682	166878682	0	-1.25658	1	0.038991
DMR_983	chr17	1898824	1898897	73	0.900558	3	0.0391337
DMR_2733	chr3	187464648	187464648	0	1.25515	1	0.0391716
DMR_984	chr10	27444699	27444905	206	0.900132	3	0.0392192
DMR_1764	chr1	229407212	229407517	305	1.09142	2	0.0392442
DMR_2736	chr13	49149261	49149261	0	1.25444	1	0.039253
DMR_1765	chr1	156031951	156032074	123	-1.09126	2	0.0392724
DMR_466	chr11	121972480	121973360	880	0.633752	5	0.0392998
DMR_467	chr5	175108168	175108429	261	0.633078	5	0.0394417
DMR_985	chr2	114648106	114648509	403	-0.898355	3	0.0395231
DMR_1766	chr14	22992066	22992073	7	-1.08938	2	0.0395433
DMR_1767	chr18	47813745	47813856	111	1.08928	2	0.0395578
DMR_1768	chr6	1624386	1624442	56	1.08889	2	0.0395973
DMR_1769	chr3	187458083	187458630	547	-1.08875	2	0.0396102
DMR_648	chr7	30960786	30960956	170	0.749345	4	0.039632
DMR_1770	chr15	55562699	55562718	19	-1.08853	2	0.0396489
DMR_2746	chr1	38396334	38396334	0	1.25068	1	0.0396763
DMR_1771	chr7	26404716	26404734	18	-1.08801	2	0.0397167
DMR_1772	chr12	47609357	47609513	156	1.08732	2	0.0398134
DMR_1773	chr5	34655743	34655896	153	1.08716	2	0.039832
DMR_649	chr10	130338213	130338886	673	-0.748123	4	0.039882
DMR_650	chr20	21686282	21686376	94	0.747962	4	0.0399142
DMR_986	chr10	106028928	106029109	181	0.895763	3	0.0399795
DMR_651	chr10	119301999	119302062	63	0.747206	4	0.0400763
DMR_652	chr7	106302391	106302930	539	0.747176	4	0.0400811
DMR_987	chr8	67874178	67874250	72	0.894776	3	0.0401682
DMR_653	chr6	150285026	150285139	113	0.746731	4	0.0401819
DMR_988	chr17	80843878	80845107	1229	0.894573	3	0.0401956
DMR_989	chr3	113933175	113934079	904	0.89451	3	0.040215
DMR_2759	chr2	171571533	171571533	0	-1.24542	1	0.0402875
DMR_468	chr15	72765973	72766291	318	0.628298	5	0.0403674
DMR_654	chr2	175190270	175190731	461	0.74573	4	0.0403835
DMR_1774	chr7	151328093	151328116	23	1.08253	2	0.0404899
DMR_1775	chr11	113745722	113745956	234	-1.08204	2	0.0405576
DMR_1776	chr14	62462754	62462931	177	1.08201	2	0.0405641
DMR_1777	chr15	99972364	99972595	231	1.08192	2	0.0405778
DMR_990	chr1	16346299	16346434	135	0.891799	3	0.0407133
DMR_1778	chr9	35116984	35116987	3	-1.08075	2	0.0407326
DMR_2770	chr1	120189930	120189930	0	1.2418	1	0.0407592
DMR_655	chr17	7018242	7018598	356	-0.743878	4	0.0407794
DMR_656	chr15	66797150	66797357	207	0.743876	4	0.0407794
DMR_657	chr11	46141386	46142000	614	0.743462	4	0.040864
DMR_1779	chr12	30848160	30848710	550	1.07979	2	0.0408761
DMR_1780	chr6	56716612	56716656	44	1.07958	2	0.0409084
DMR_991	chr12	119614312	119614370	58	-0.89093	3	0.040914
DMR_1781	chr1	179335396	179335598	202	-1.07951	2	0.0409189
DMR_2773	chr14	55494452	55494452	0	1.24001	1	0.0409882
DMR_658	chr1	51443292	51443457	165	-0.74288	4	0.0409939
DMR_2774	chr19	58071383	58071383	0	1.23951	1	0.0410487
DMR_469	chr11	78286207	78286346	139	0.624007	5	0.0412204
DMR_2780	chr1	11865920	11865920	0	-1.23751	1	0.0412858
DMR_659	chr18	53253181	53253483	302	-0.741439	4	0.041318
DMR_660	chr17	46685846	46686245	399	0.740982	4	0.0414131
DMR_992	chr4	21697613	21698253	640	0.888241	3	0.0414156
DMR_661	chr1	154947991	154948305	314	-0.740879	4	0.041439
DMR_662	chr4	128553617	128553694	77	0.740304	4	0.0415631
DMR_993	chr1	150947403	150947442	39	-0.887272	3	0.0415696
DMR_663	chr11	7598302	7598673	371	-0.740263	4	0.0415728
DMR_994	chr1	85512957	85513315	358	-0.887178	3	0.0415792
DMR_2788	chr7	30490222	30490222	0	-1.23462	1	0.0416696
DMR_995	chr15	41849953	41850280	327	0.886123	3	0.0418115
DMR_1782	chr3	125634060	125634299	239	1.07274	2	0.0418623
DMR_664	chr5	38259135	38259398	263	-0.738805	4	0.041876
DMR_1783	chr9	135282384	135282417	33	-1.07261	2	0.041876
DMR_665	chr11	67033676	67033801	125	-0.738303	4	0.0419784
DMR_1784	chr5	175965158	175965200	42	-1.07157	2	0.0420558
DMR_996	chr1	151966448	151966478	30	0.884773	3	0.0420856
DMR_666	chr12	81471194	81471533	339	0.737781	4	0.0420937
DMR_2797	chr8	28176295	28176295	0	1.23117	1	0.0421187
DMR_667	chr7	1336380	1336729	349	0.7374	4	0.04218
DMR_1785	chr5	133339500	133339613	113	-1.07044	2	0.0422179
DMR_668	chr9	2158031	2158367	336	-0.736831	4	0.0422953
DMR_997	chr5	72715927	72716074	147	0.883462	3	0.0423283
DMR_669	chr16	57837309	57838414	1105	0.736656	4	0.0423372
DMR_998	chr11	67084644	67084887	243	-0.882786	3	0.0424638
DMR_670	chr8	30242993	30244710	1717	0.736014	4	0.0424686
DMR_2806	chr12	7034825	7034825	0	-1.22794	1	0.0425597
DMR_999	chr14	23816988	23818297	1309	0.881857	3	0.0426291
DMR_1786	chr10	103114219	103114734	515	1.06744	2	0.0426541
DMR_2811	chr1	40784323	40784323	0	1.22717	1	0.0426694
DMR_671	chr1	162601805	162602295	490	-0.735062	4	0.0426912
DMR_672	chr22	39759957	39760036	79	0.734468	4	0.0428089
DMR_2814	chr15	59981869	59981869	0	1.22612	1	0.0428137
DMR_2816	chr11	8964967	8964967	0	1.22598	1	0.0428323
DMR_470	chr19	13227642	13227748	106	0.615108	5	0.042983
DMR_1787	chr9	71735898	71736075	177	1.0637	2	0.043229
DMR_673	chr5	138088151	138088662	511	0.732597	4	0.0432677
DMR_674	chr17	37010032	37010237	205	0.732235	4	0.0433483
DMR_471	chr5	153851369	153852760	1391	-0.61328	5	0.0433491
DMR_675	chr21	26979779	26979856	77	0.732074	4	0.0433886
DMR_1788	chr3	181417613	181418456	843	1.06233	2	0.0434241
DMR_472	chr2	200819818	200819919	101	0.612866	5	0.0434475
DMR_473	chr9	73483939	73484058	119	0.612766	5	0.0434749
DMR_474	chr4	164253006	164253656	650	0.612451	5	0.0435483
DMR_1789	chr3	156544586	156544835	249	1.06151	2	0.0435571
DMR_1000	chr11	95524042	95524497	455	-0.875013	3	0.0439627
DMR_676	chr1	145473005	145473213	208	0.729402	4	0.04402
DMR_677	chr2	108158860	108159066	206	-0.729359	4	0.0440321
DMR_1001	chr18	59156652	59157014	362	0.874468	3	0.0440853
DMR_1002	chr1	156251280	156251456	176	0.874305	3	0.0441199
DMR_2845	chr16	57278643	57278643	0	1.21595	1	0.0442175
DMR_2846	chr4	187645059	187645059	0	1.21595	1	0.0442215
DMR_2848	chr4	175139486	175139486	0	-1.21554	1	0.0442756
DMR_2851	chr7	99752629	99752629	0	1.21526	1	0.0443143
DMR_678	chr5	113697330	113697649	319	0.728165	4	0.0443457
DMR_1003	chr1	193073694	193073866	172	0.87314	3	0.044353
DMR_2855	chr20	19739422	19739422	0	1.21382	1	0.0445191
DMR_475	chr2	28718470	28718796	326	-0.607411	5	0.0445384
DMR_476	chr1	159770136	159770368	232	0.607066	5	0.044611
DMR_1004	chr6	1626409	1626841	432	-0.871876	3	0.0446247
DMR_2860	chr1	167189002	167189002	0	-1.2122	1	0.0447327
DMR_2863	chr12	8090933	8090933	0	1.21172	1	0.0447964
DMR_2865	chr14	105558566	105558566	0	-1.21138	1	0.0448513
DMR_2867	chr7	84814683	84814683	0	-1.21103	1	0.0449101
DMR_1790	chr17	1588436	1588445	9	-1.05235	2	0.0449706
DMR_2868	chr20	62668469	62668469	0	-1.21052	1	0.0450037
DMR_2869	chr4	156680400	156680400	0	1.21044	1	0.045015
DMR_2874	chr12	6605071	6605071	0	1.20907	1	0.0452327
DMR_679	chr4	24914750	24914790	40	-0.72424	4	0.0452649
DMR_477	chr1	197169700	197169957	257	0.603943	5	0.0452706
DMR_2878	chr11	66080868	66080868	0	-1.20819	1	0.0453488
DMR_680	chr19	40865247	40865375	128	0.723821	4	0.0453552
DMR_2879	chr7	30491309	30491309	0	1.20788	1	0.0453939
DMR_1791	chr7	80548718	80548725	7	-1.04956	2	0.0454375
DMR_1792	chr2	165695828	165696560	732	1.04953	2	0.0454407
DMR_1005	chr12	53343514	53343849	335	0.867575	3	0.0454528
DMR_681	chr10	6188149	6189073	924	0.723367	4	0.04546
DMR_2881	chr19	58869424	58869424	0	1.20697	1	0.0455399
DMR_1793	chr22	28314353	28314561	208	1.04884	2	0.0455463
DMR_1794	chr17	40250727	40251003	276	1.0485	2	0.0456068
DMR_2888	chr19	55740188	55740188	0	1.20502	1	0.045835
DMR_2890	chr2	219575674	219575674	0	1.20466	1	0.0458898
DMR_478	chr19	17186472	17186517	45	0.600368	5	0.0459333
DMR_1795	chr5	32711517	32711734	217	1.04604	2	0.0459583
DMR_1796	chr6	136788025	136788106	81	1.04591	2	0.0459833
DMR_682	chr8	124193667	124193865	198	0.720907	4	0.0460712
DMR_683	chr20	17950611	17950965	354	0.72036	4	0.0461793
DMR_1006	chr5	180645302	180645336	34	0.863524	3	0.0462914
DMR_2902	chr13	100635905	100635905	0	-1.2016	1	0.0463921
DMR_1797	chr18	33647344	33647470	126	1.04342	2	0.0464325
DMR_1007	chr8	26723946	26724234	288	0.862603	3	0.0464816
DMR_1008	chr7	2597979	2598171	192	0.862472	3	0.0465107
DMR_1009	chr11	119252847	119252980	133	-0.861623	3	0.0466792
DMR_491	chr2	238599734	238600469	735	-0.596623	5	0.0467002
DMR_684	chr2	217557616	217558075	459	0.718154	4	0.0467026
DMR_1798	chr9	140149673	140149675	2	-1.04172	2	0.0467405
DMR_1010	chr17	35300448	35300677	229	0.861329	3	0.0467598
DMR_1799	chr6	139456890	139457149	259	1.04122	2	0.0468187
DMR_685	chr4	54959419	54960034	615	-0.717465	4	0.0468558
DMR_1800	chr7	140774104	140774161	57	-1.04039	2	0.0469566
DMR_1801	chr5	154236651	154236935	284	1.03968	2	0.0470743
DMR_686	chr19	55896449	55896656	207	0.716425	4	0.0471025
DMR_492	chr20	50416258	50416966	708	0.594715	5	0.0471146
DMR_1802	chr1	57887655	57888059	404	1.03888	2	0.047196
DMR_1011	chr3	49130482	49130805	323	0.858781	3	0.0472759
DMR_1803	chr14	56585092	56585102	10	1.03844	2	0.0472791
DMR_687	chr7	1096318	1096568	250	0.715527	4	0.0473251
DMR_1804	chr11	133827193	133827256	63	-1.03809	2	0.0473404
DMR_1012	chr1	35496792	35497073	281	0.858478	3	0.0473452
DMR_2930	chr17	40260053	40260053	0	-1.19487	1	0.0474194
DMR_688	chr5	41794623	41794804	181	-0.714567	4	0.0475557
DMR_1805	chr3	49507543	49507545	2	-1.03647	2	0.0476331
DMR_689	chr1	108735713	108736858	1145	0.714209	4	0.047654
DMR_2936	chr11	1786754	1786754	0	-1.1934	1	0.0476685
DMR_690	chr16	1578573	1578646	73	0.71356	4	0.0478314
DMR_493	chr17	1733419	1733691	272	0.590739	5	0.0478629
DMR_691	chr1	15653410	15653607	197	0.713371	4	0.0478758
DMR_2942	chr20	42545443	42545443	0	-1.19204	1	0.0478806
DMR_1013	chr3	57204673	57204834	161	0.856082	3	0.0478822
DMR_2945	chr16	24552869	24552869	0	1.19178	1	0.0479169
DMR_1806	chr7	150520743	150521315	572	1.03475	2	0.0479346
DMR_1014	chr4	41614123	41614225	102	-0.855277	3	0.0480378
DMR_1015	chr17	48240925	48241445	520	0.855243	3	0.0480467
DMR_494	chr19	48613831	48614177	346	0.589421	5	0.0481217
DMR_692	chr2	88469730	88469819	89	0.71231	4	0.0481225
DMR_1807	chr6	26659419	26659537	118	1.0335	2	0.0481644
DMR_2951	chr5	146833665	146833665	0	1.18934	1	0.0483071
DMR_1808	chr10	23216182	23216299	117	1.03255	2	0.0483192
DMR_1809	chr4	85416865	85417077	212	1.03185	2	0.0484345
DMR_2957	chr10	23479645	23479645	0	1.18802	1	0.0485128
DMR_1810	chr2	216299448	216299545	97	1.03052	2	0.0486797
DMR_1811	chr1	228195779	228195794	15	-1.03047	2	0.0486934
DMR_1016	chr2	201936671	201937026	355	0.851975	3	0.048774
DMR_1017	chr15	29966827	29967040	213	-0.850999	3	0.0489861
DMR_1812	chr16	51797319	51797349	30	1.02827	2	0.0490619
DMR_1018	chr10	75385515	75385537	22	0.850366	3	0.0491514
DMR_1019	chr14	23540892	23541523	631	0.850294	3	0.0491651
DMR_495	chr10	30722658	30722736	78	0.583845	5	0.0491973
DMR_496	chr5	34657262	34657986	724	0.583516	5	0.0492586
DMR_1813	chr2	220246215	220246552	337	1.0271	2	0.0492626
DMR_1814	chr21	47717406	47717575	169	1.0267	2	0.049332
DMR_1815	chr19	39391444	39391594	150	1.02665	2	0.0493384
DMR_693	chr10	91061634	91061902	268	-0.707221	4	0.0493844
DMR_1020	chr20	5108045	5108385	340	0.849357	3	0.0493916
DMR_1021	chr3	127174481	127174816	335	0.84892	3	0.0494957
DMR_694	chr5	122179004	122179777	773	0.705975	4	0.0497029
DMR_695	chr2	161128123	161128446	323	0.705787	4	0.0497577
DMR_1022	chr11	119235342	119235802	460	0.847693	3	0.049769
DMR_1023	chr5	87441873	87441969	96	0.84766	3	0.0497787
DMR_2978	chr1	217261949	217261949	0	1.1803	1	0.0498021
DMR_1816	chr4	186545666	186545838	172	-1.02384	2	0.0498351
DMR_2980	chr21	46677080	46677080	0	1.18001	1	0.0498383
DMR_696	chr14	39643268	39644110	842	0.705133	4	0.0499456
DMR_1024	chr8	17207503	17207717	214	-0.846807	3	0.0499899
DMR_1817	chr17	56495150	56495283	133	1.02293	2	0.0499956
